# Supplementary material for: Melatonin Analogues Potently Inhibit MAO-B and Protect PC12 Cells against Oxidative Stress
Source: MDPI journal article supplement (doi:10.3390/antiox10101604), 2021-10-12
Supplement: s1 [file s1]

## **Supplementary material**

# **Melatonin Analogues Potently Inhibit MAO-B and Protect PC12 Cells against Oxidative Stress**

### Contents

1. General methods and instruments (Chemistry)
2.  $^1\text{H}$ NMR and  $^{13}\text{C}$ NMR charts
3. HPLC purity data charts
4. HRMS charts
5. IR charts
6. Materials and methods of monoamine oxidase (MAO) enzyme assay

References

## 1. General methods and instruments (Chemistry)

All of the commercial chemicals were of reagent grade and were used without further purification. Melting points were measured on the Thermo Scientific 9200 apparatus. Proton nuclear magnetic resonance ( $^1\text{H}$  NMR) spectra were determined on a Varian (400 MHz) spectrometer (Varian Medical Systems, Inc., Palo Alto, CA, U.S.A.). Multiplicity is indicated by the following abbreviations: singlet (s), doublet (d), doublet of doublet (dd), triplet (t), quartet (q), multiplet (m), and broad (b). The values of the chemical shifts are expressed in  $\delta$  values (ppm), and the coupling constants ( $J$ ) are reported in hertz.  $^{13}\text{C}$  NMR spectra were recorded on a Varian (100 MHz) spectrometer. Chemical shifts are provided in parts per million (ppm) downfield from tetramethylsilane (internal standard) with coupling constants in hertz. Mass spectra were recorded using high-resolution mass spectrometry (HRMS, ESI-MS), obtained on a G2 QTOF mass spectrometer (Waters Corporation, Milford, MA, U.S.A.). Infrared (IR) spectra were recorded as KBr disks using a Shimadzu FT-IR 8400S infrared spectrophotometer. Products were purified by column or flash column chromatography (Biotage, Sweden) using silica gel 60 (230–400 mesh Kieselgel 60). Additionally, thin-layer chromatography on 0.25 mm silica plates (E. Merck, silica gel 60 F254) was used to monitor reactions. Spots were detected by viewing under ultraviolet (UV) light. The optical purity of the synthesized compounds was established by chiral high-performance liquid chromatography (HPLC) analysis: Chiralpak IG-3 (4.6  $\times$  150, 3), hexane/EtOH/ MeOH = 85:10:5, 1.5 mL/min, and  $\lambda$  = 280 nm.

## 2. $^1\text{H}$ NMR and $^{13}\text{C}$ NMR charts

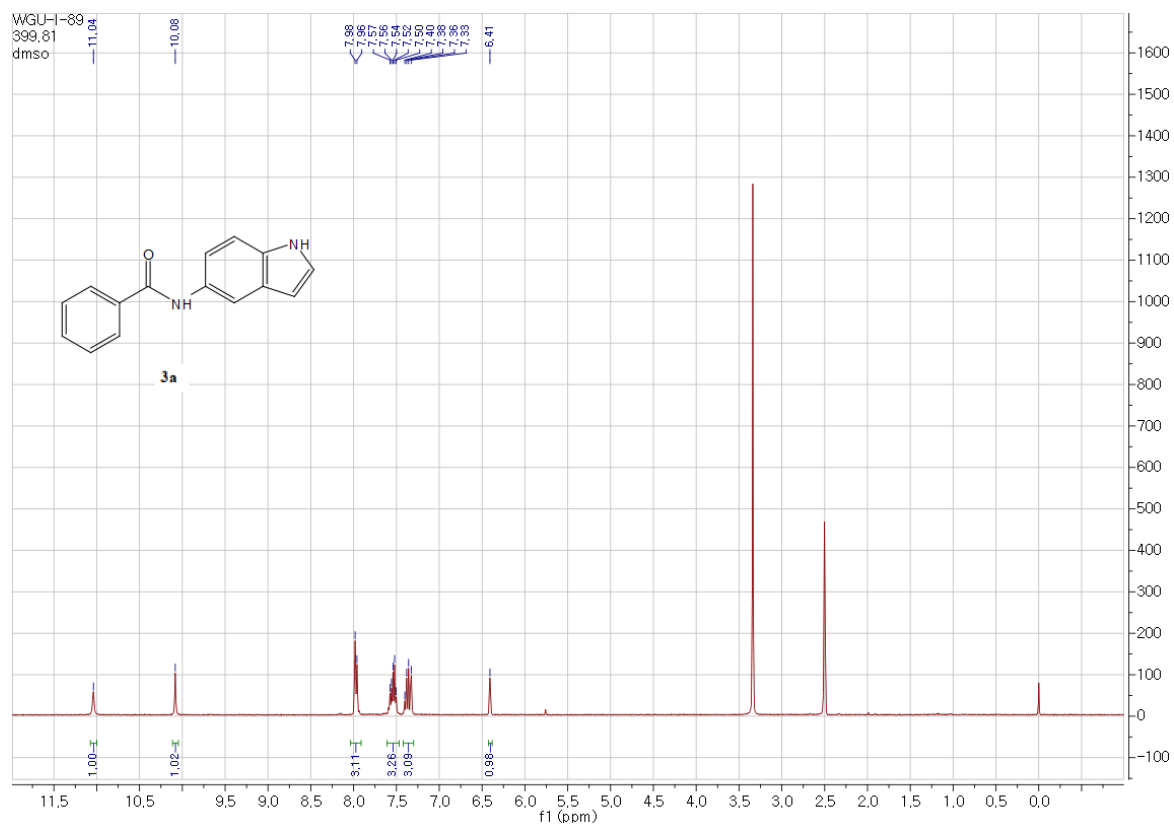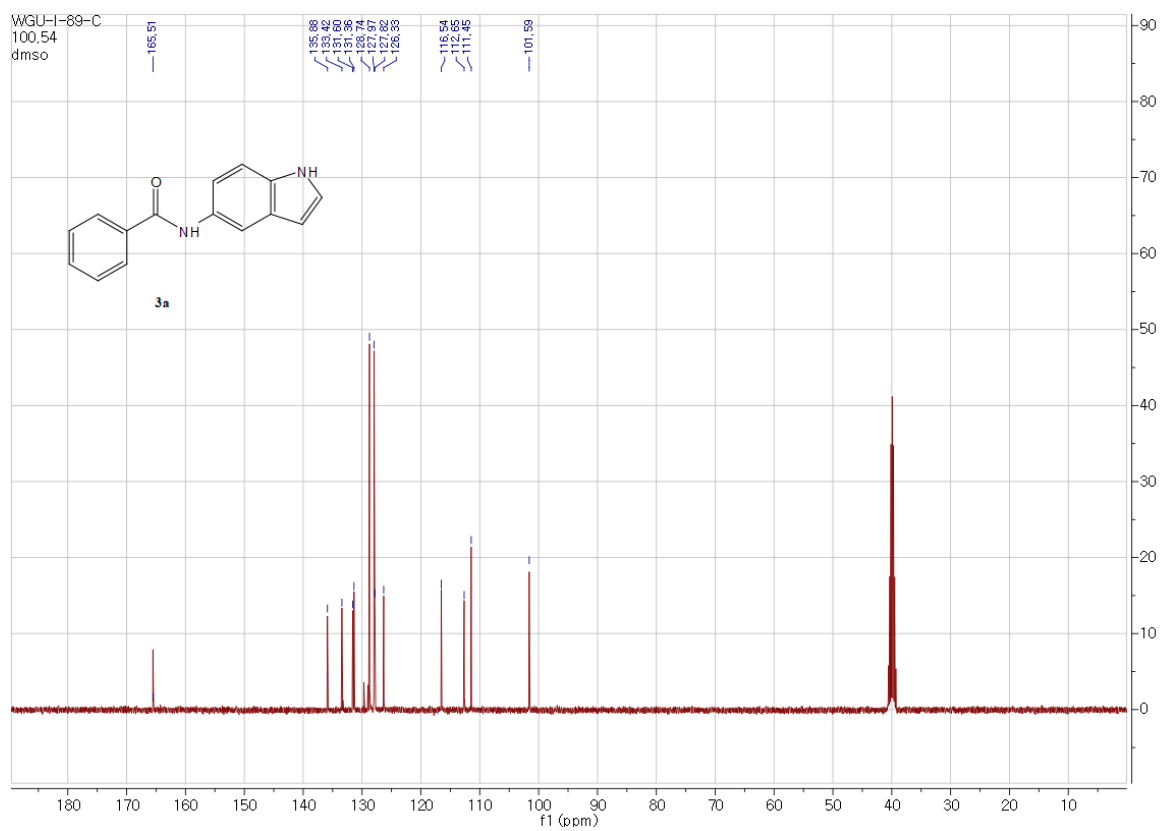

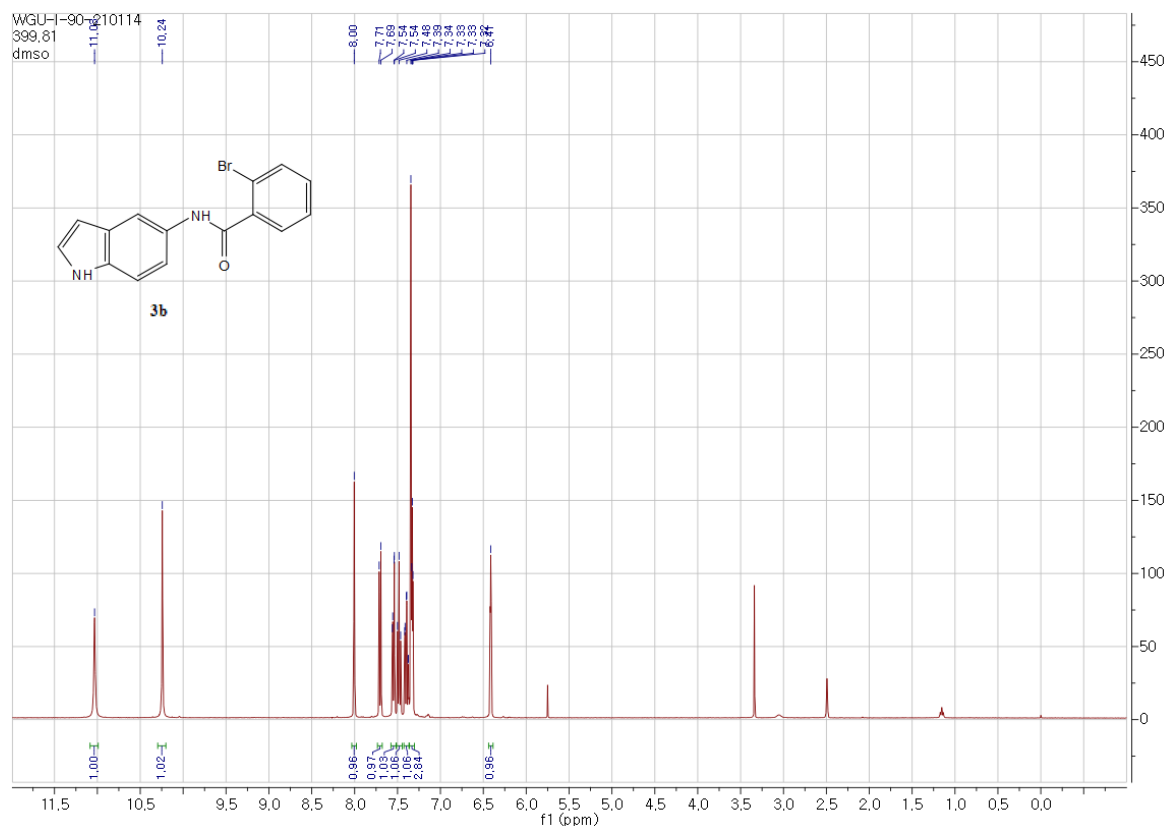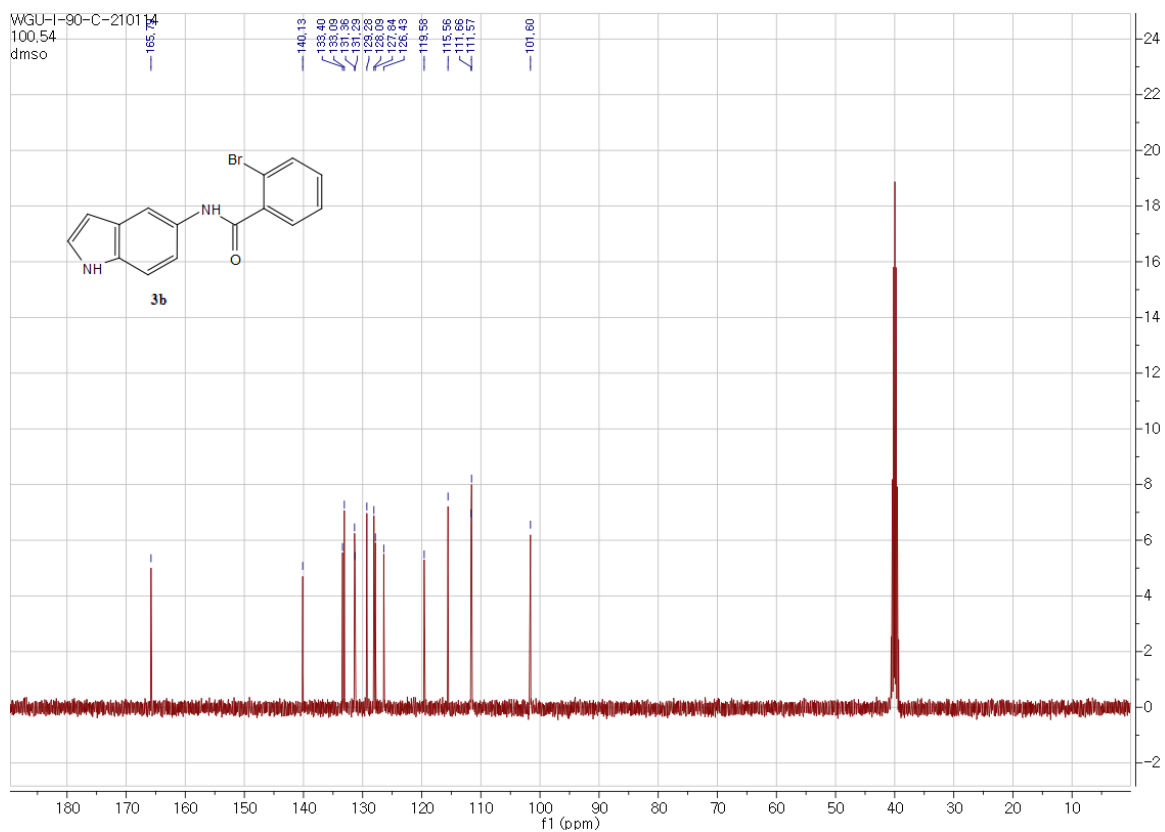

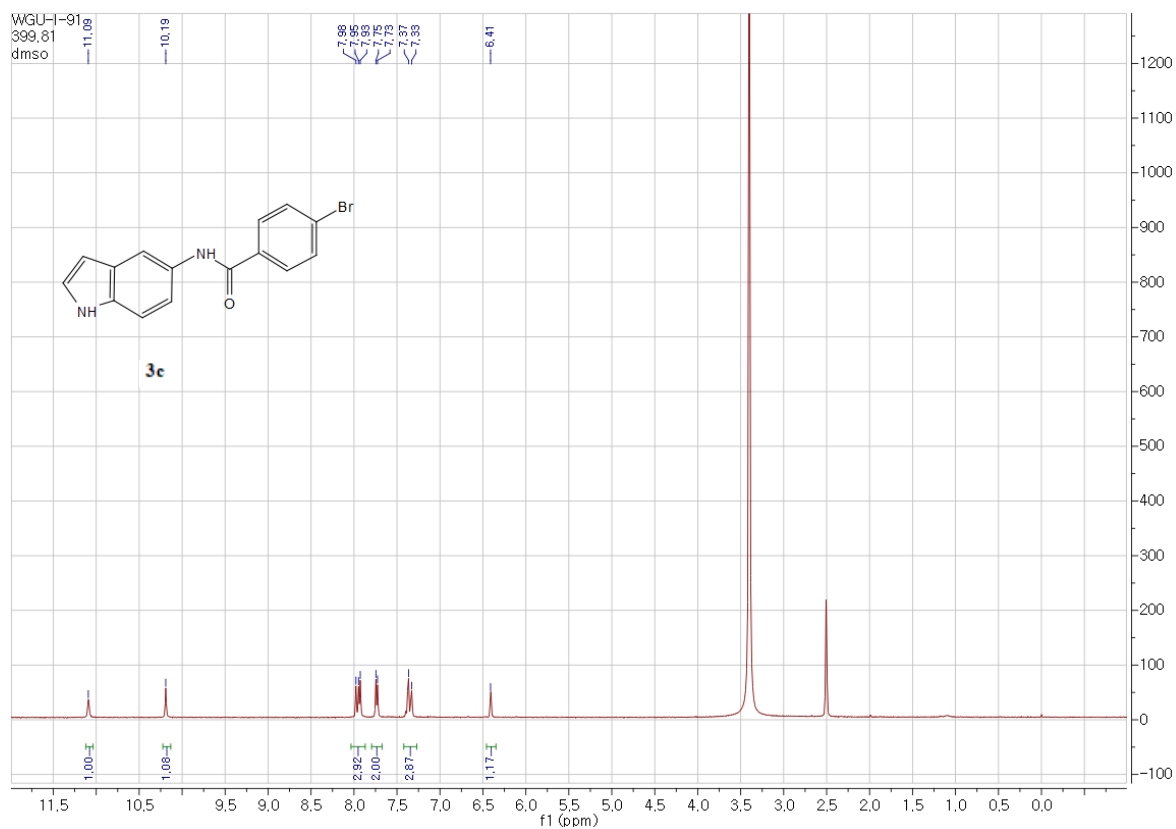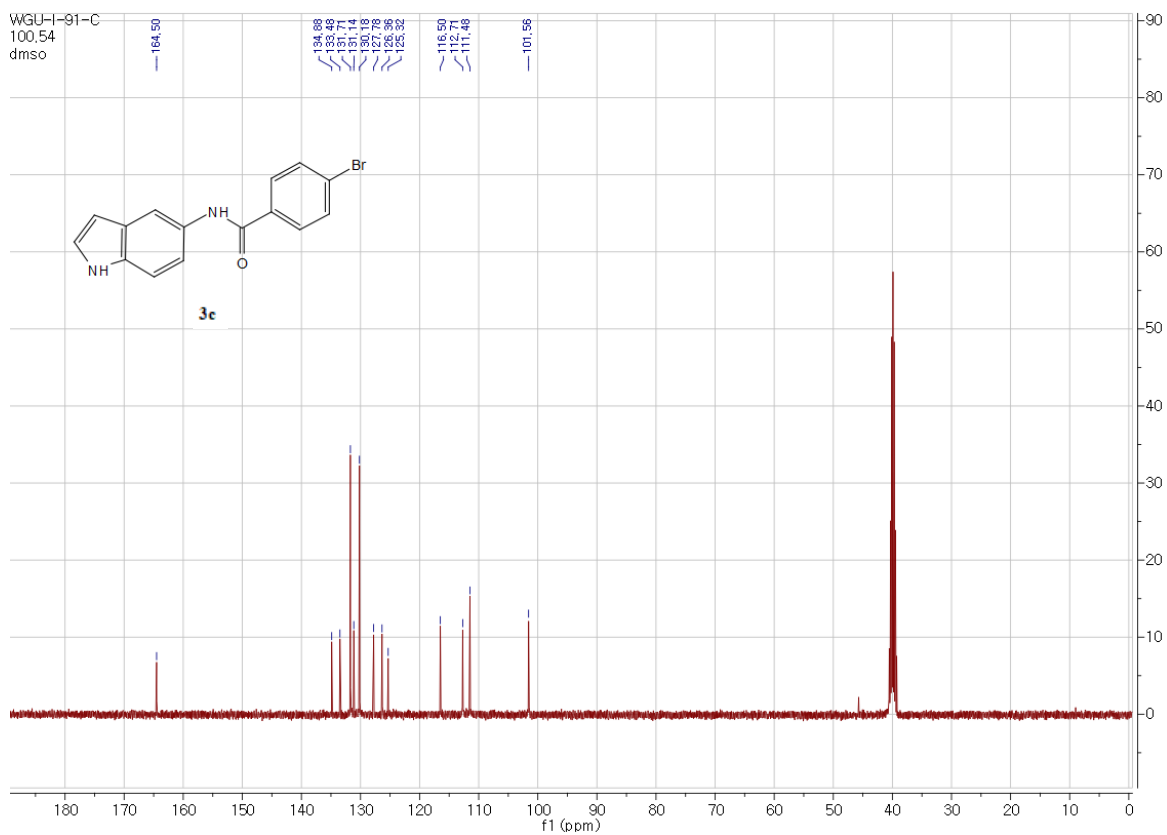

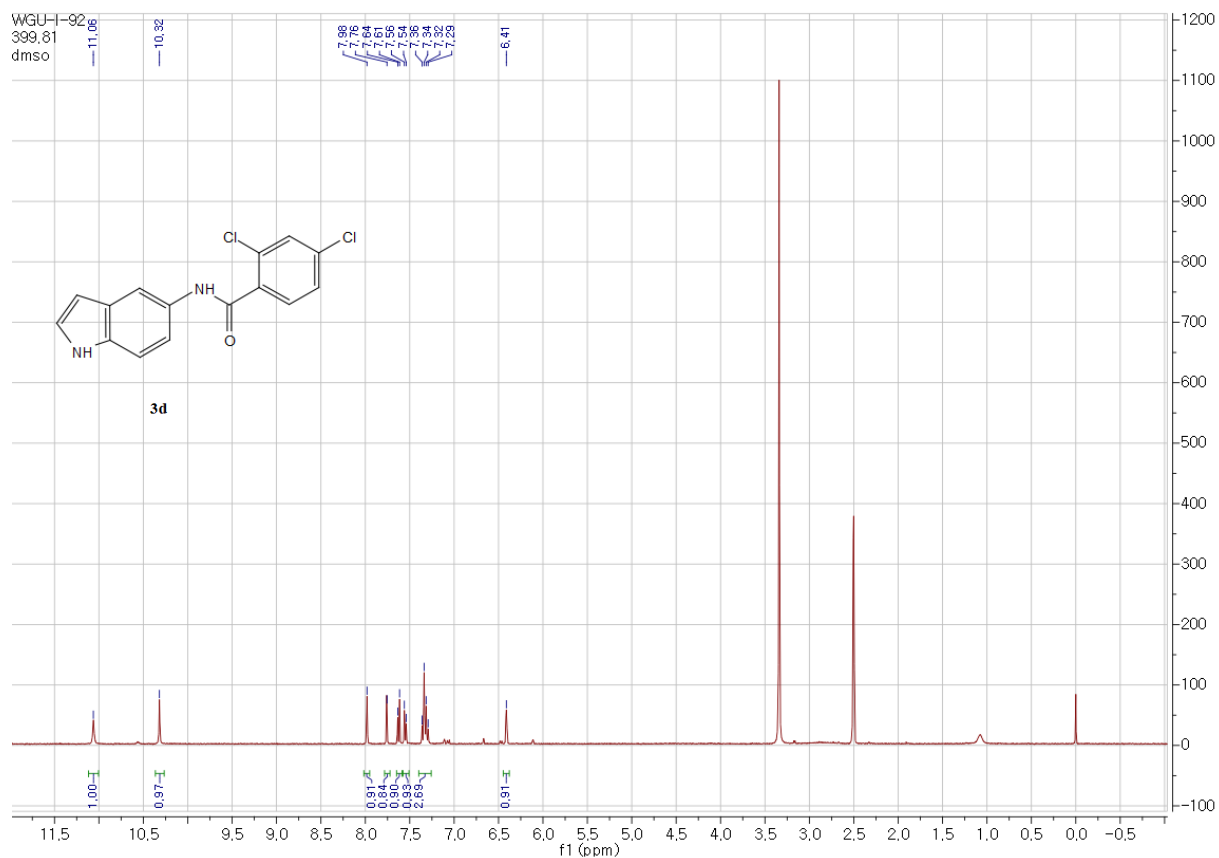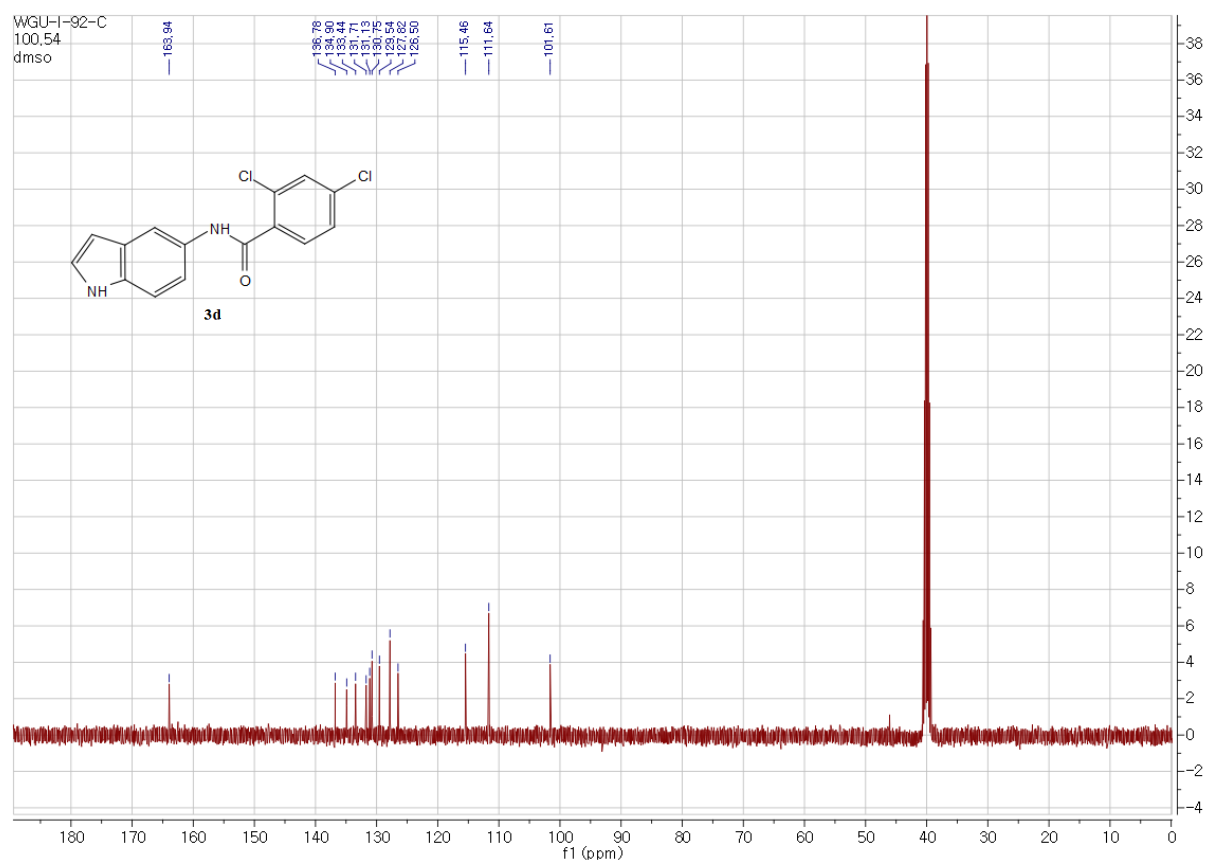

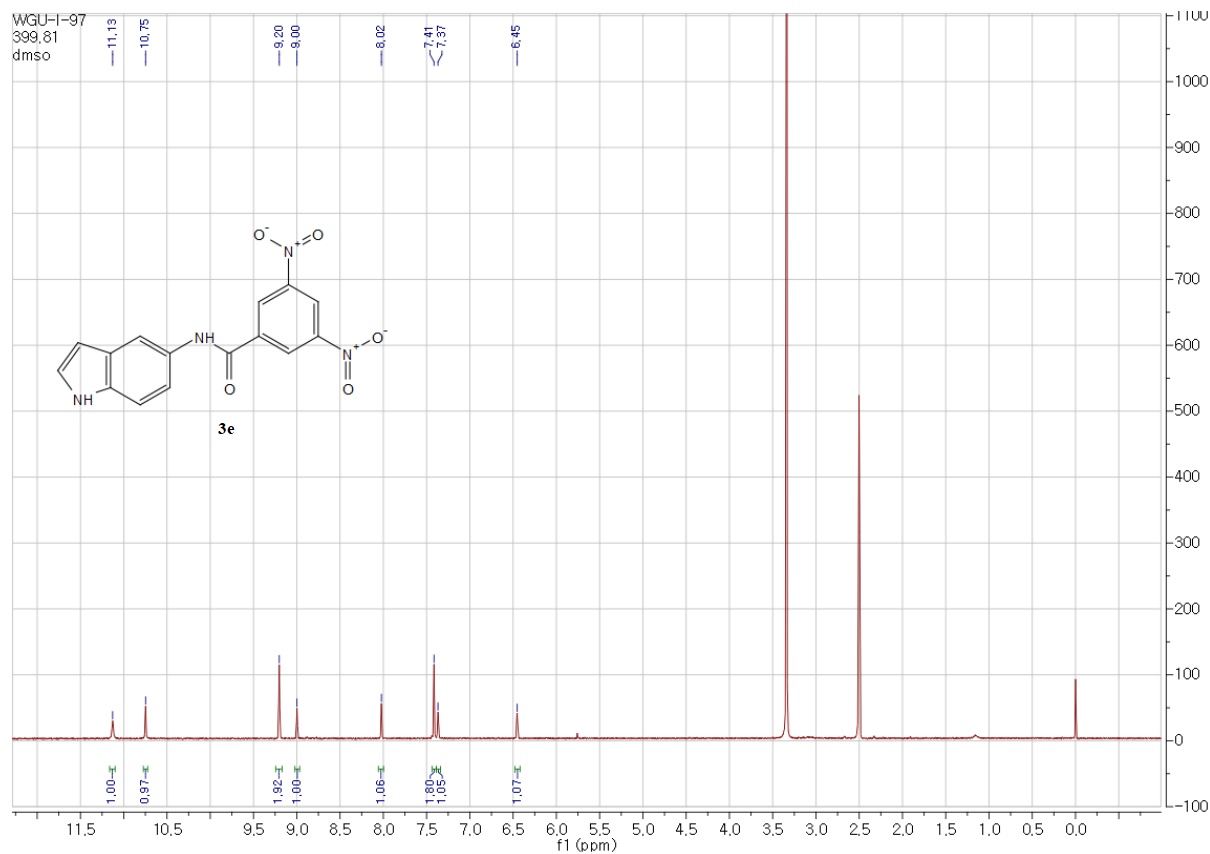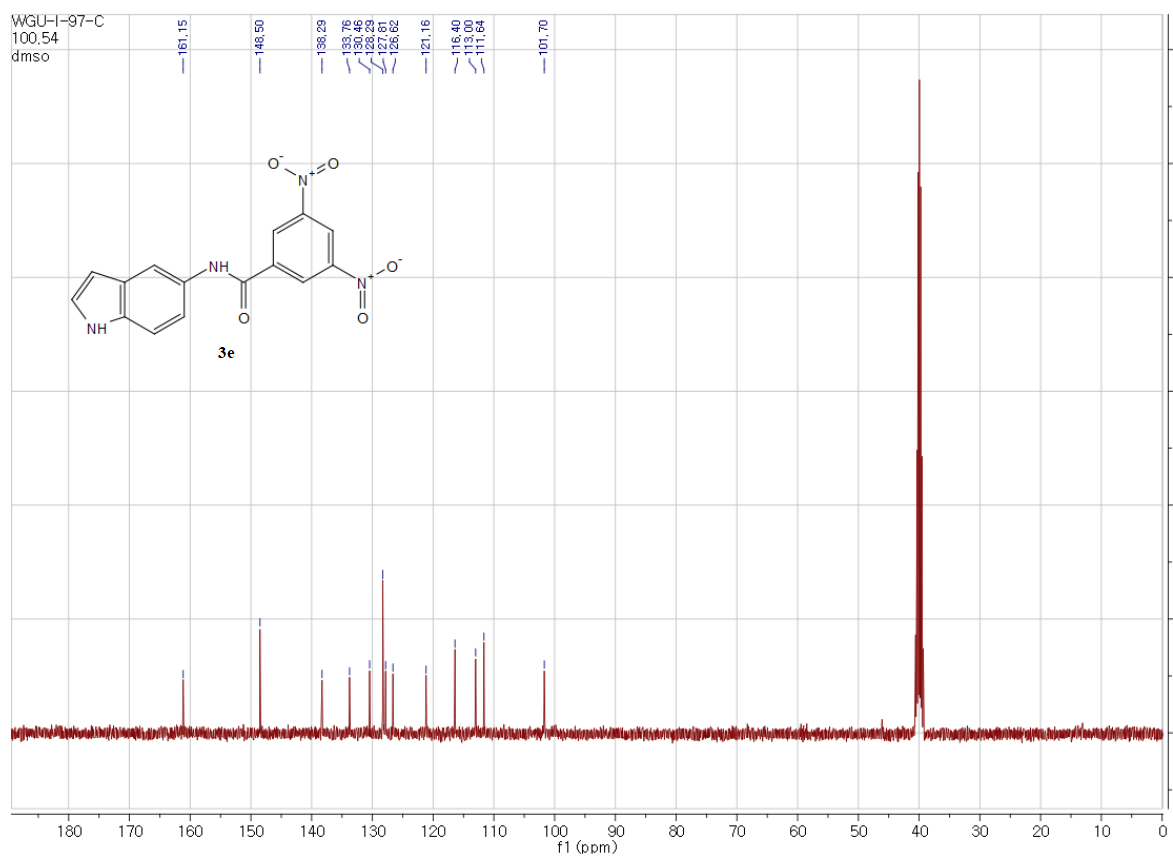

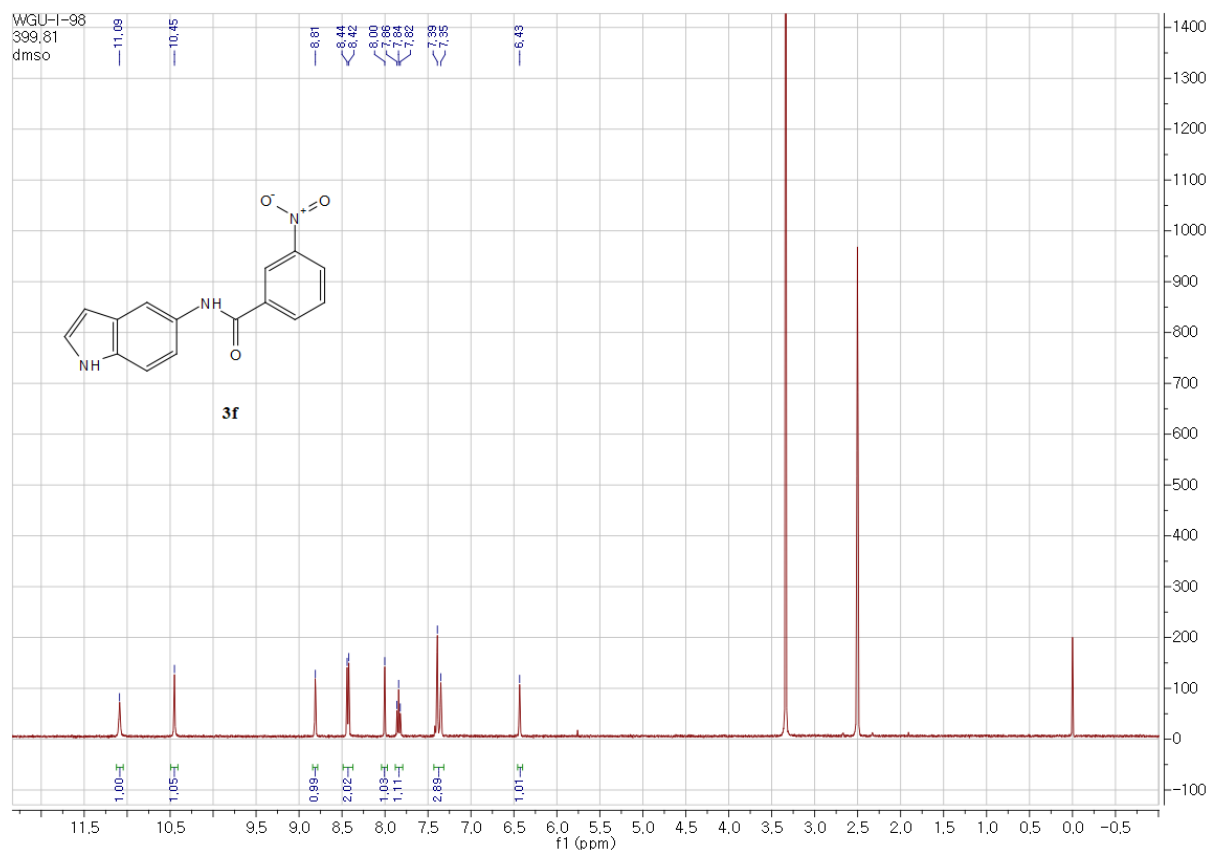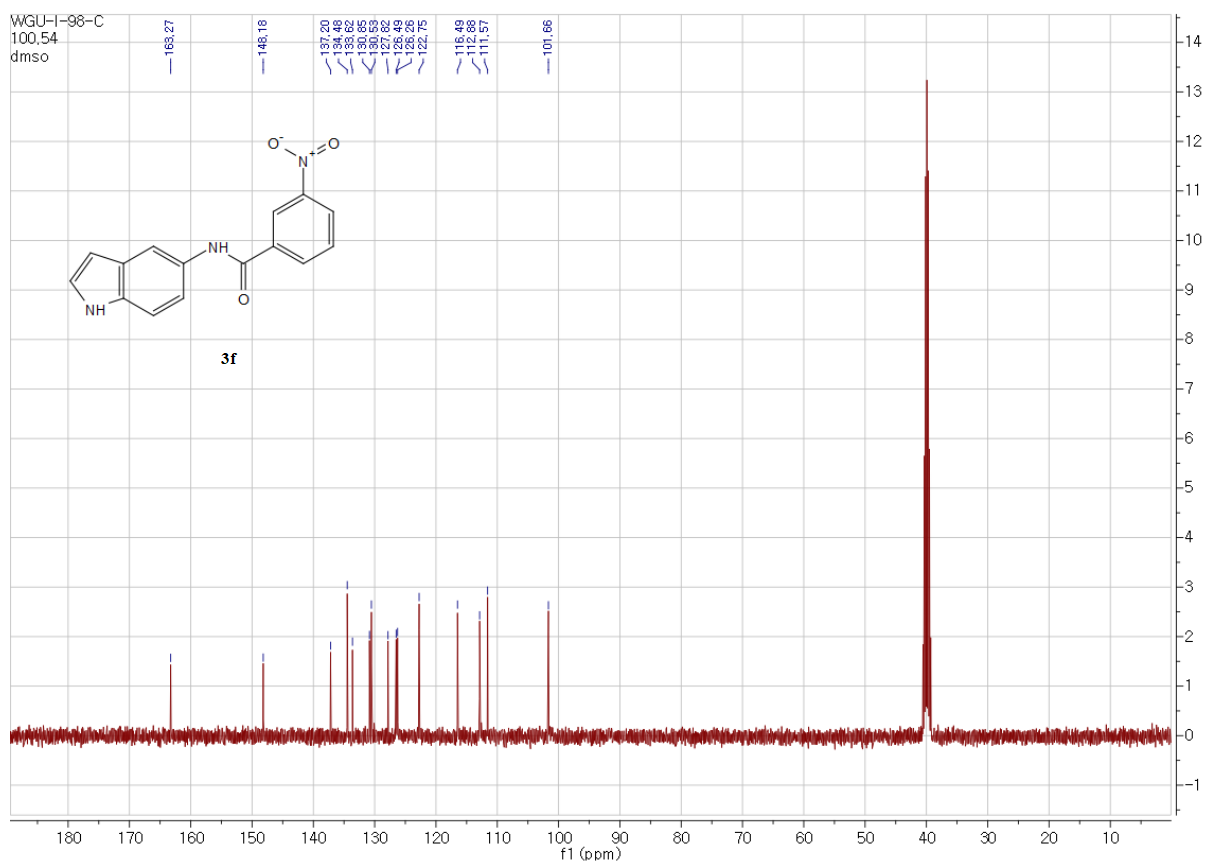



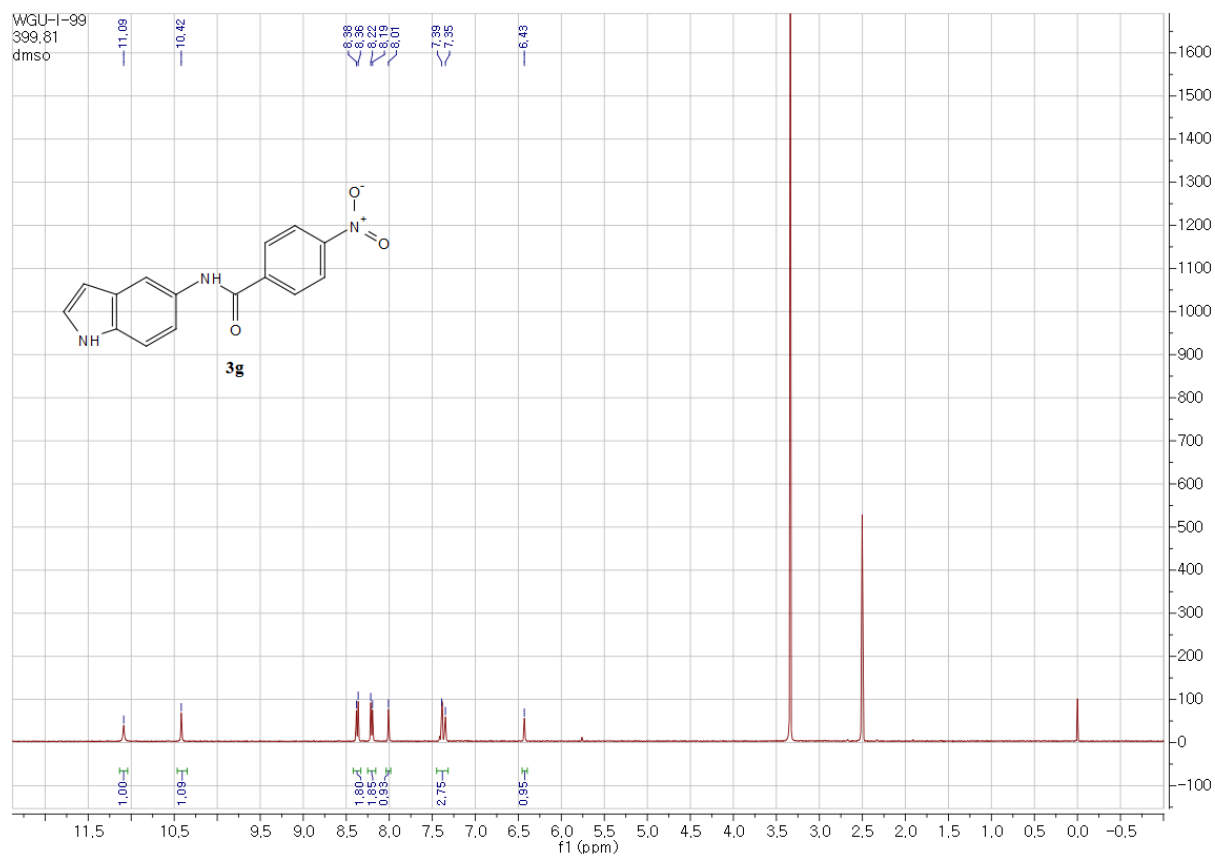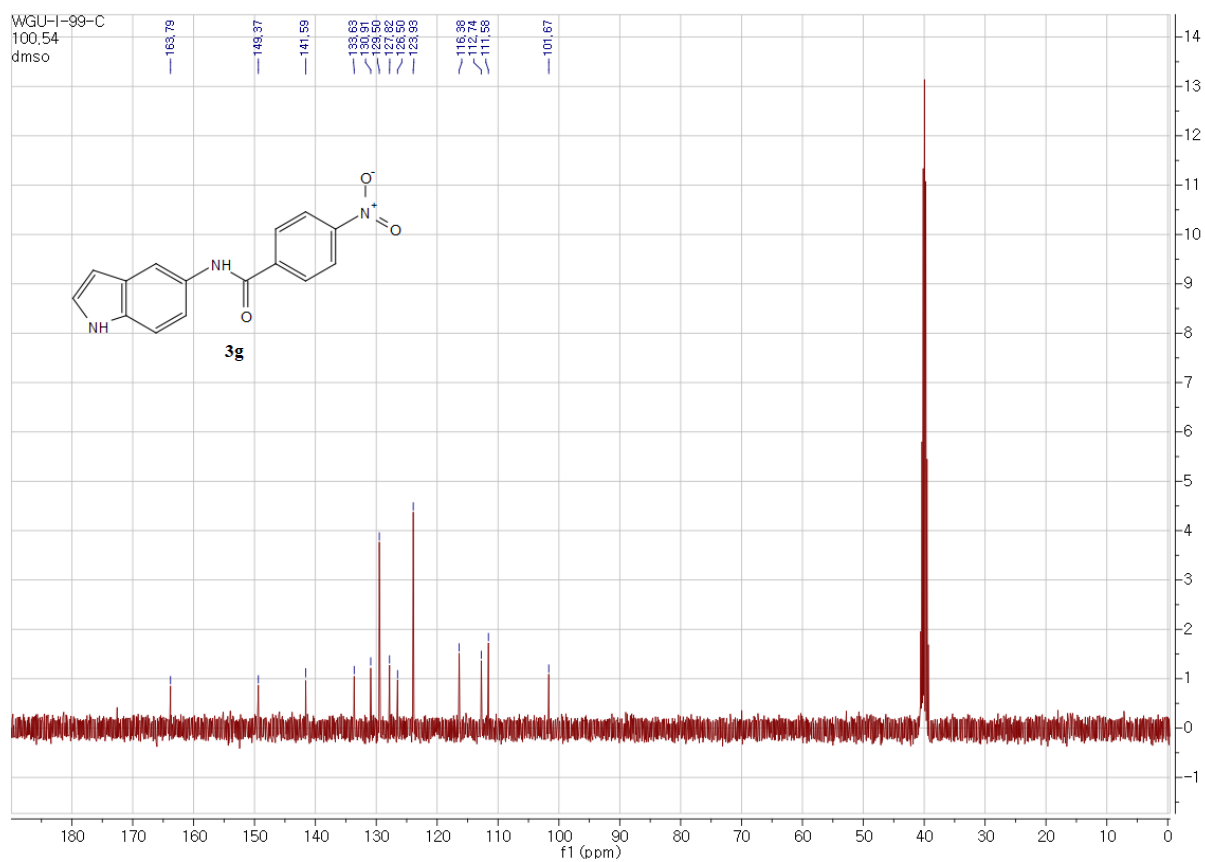

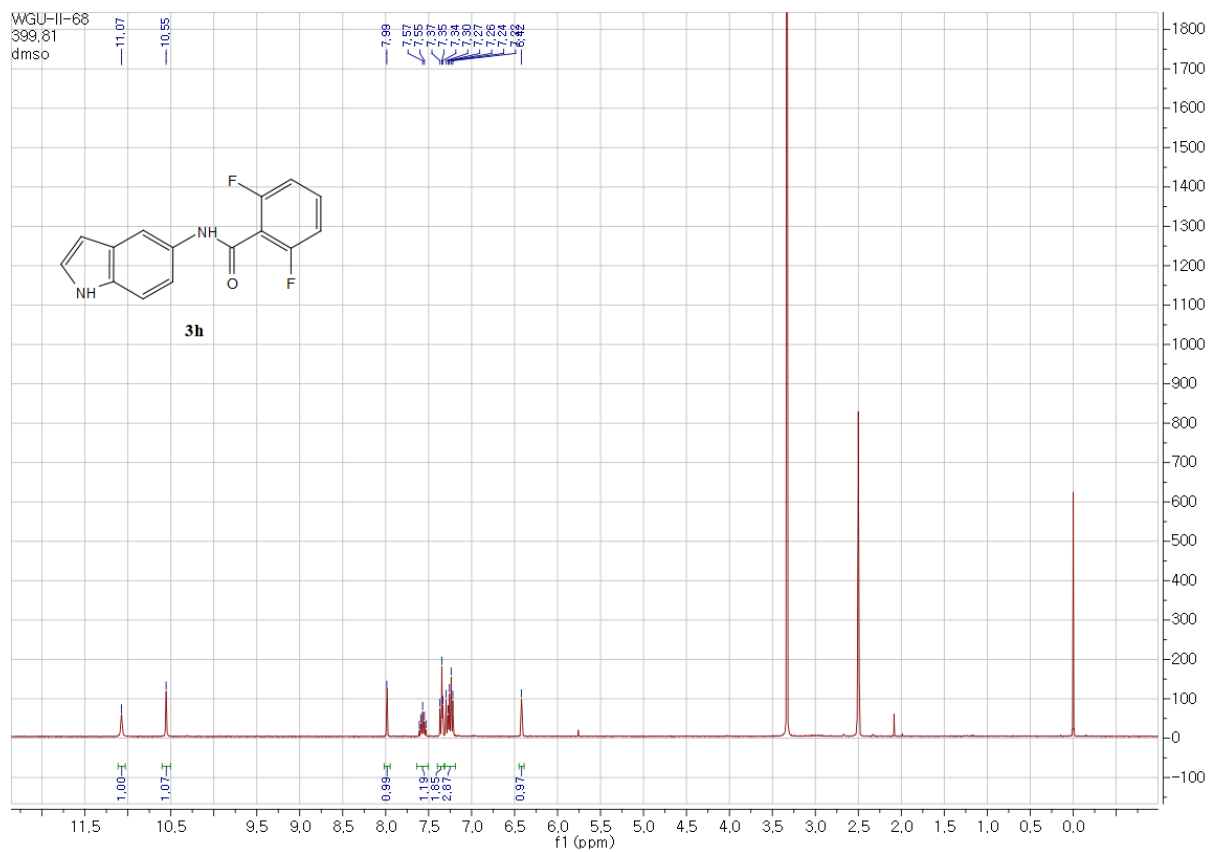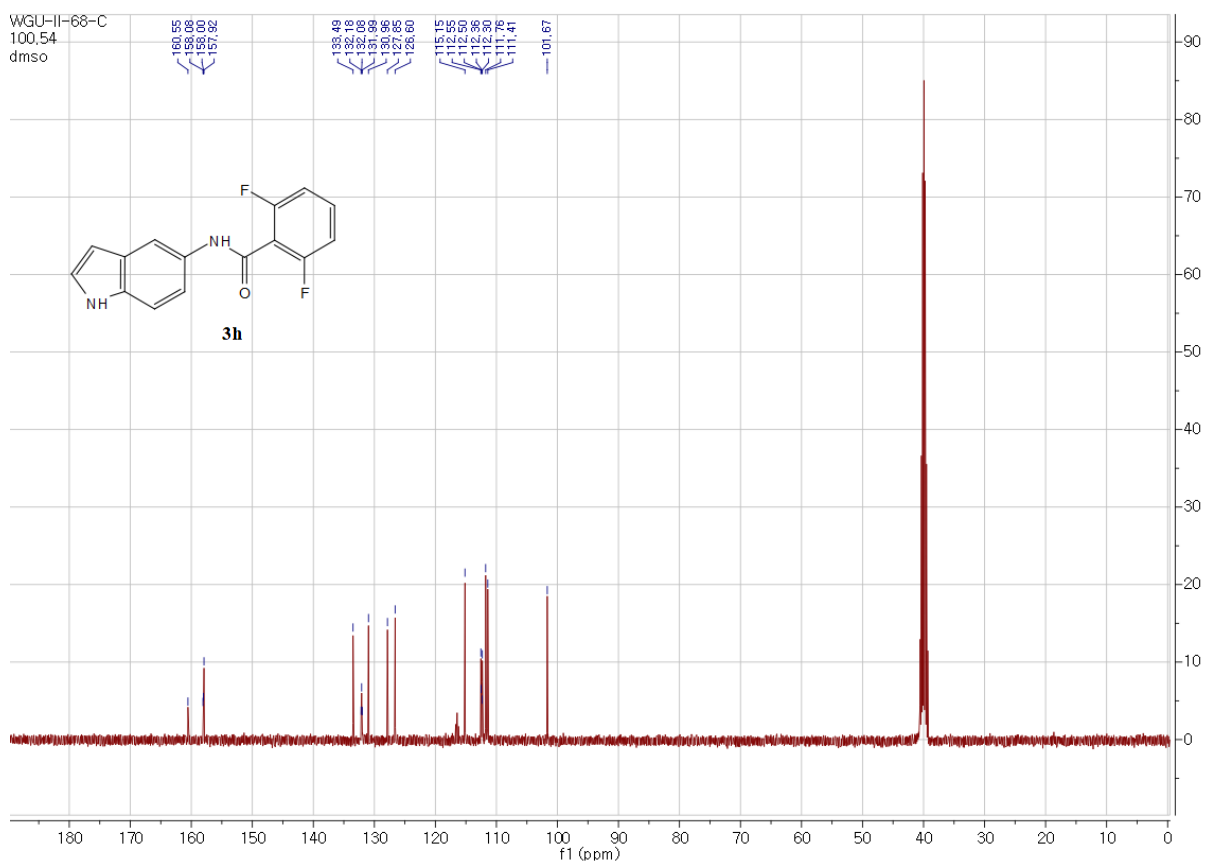

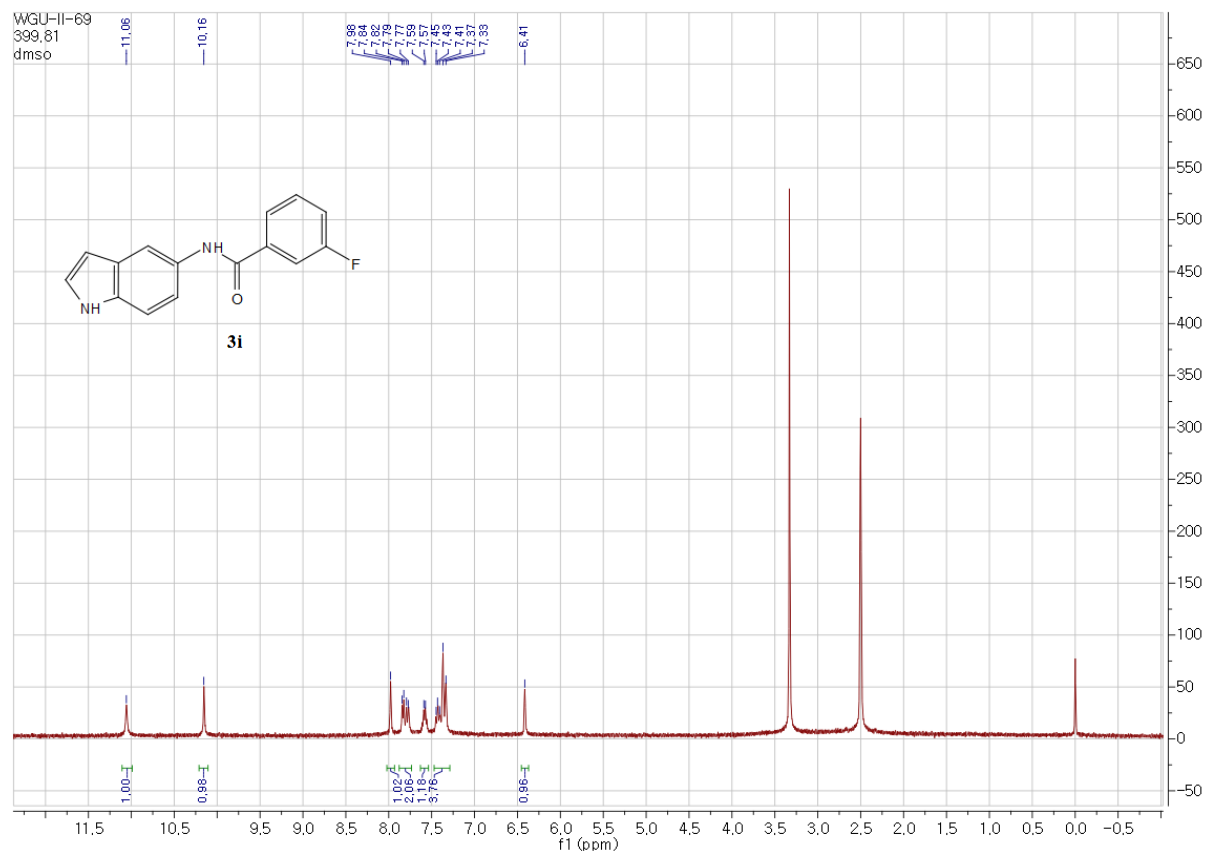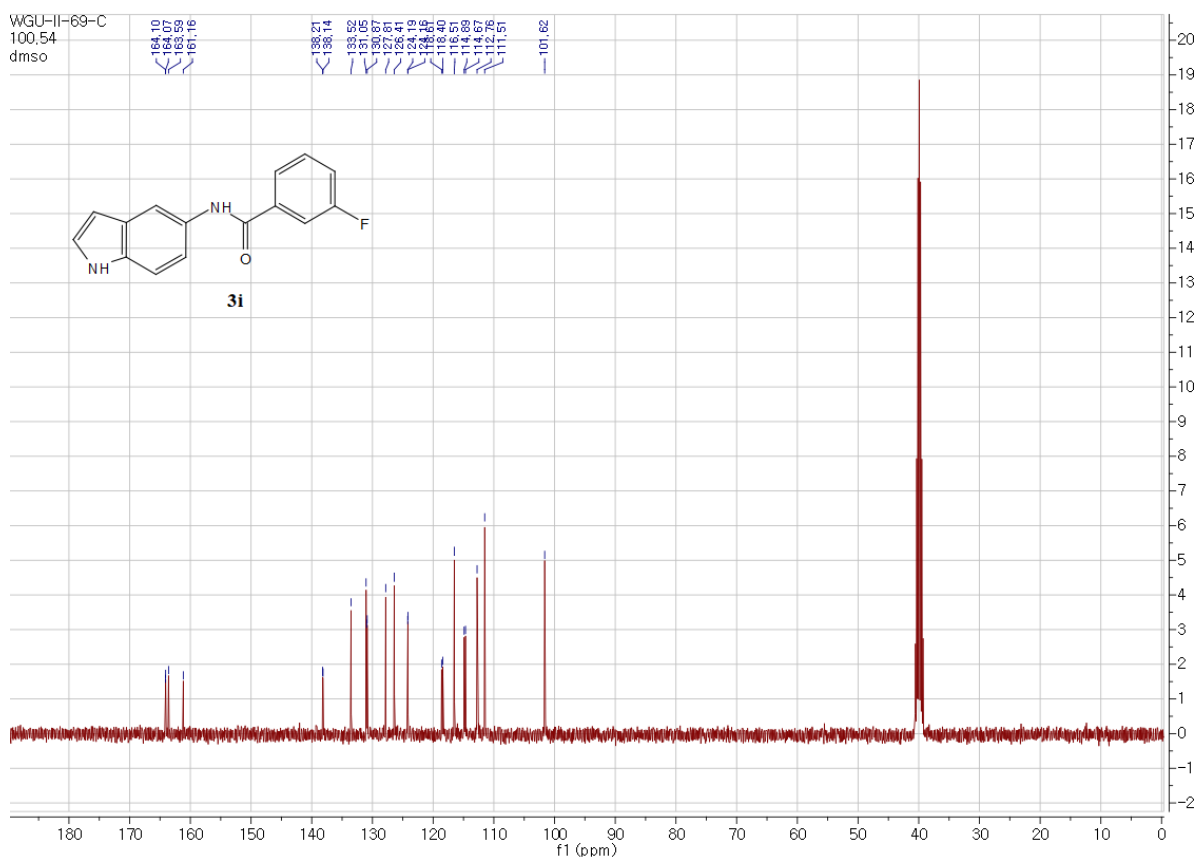

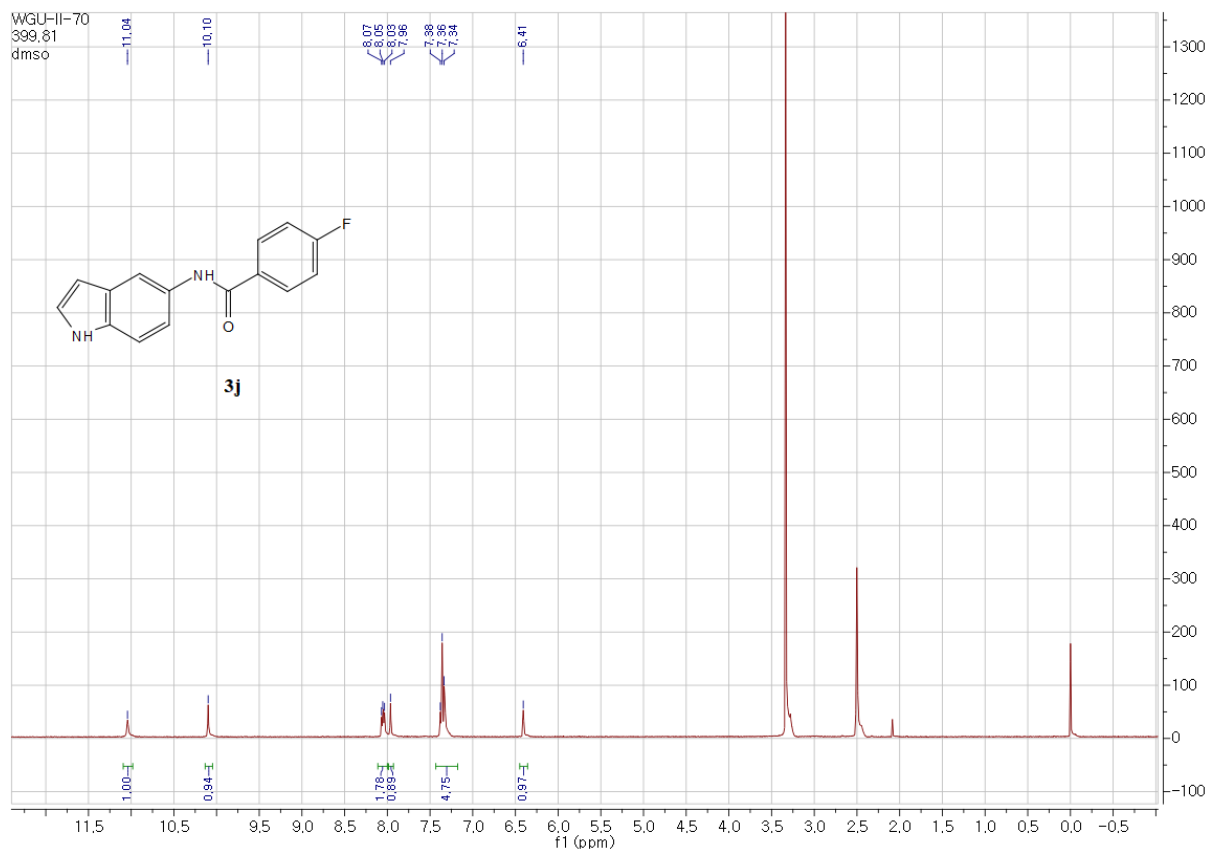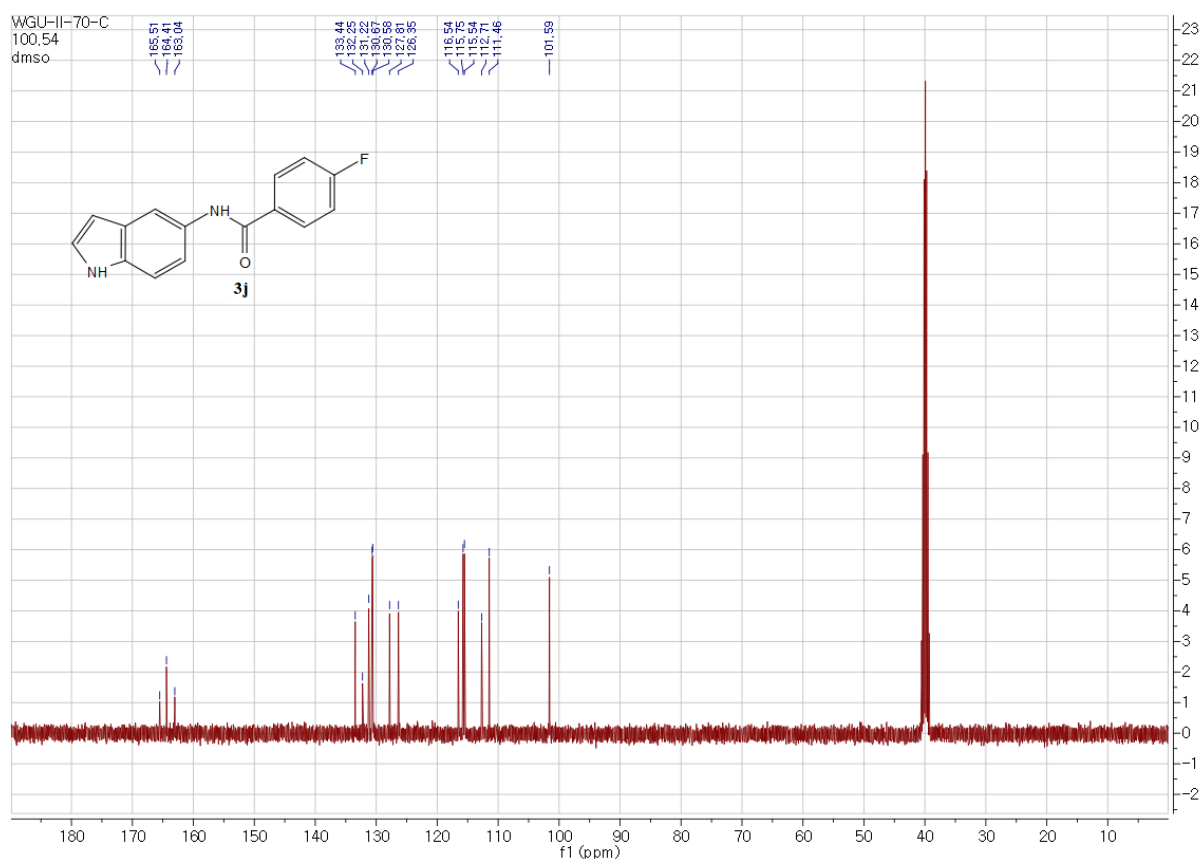

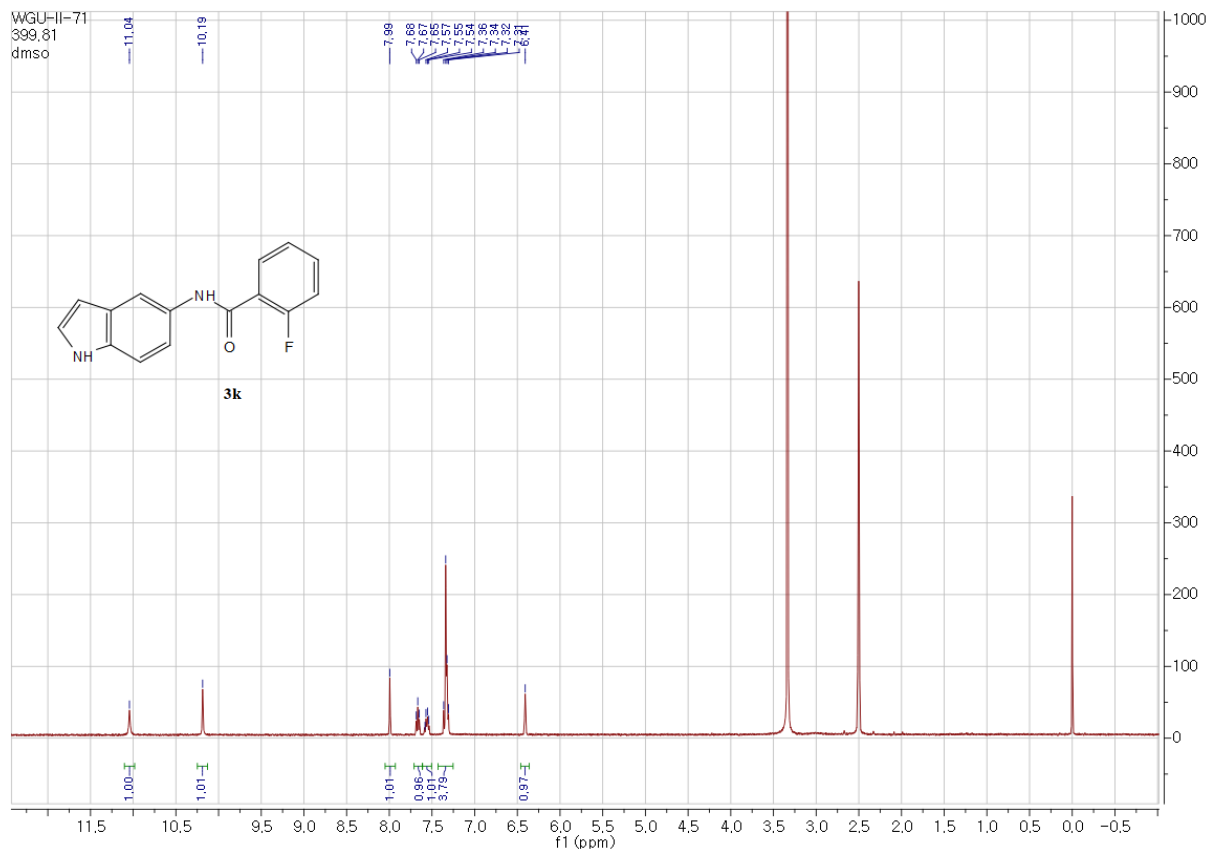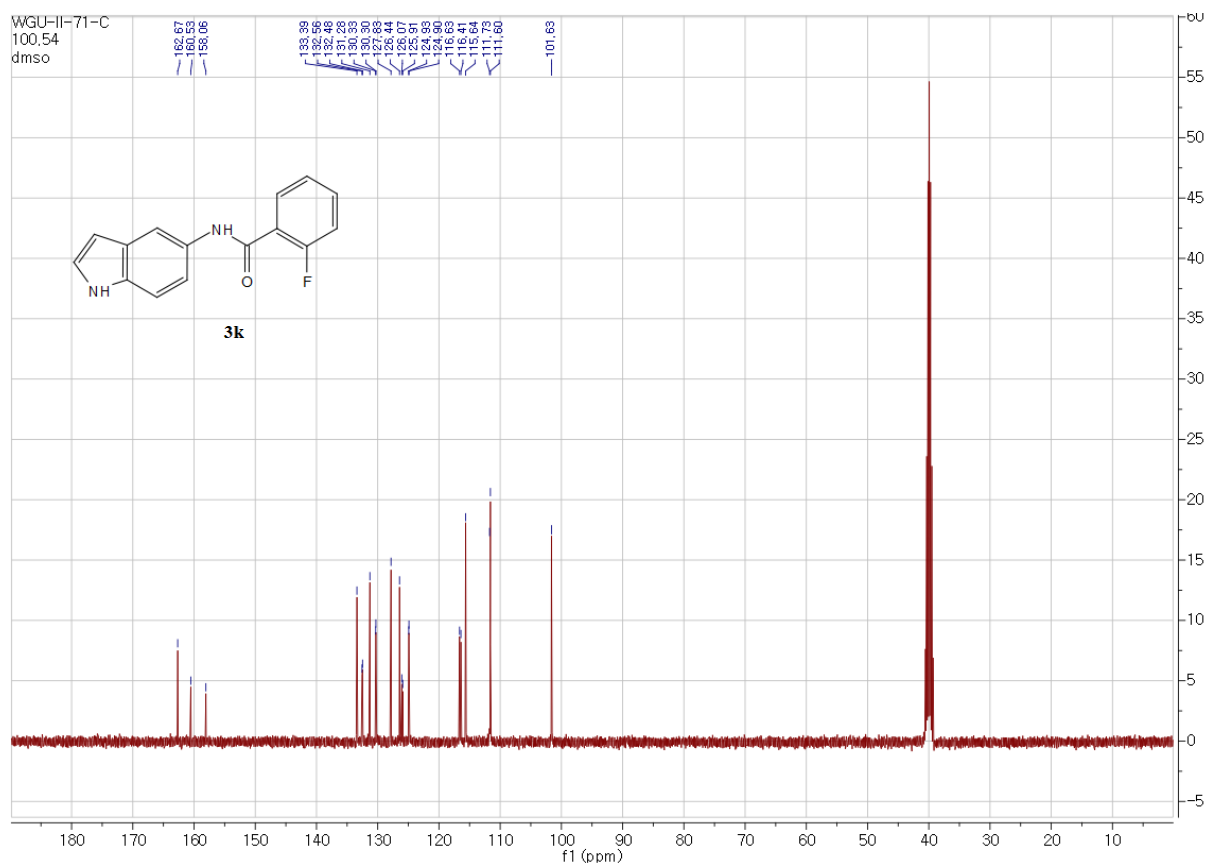

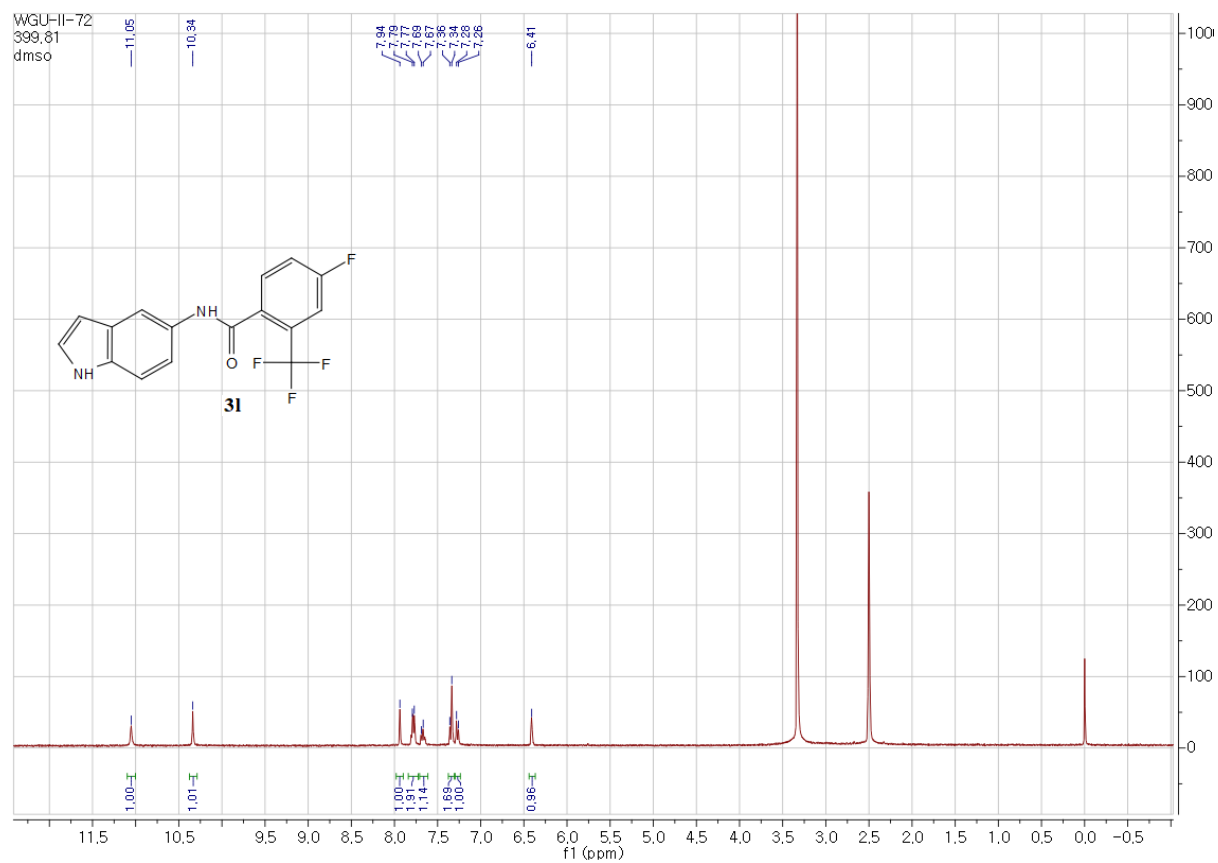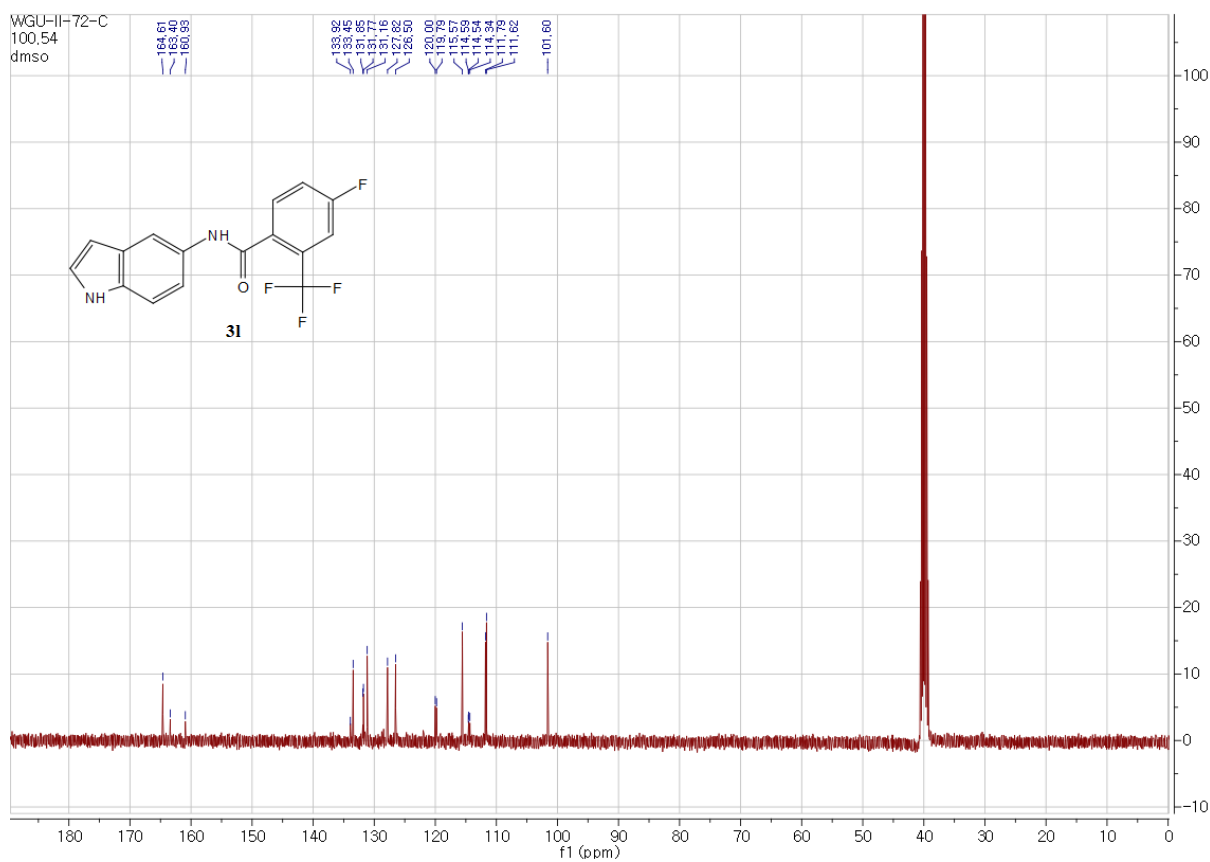

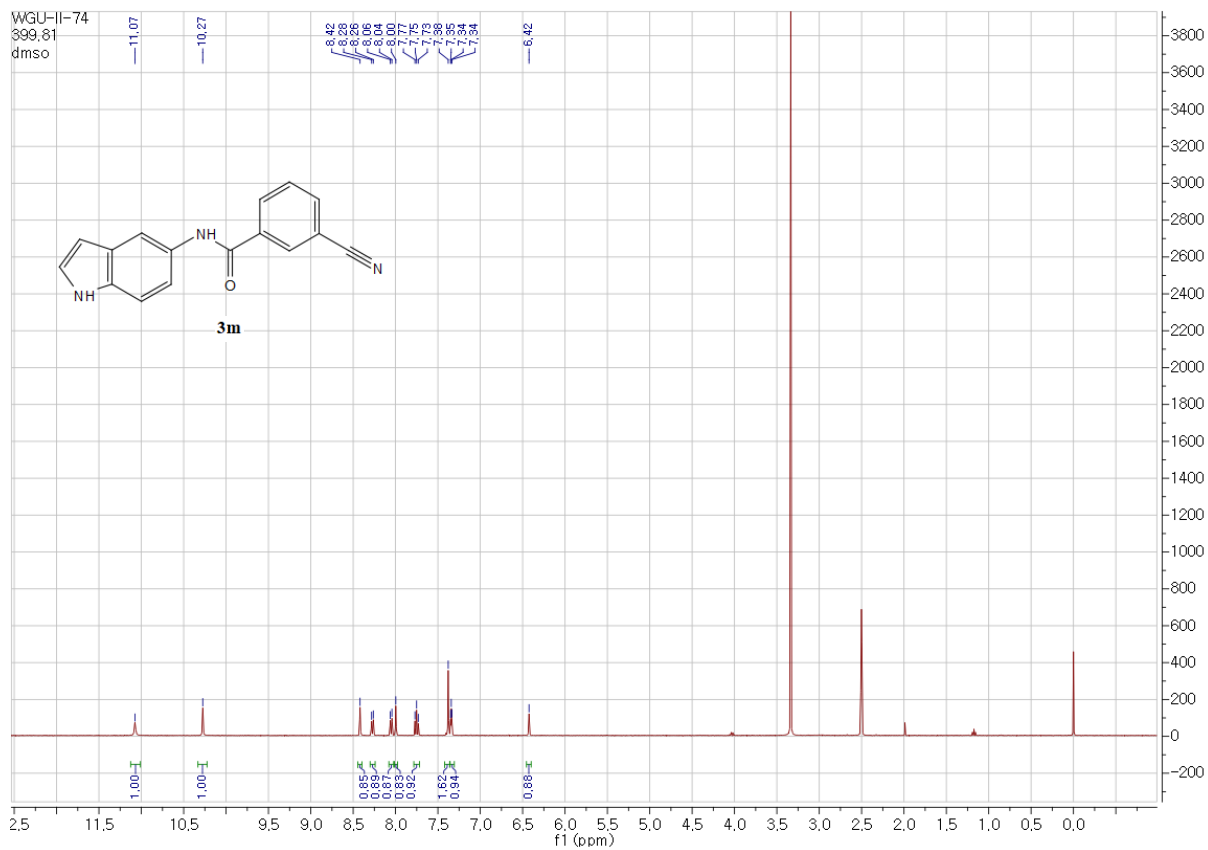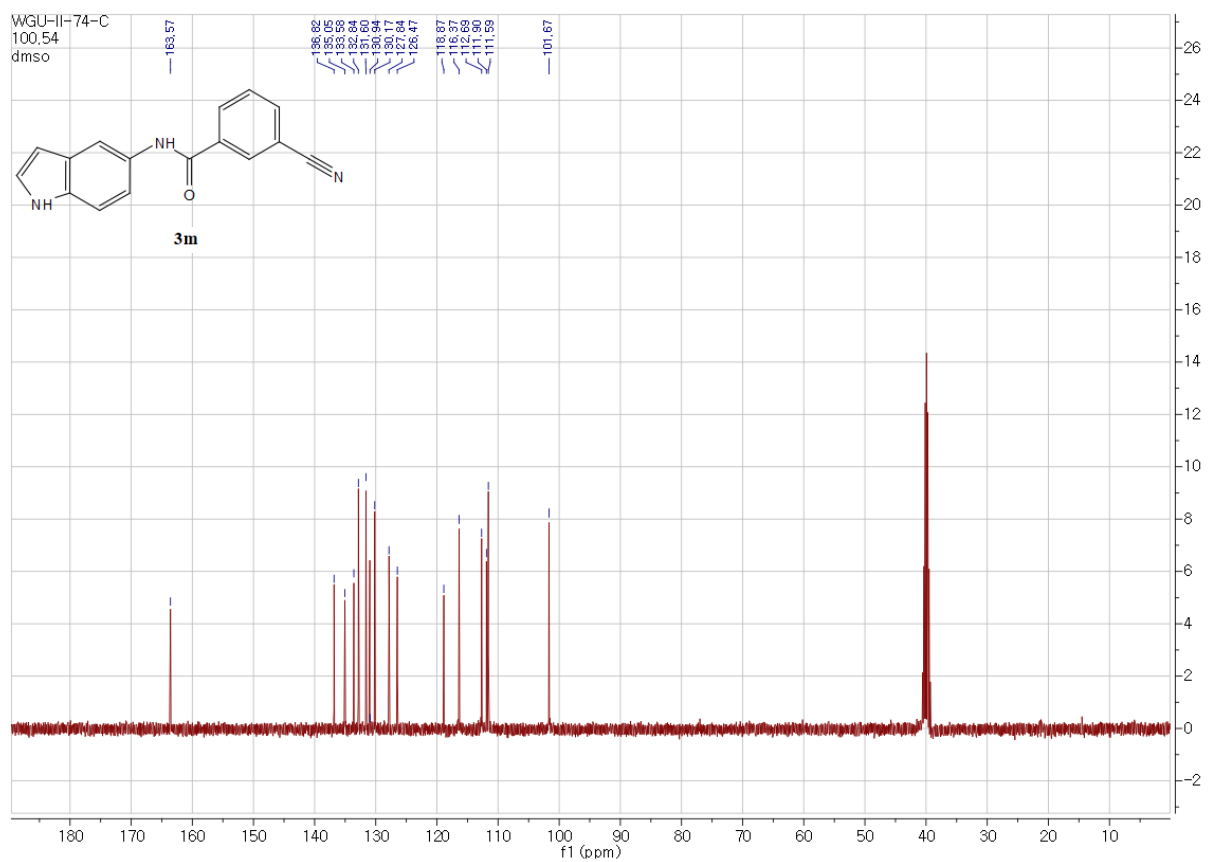

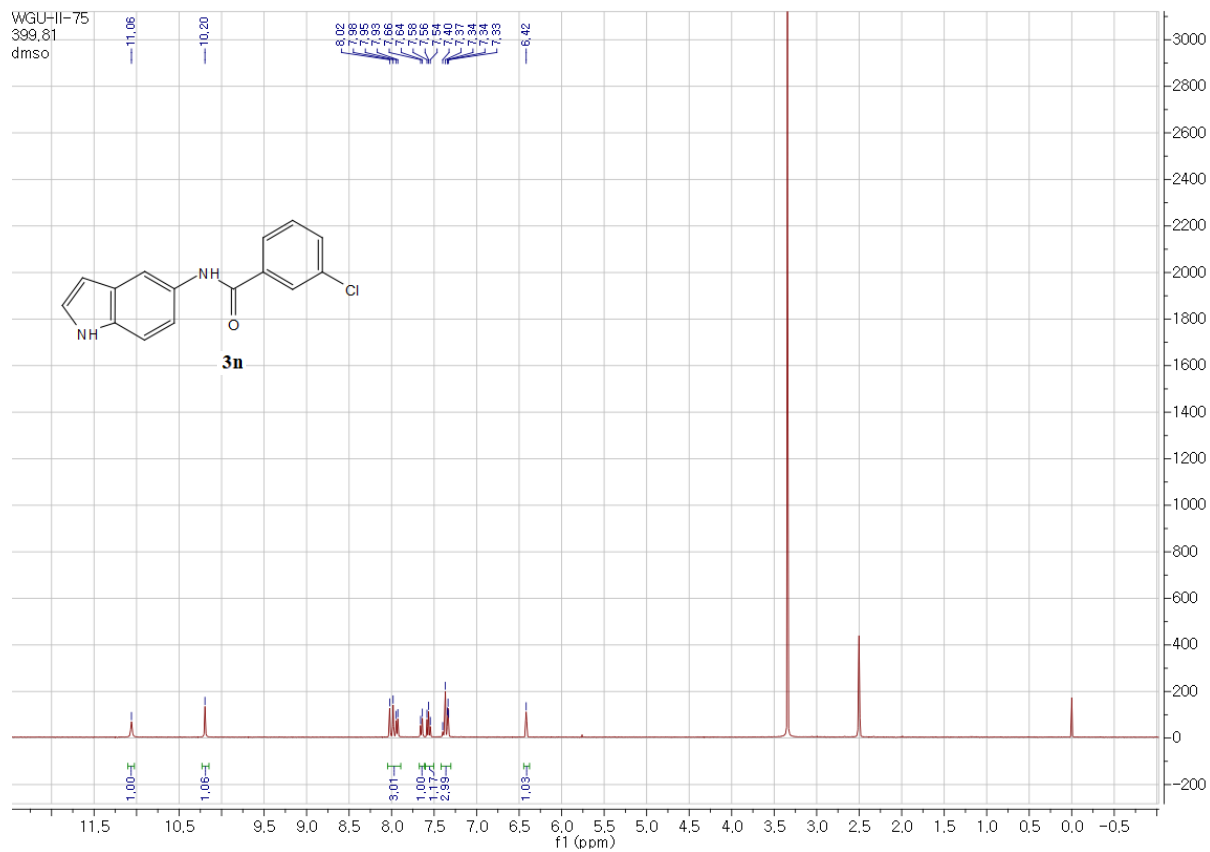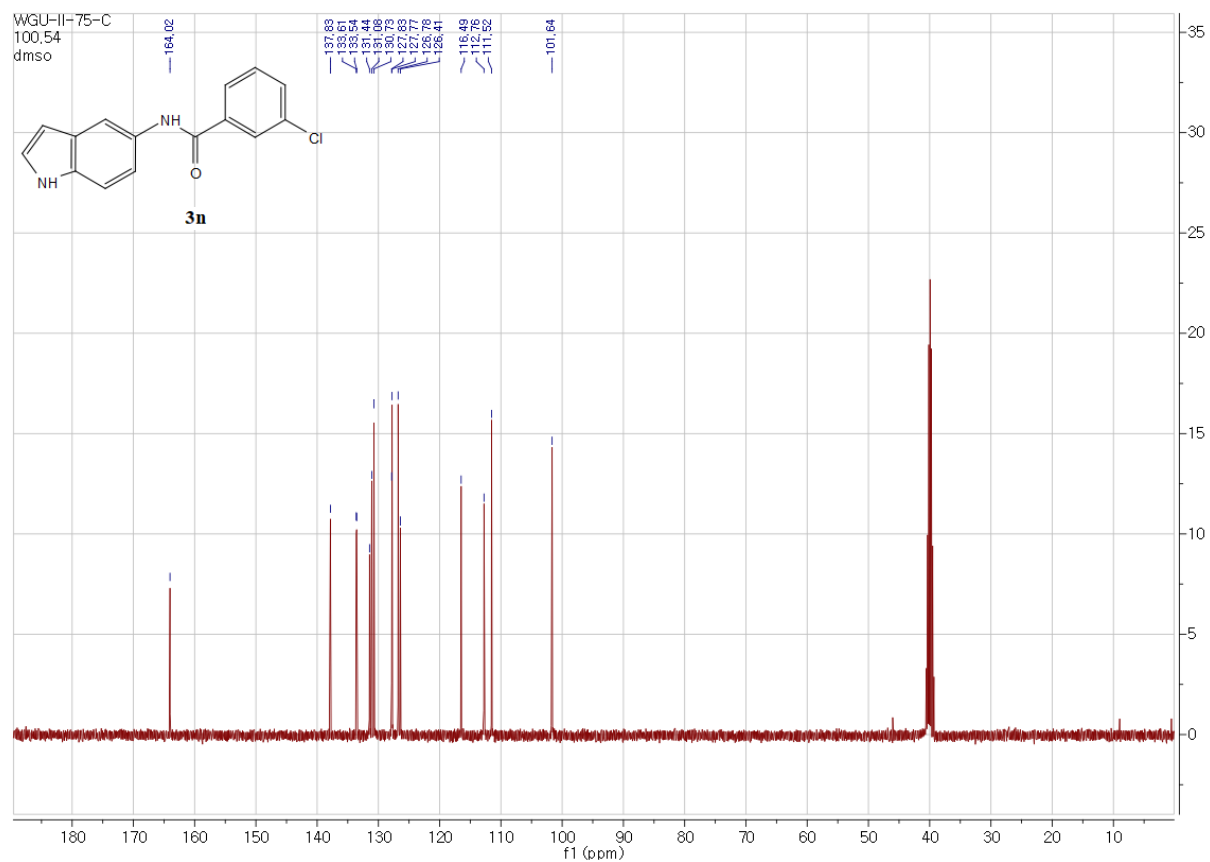



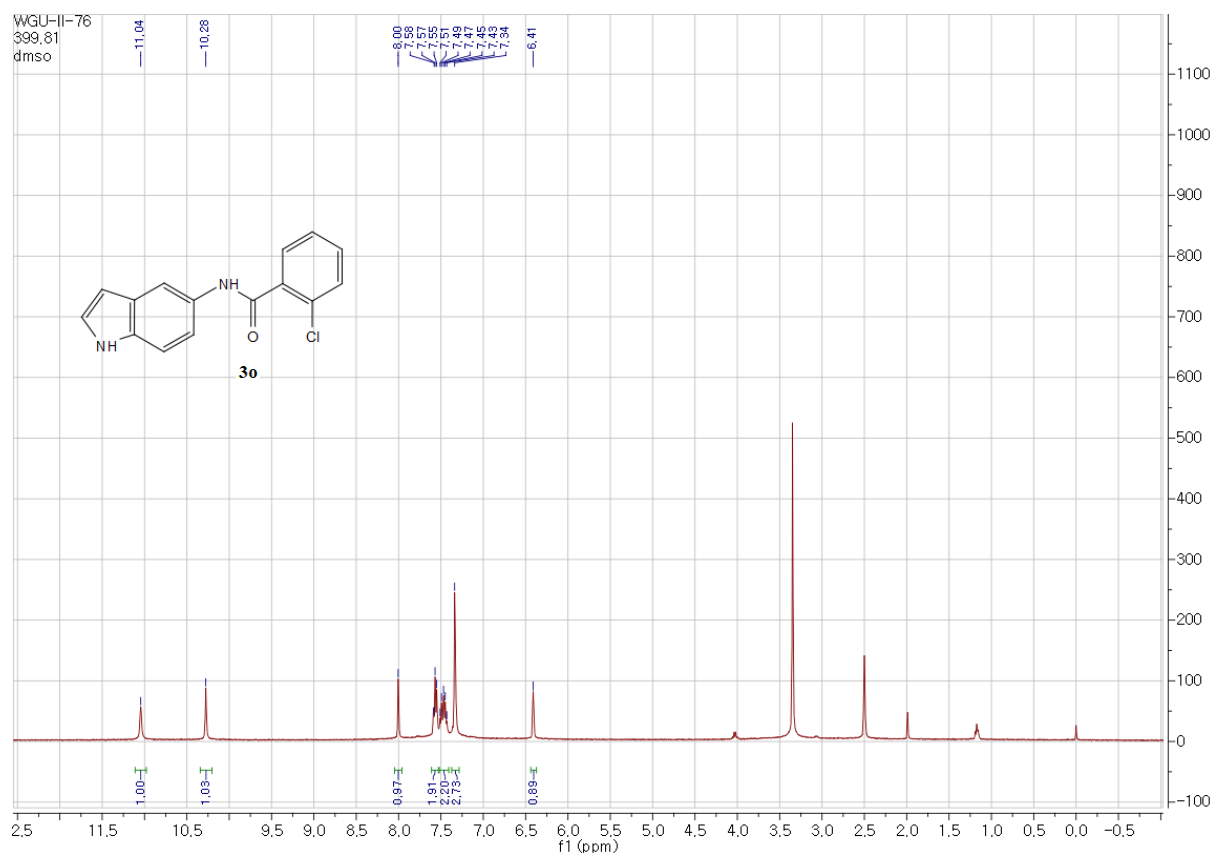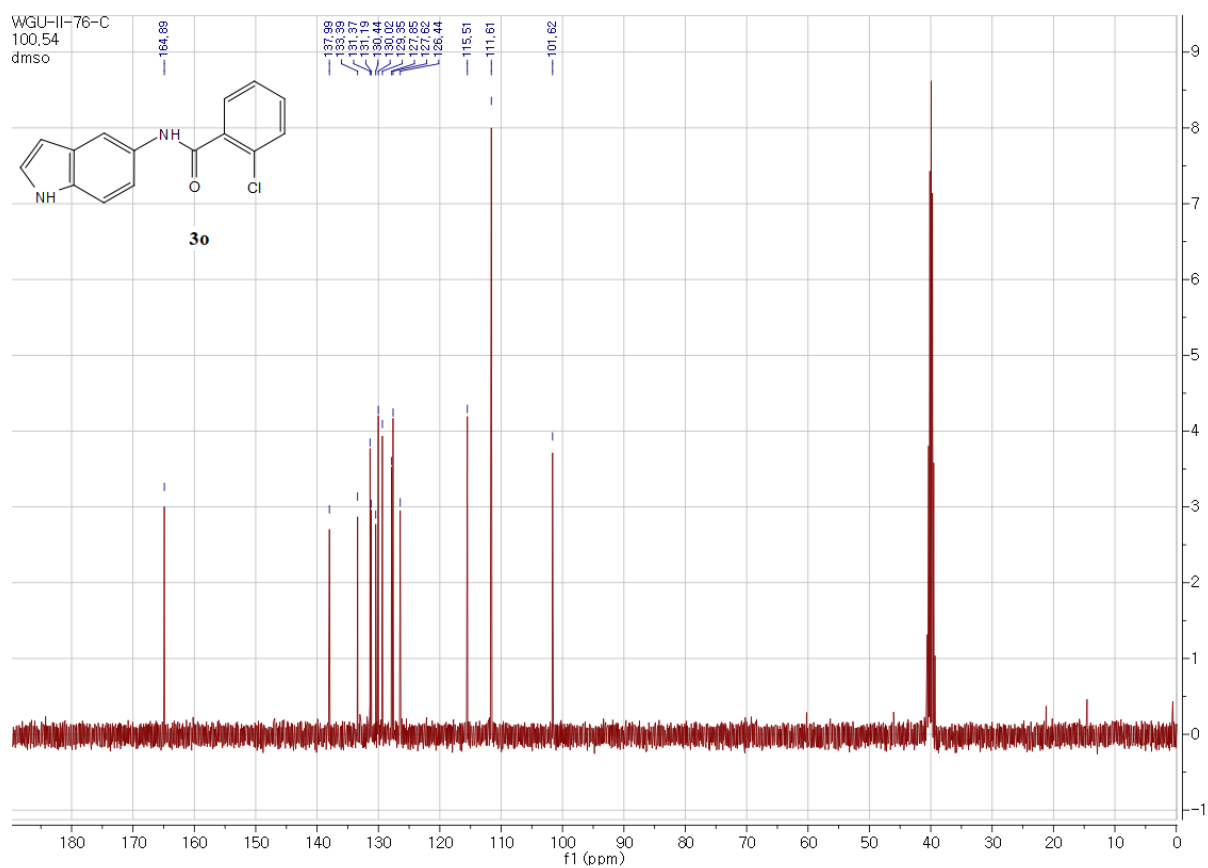

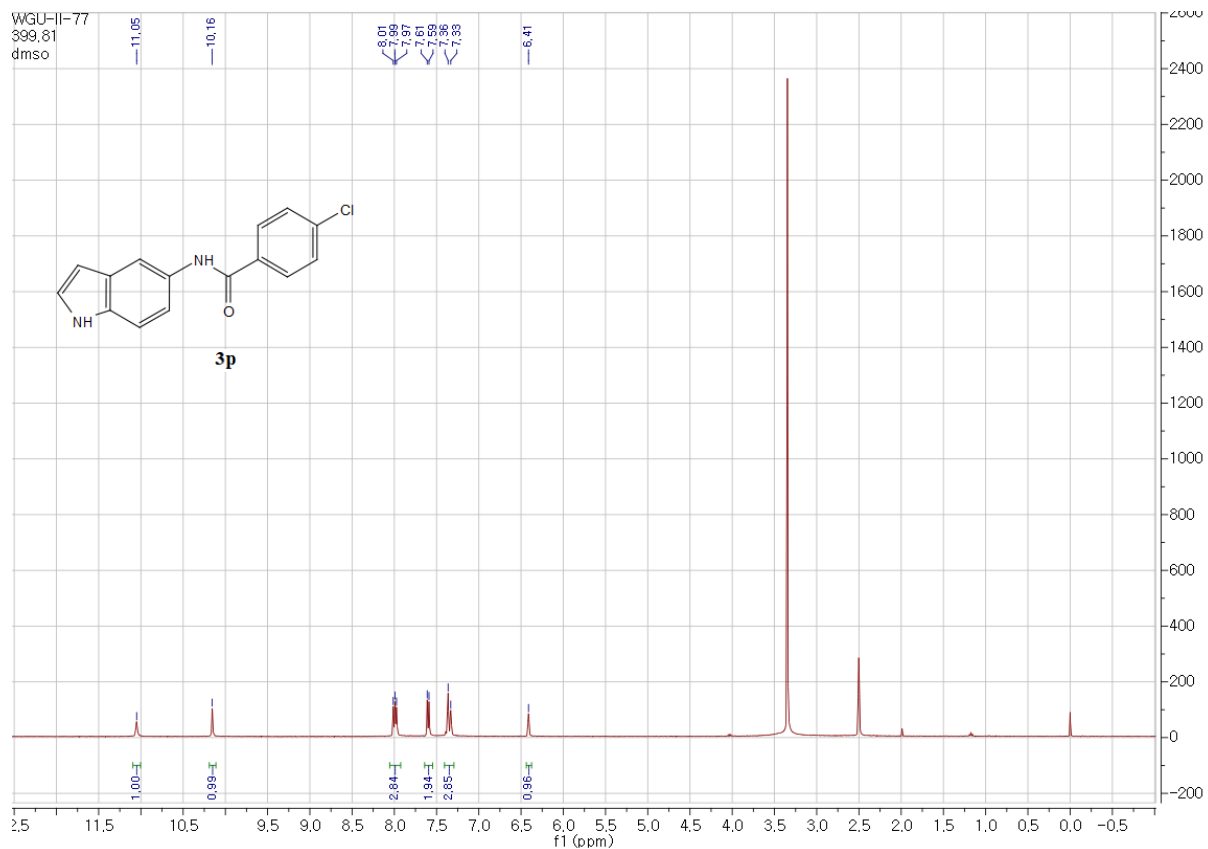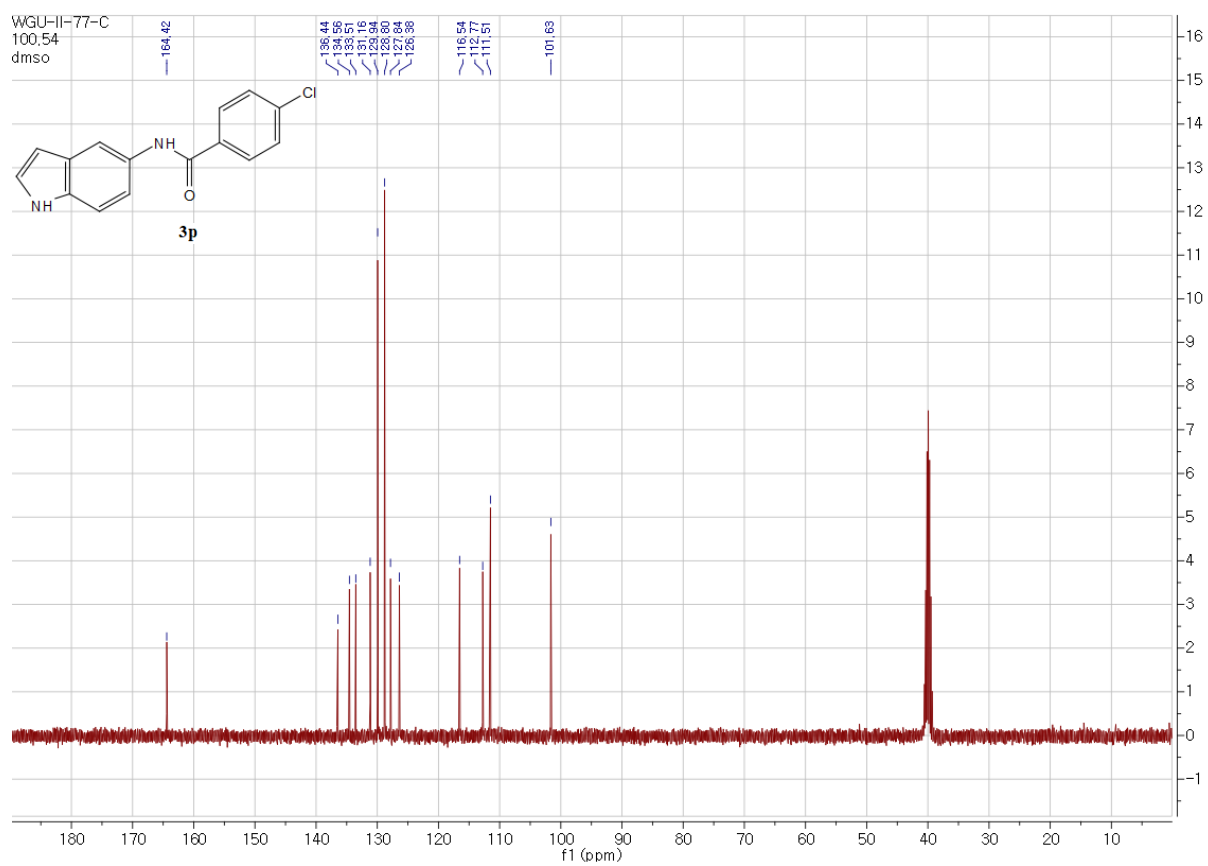

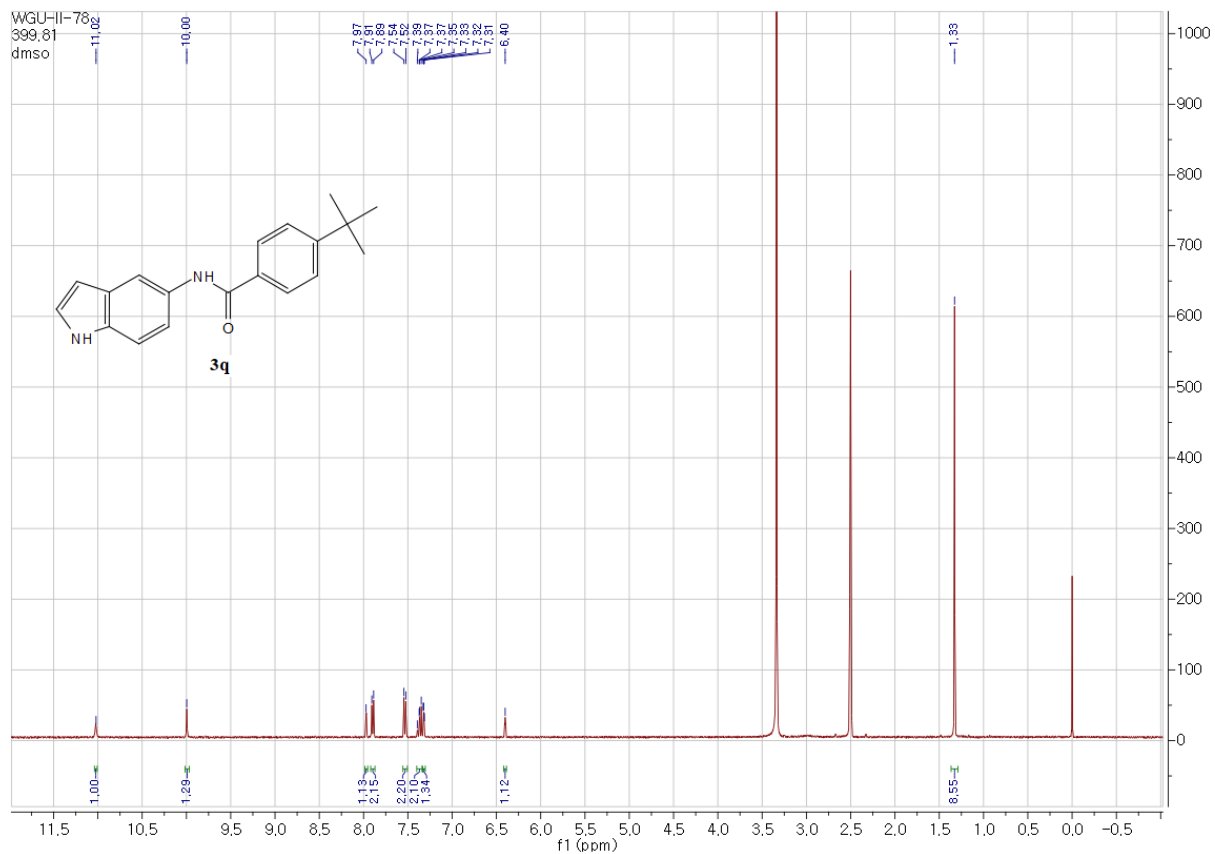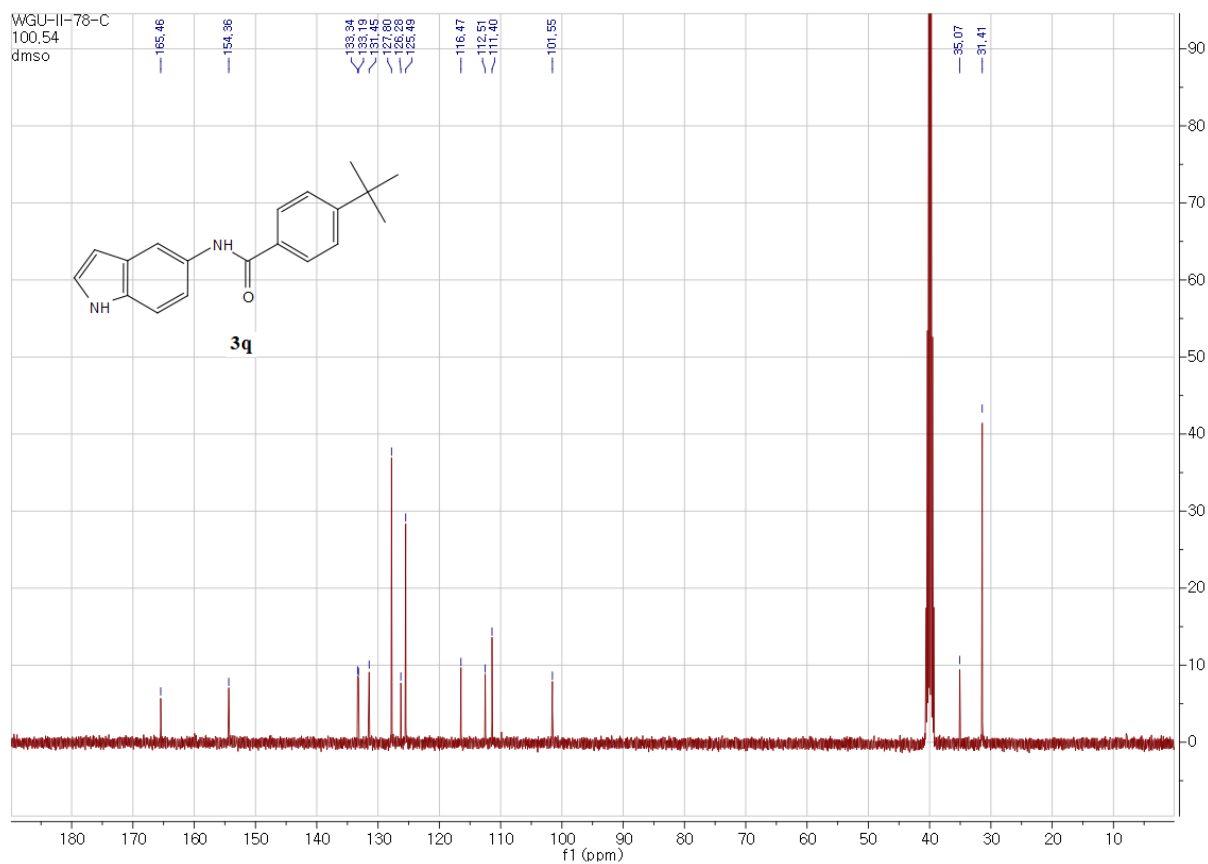

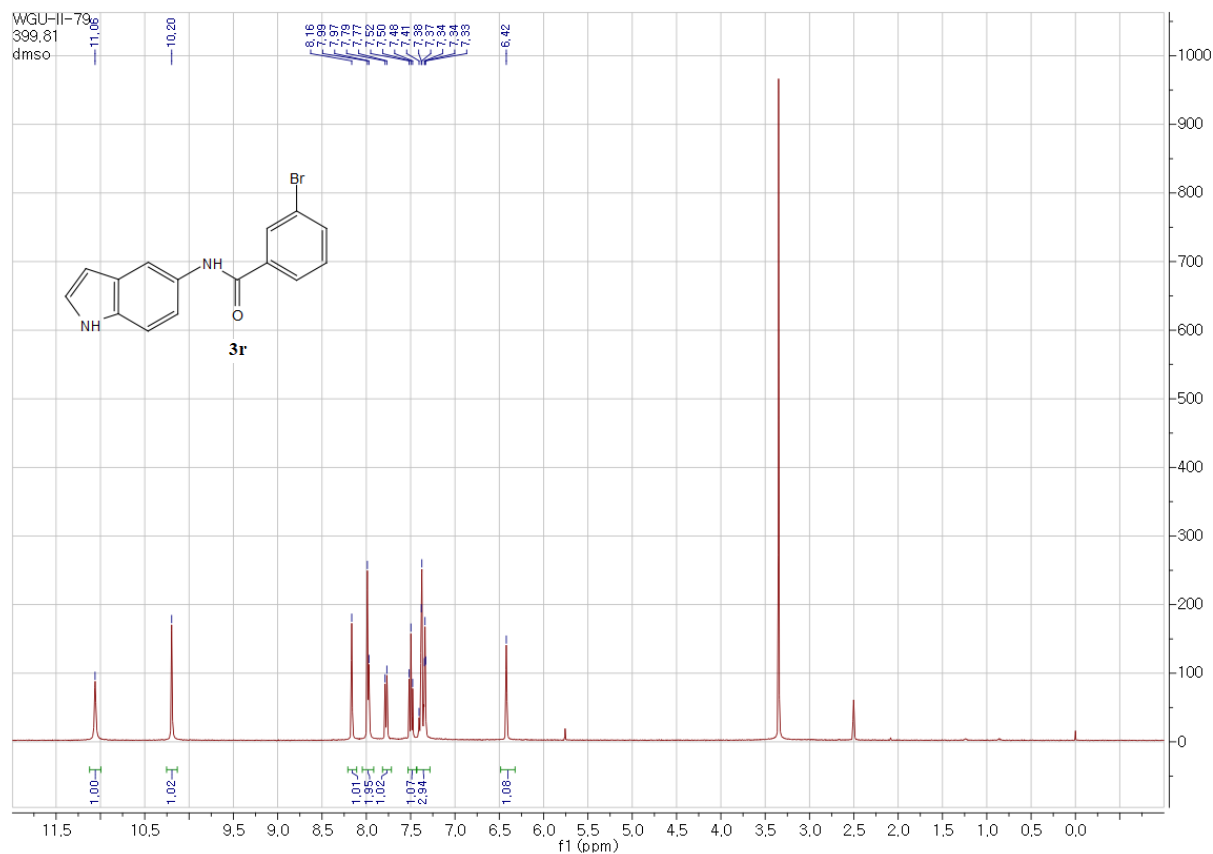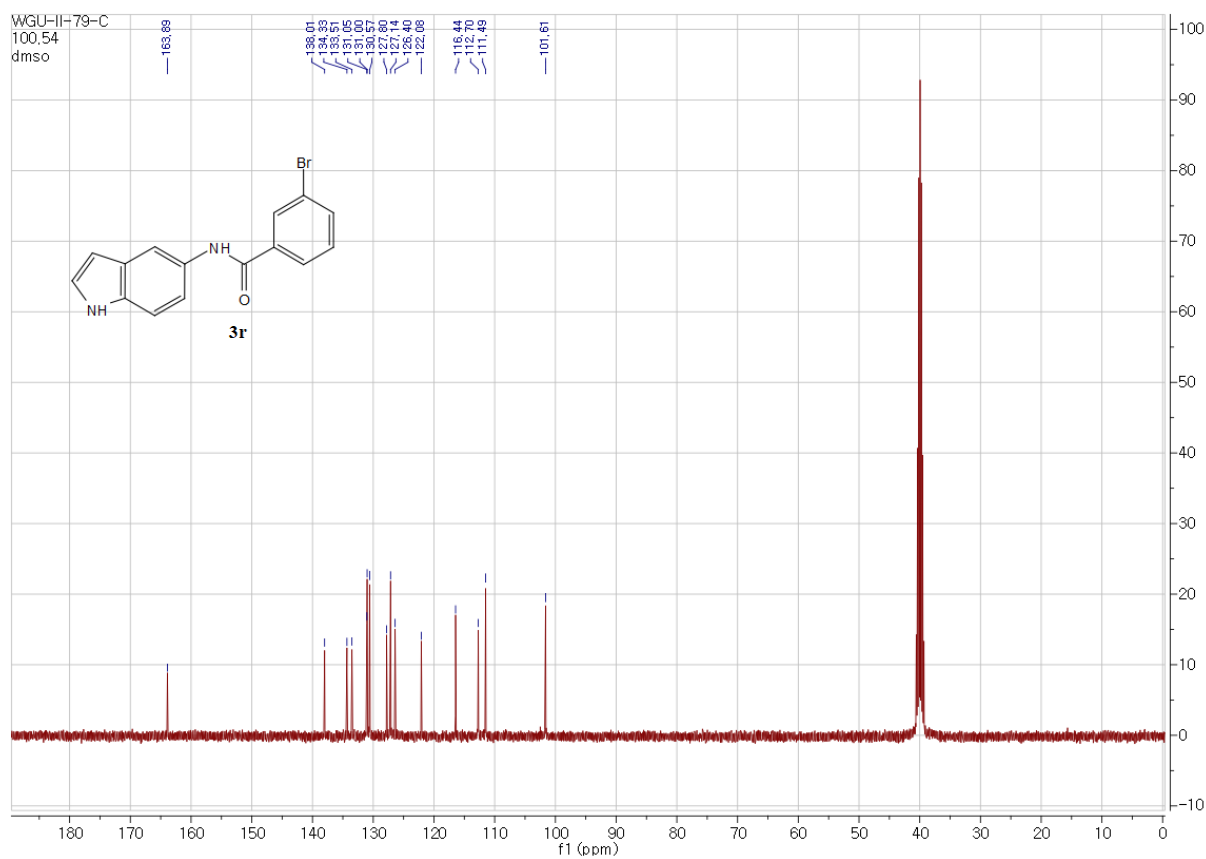

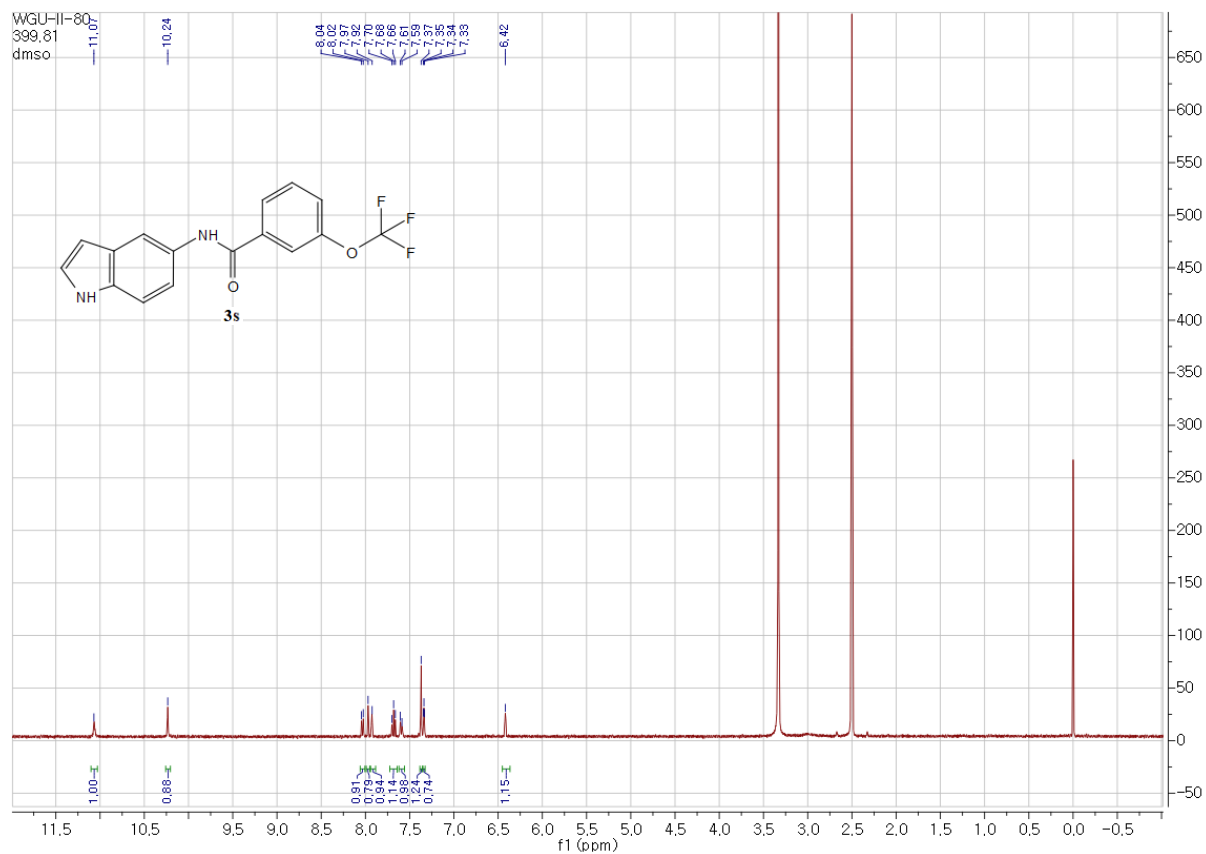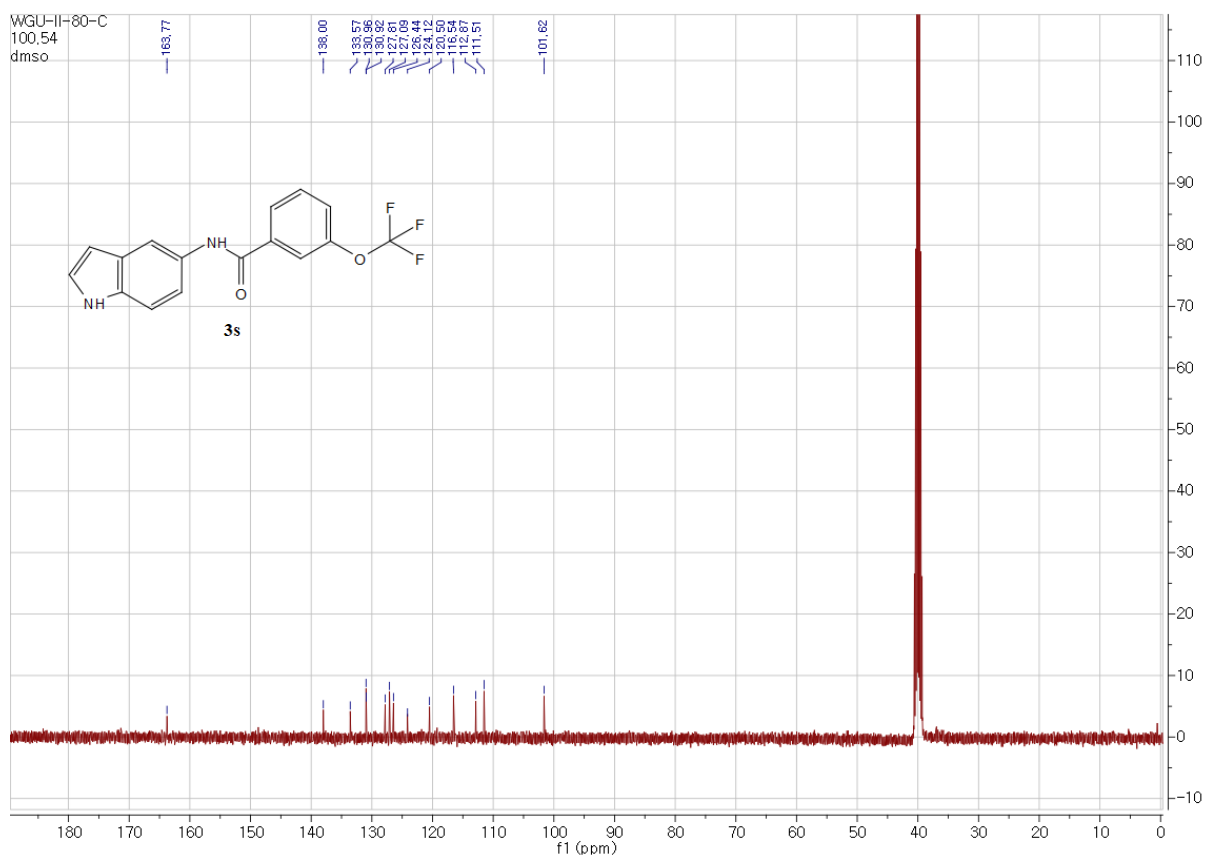

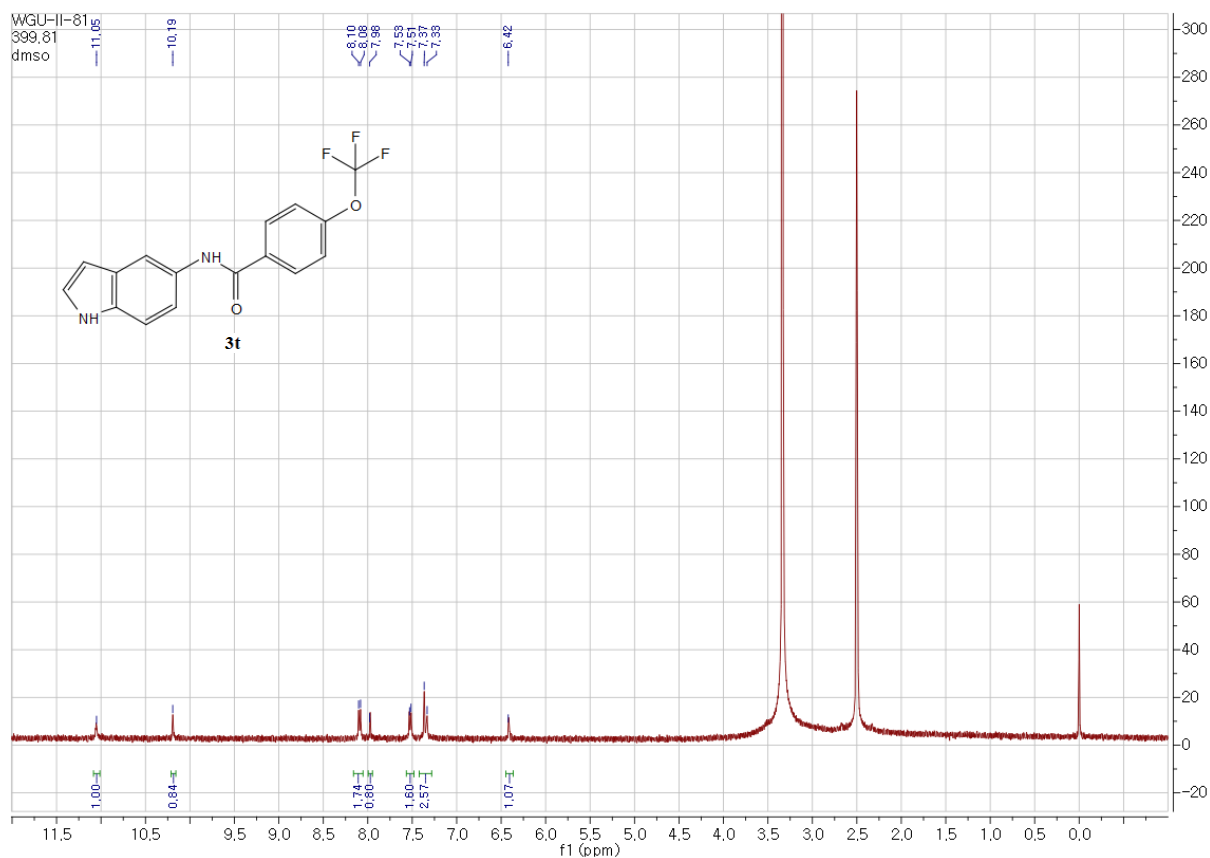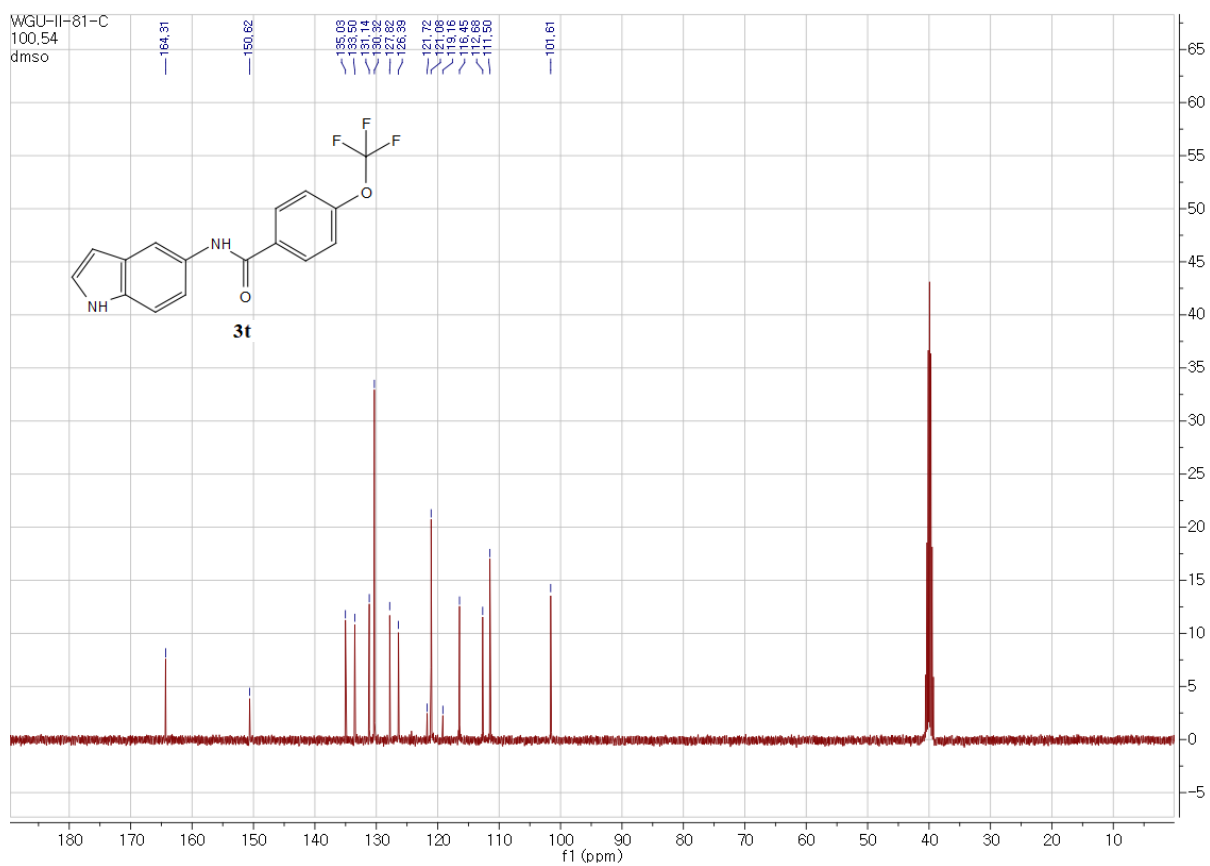

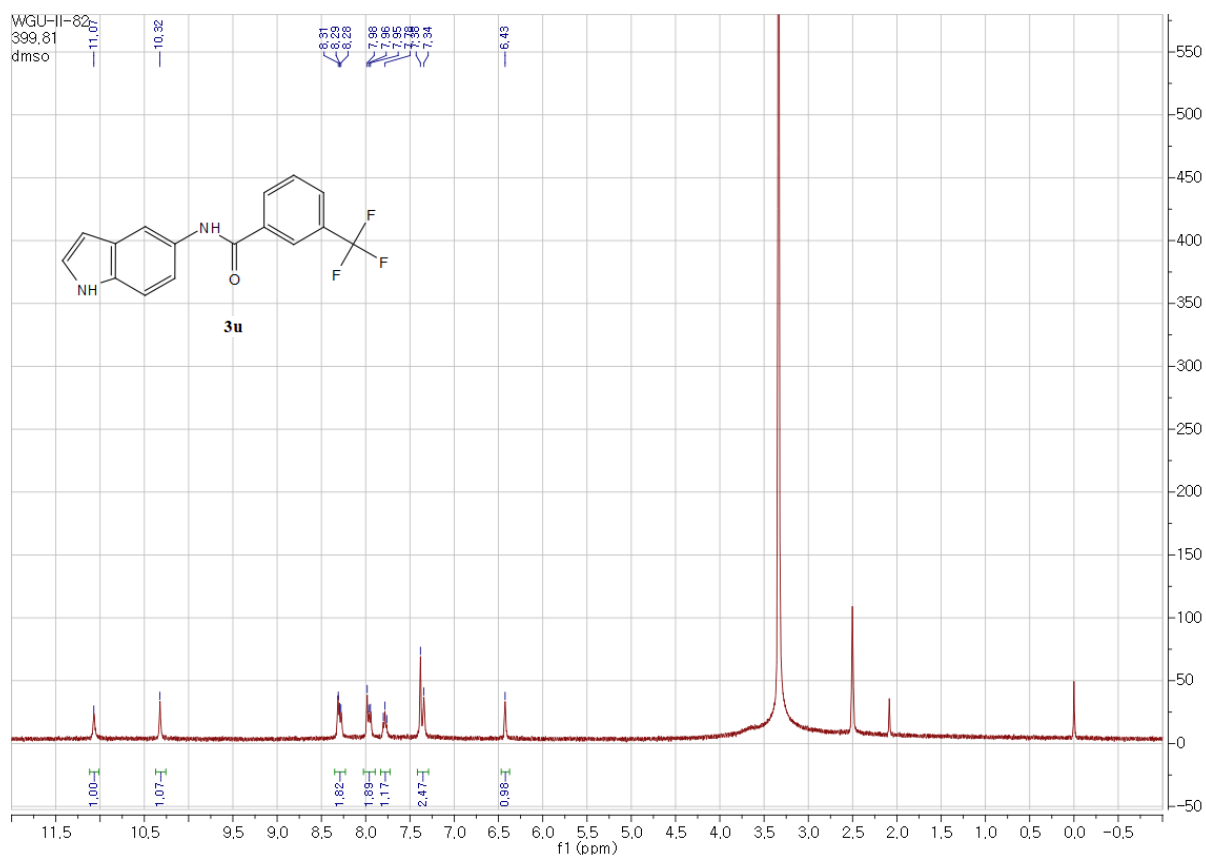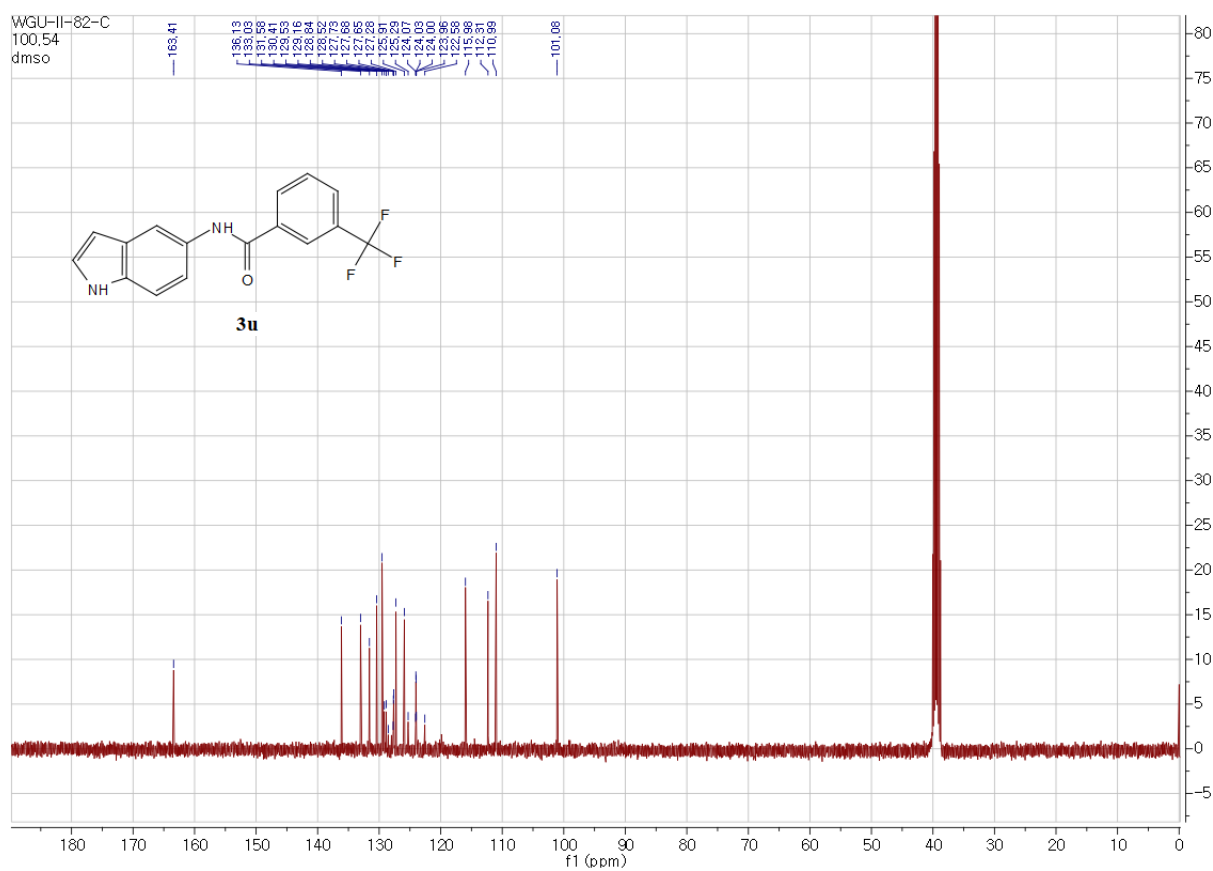

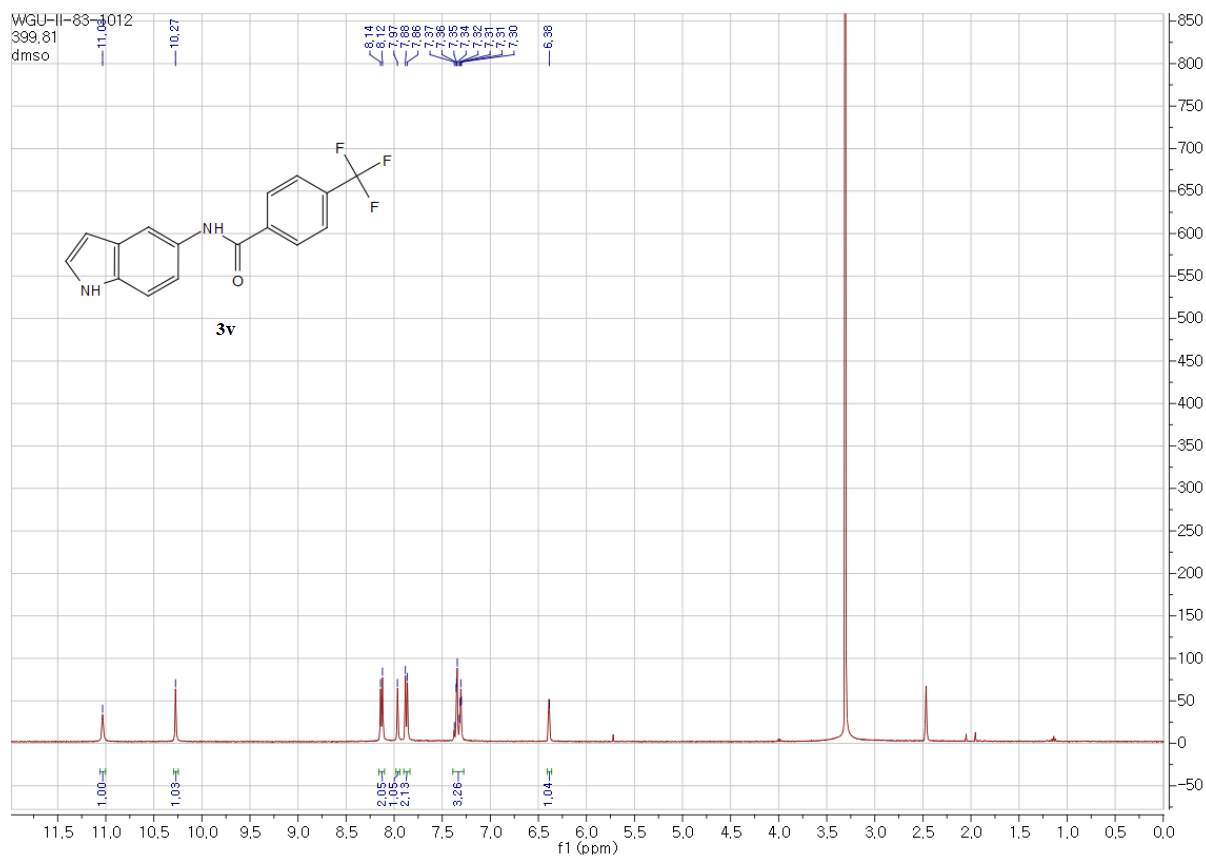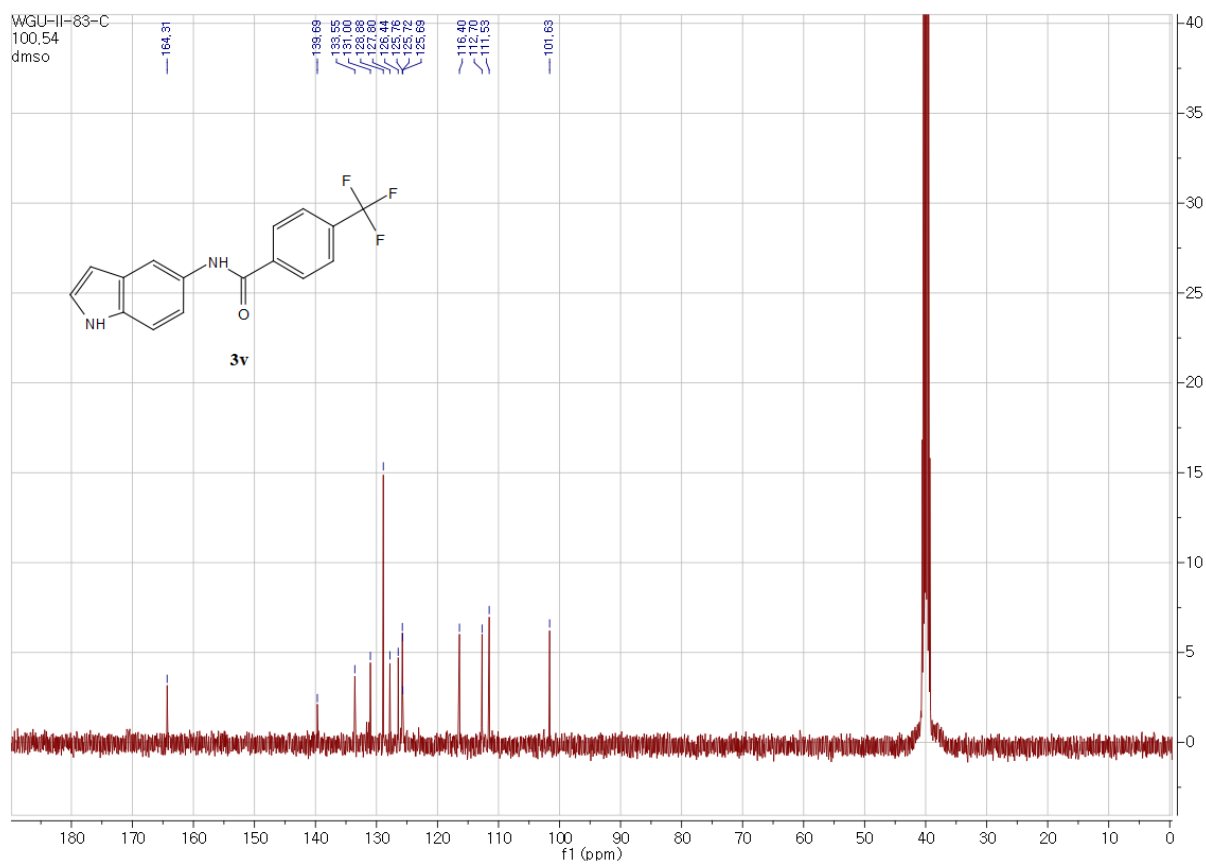



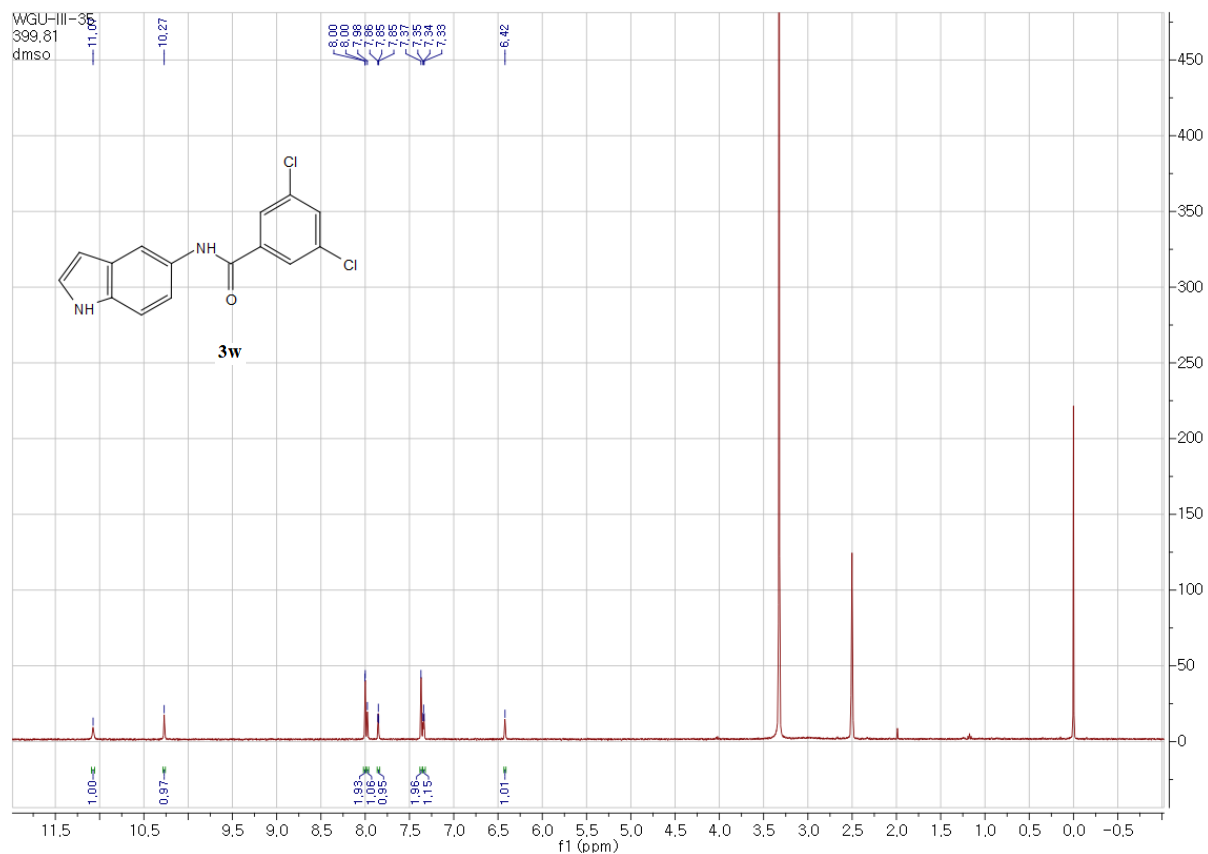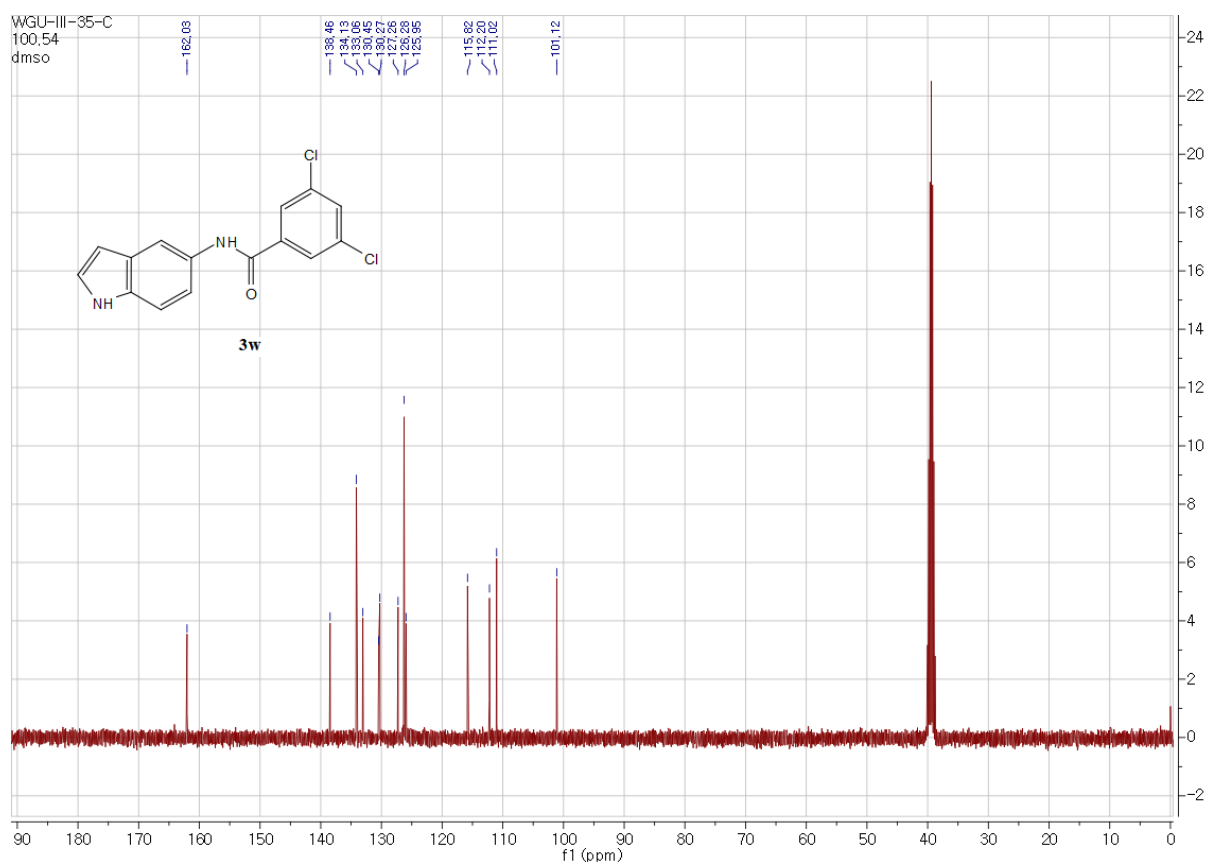

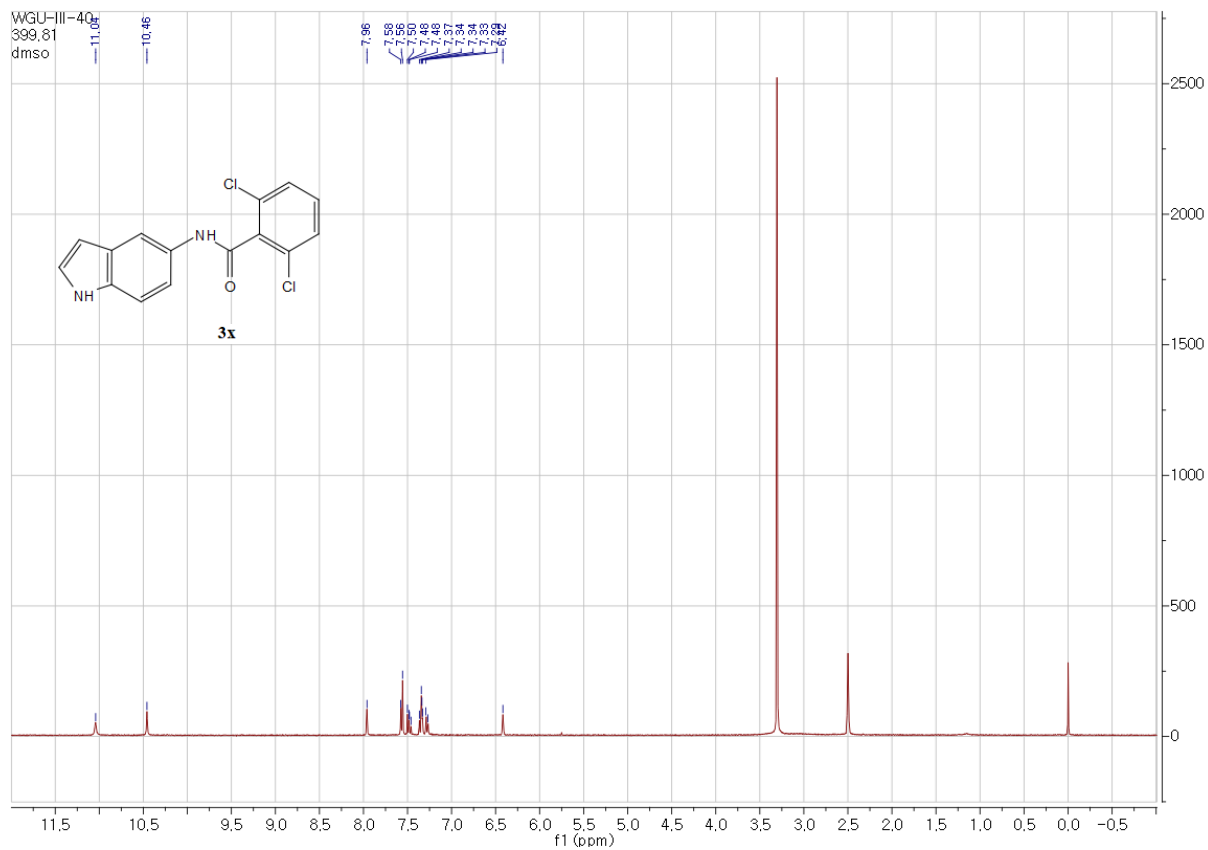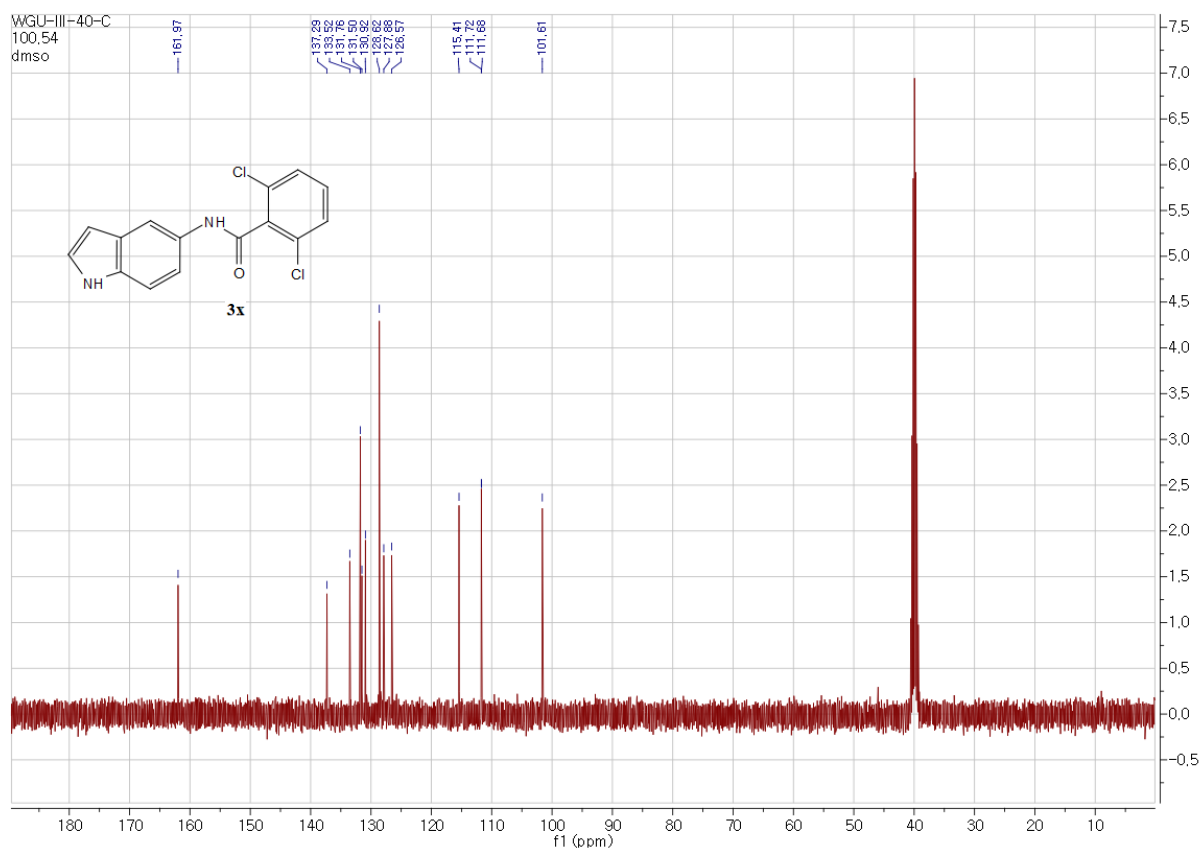

### 3. HPLC charts

|   | Name | Retention Time (min) | Purity1 Angle | Purity1 Threshold | PDA Match1 Spect. Name | PDA Match1 Angle | PDA Match1 Threshold | PDA Match1 Lib. Name | Area (μV*sec) | % Area | Height (μV) | Int Type | Amount |
|---|------|----------------------|---------------|-------------------|------------------------|------------------|----------------------|----------------------|---------------|--------|-------------|----------|--------|
| 1 |      | 10.468               |               |                   |                        |                  |                      |                      | 21369342      | 99.65  | 2667895     | bb       |        |
| 2 |      | 12.999               |               |                   |                        |                  |                      |                      | 74866         | 0.35   | 8142        | bb       |        |

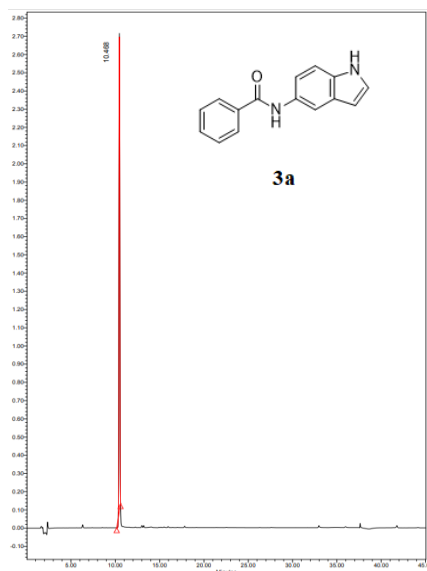

|   | Name | Retention Time (min) | Purity1 Angle | Purity1 Threshold | PDA Match1 Spect. Name | PDA Match1 Angle | PDA Match1 Threshold | PDA Match1 Lib. Name | Area (μV*sec) | % Area | Height (μV) | Int Type | Amount |
|---|------|----------------------|---------------|-------------------|------------------------|------------------|----------------------|----------------------|---------------|--------|-------------|----------|--------|
| 1 |      | 7.894                |               |                   |                        |                  |                      |                      | 372433        | 3.47   | 66153       | bb       |        |
| 2 |      | 11.570               |               |                   |                        |                  |                      |                      | 10218485      | 95.11  | 1487935     | bb       |        |
| 3 |      | 16.582               |               |                   |                        |                  |                      |                      | 65919         | 0.61   | 12858       | bb       |        |
| 4 |      | 18.601               |               |                   |                        |                  |                      |                      | 87183         | 0.81   | 19133       | bb       |        |

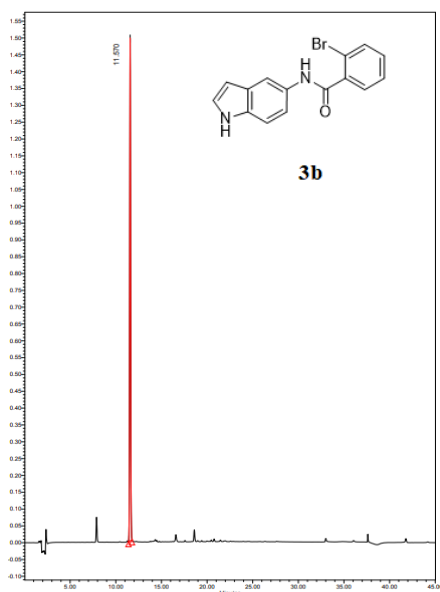

|   | Name | Retention Time (min) | Purity1 Angle | Purity1 Threshold | PDA Match1 Spect. Name | PDA Match1 Angle | PDA Match1 Threshold | PDA Match1 Lib. Name | Area (μV*sec) | % Area | Height (μV) | Int Type | Amount |
|---|------|----------------------|---------------|-------------------|------------------------|------------------|----------------------|----------------------|---------------|--------|-------------|----------|--------|
| 1 |      | 10.394               |               |                   |                        |                  |                      |                      | 51134         | 0.28   | 12275       | bb       |        |
| 2 |      | 13.713               |               |                   |                        |                  |                      |                      | 22653         | 0.12   | 6132        | bb       |        |
| 3 |      | 14.288               |               |                   |                        |                  |                      |                      | 18249683      | 99.60  | 2516306     | bb       |        |

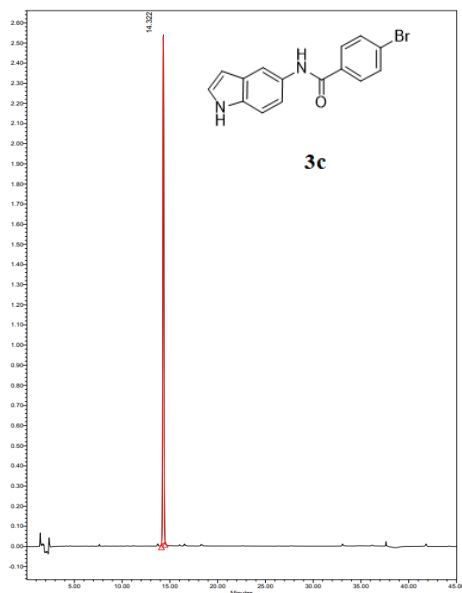

|   | Name | Retention Time (min) | Purity1 Angle | Purity1 Threshold | PDA Match1 Spect. Name | PDA Match1 Angle | PDA Match1 Threshold | PDA Match1 Lib. Name | Area (μV*sec) | % Area | Height (μV) | Int Type | Amount |
|---|------|----------------------|---------------|-------------------|------------------------|------------------|----------------------|----------------------|---------------|--------|-------------|----------|--------|
| 1 |      | 7.622                |               |                   |                        |                  |                      |                      | 26515         | 0.14   | 7036        | bb       |        |
| 2 |      | 13.735               |               |                   |                        |                  |                      |                      | 14448         | 0.08   | 3609        | bb       |        |
| 3 |      | 14.322               |               |                   |                        |                  |                      |                      | 18816968      | 99.78  | 2501866     | bb       |        |

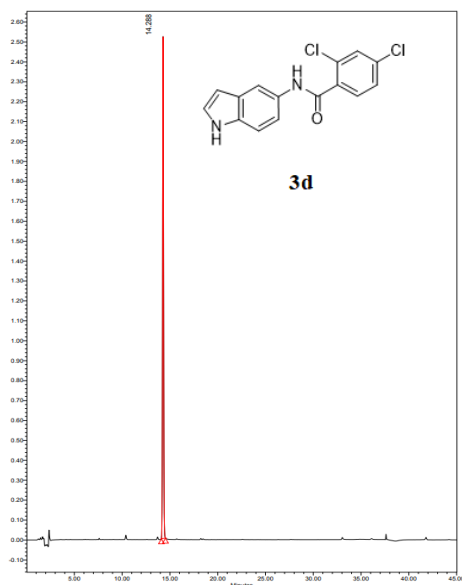

|   | Name | Retention Time (min) | Purity1 Angle | Purity1 Threshold | PDA Match1 Spect. Name | PDA Match1 Angle | PDA Match1 Threshold | PDA Match1 Lib. Name | Area (μV*sec) | % Area | Height (μV) | Int Type | Amount |
|---|------|----------------------|---------------|-------------------|------------------------|------------------|----------------------|----------------------|---------------|--------|-------------|----------|--------|
| 1 |      | 9.583                |               |                   |                        |                  |                      |                      | 142467        | 0.92   | 23767       | bb       |        |
| 2 |      | 14.529               |               |                   |                        |                  |                      |                      | 15290432      | 99.08  | 1694714     | bb       |        |

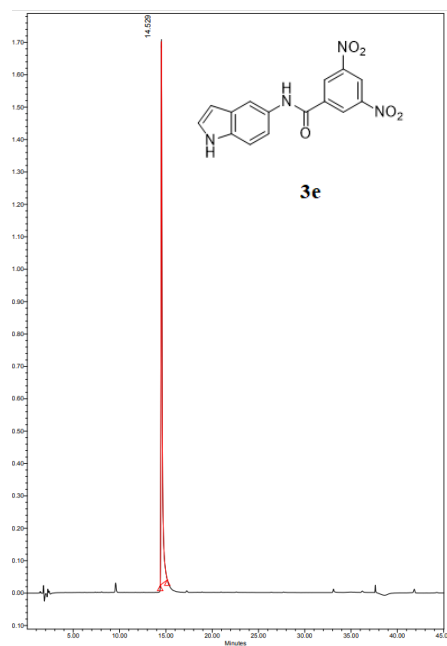

|   | Name | Retention Time (min) | Purity1 Angle | Purity1 Threshold | PDA Match1 Spect. Name | PDA Match1 Angle | PDA Match1 Threshold | PDA Match1 Lib. Name | Area (μV*sec) | % Area | Height (μV) | Int Type | Amount |
|---|------|----------------------|---------------|-------------------|------------------------|------------------|----------------------|----------------------|---------------|--------|-------------|----------|--------|
| 1 |      | 7.391                |               |                   |                        |                  |                      |                      | 117104        | 0.43   | 21760       | bb       |        |
| 2 |      | 12.240               |               |                   |                        |                  |                      |                      | 26980267      | 99.57  | 2433709     | bb       |        |

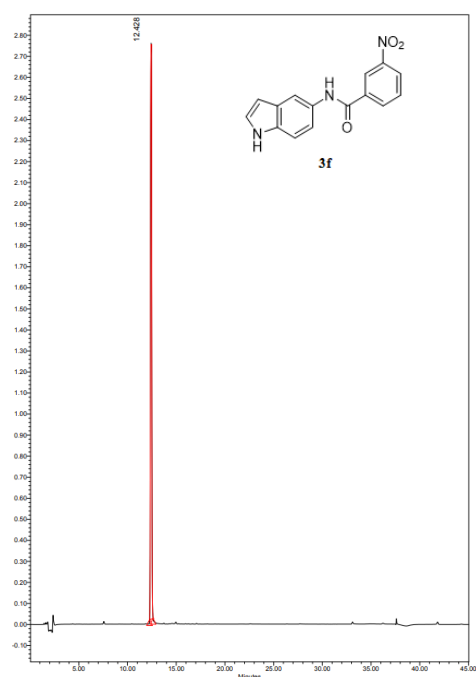

|   | Name | Retention Time (min) | Purity1 Angle | Purity1 Threshold | PDA Match1 Spect. Name | PDA Match1 Angle | PDA Match1 Threshold | PDA Match1 Lib. Name | Area (μV*sec) | % Area | Height (μV) | Int Type | Amount |
|---|------|----------------------|---------------|-------------------|------------------------|------------------|----------------------|----------------------|---------------|--------|-------------|----------|--------|
| 1 |      | 7.988                |               |                   |                        |                  |                      |                      | 9603          | 0.04   | 2618        | bb       |        |
| 2 |      | 12.492               |               |                   |                        |                  |                      |                      | 22455206      | 99.96  | 2734281     | bb       |        |

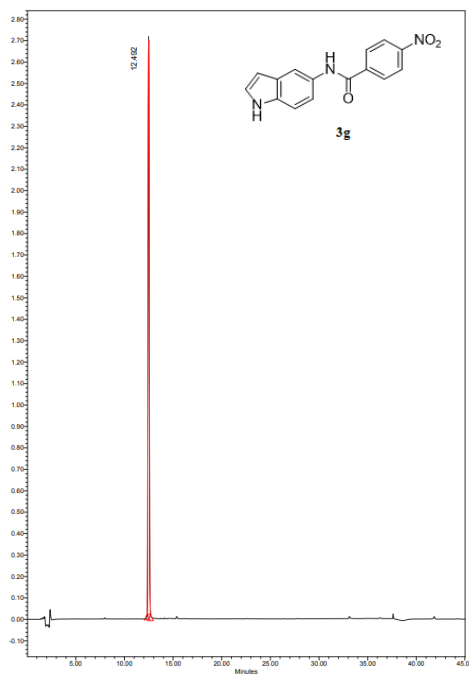

|   | Name | Retention Time (min) | Purity1 Angle | Purity1 Threshold | PDA Match1 Spect. Name | PDA Match1 Angle | PDA Match1 Threshold | PDA Match1 Lib. Name | Area (μV*sec) | % Area | Height (μV) | Int Type | Amount |
|---|------|----------------------|---------------|-------------------|------------------------|------------------|----------------------|----------------------|---------------|--------|-------------|----------|--------|
| 1 |      | 10.743               |               |                   |                        |                  |                      |                      | 28109667      | 100.00 | 2491791     | bb       |        |

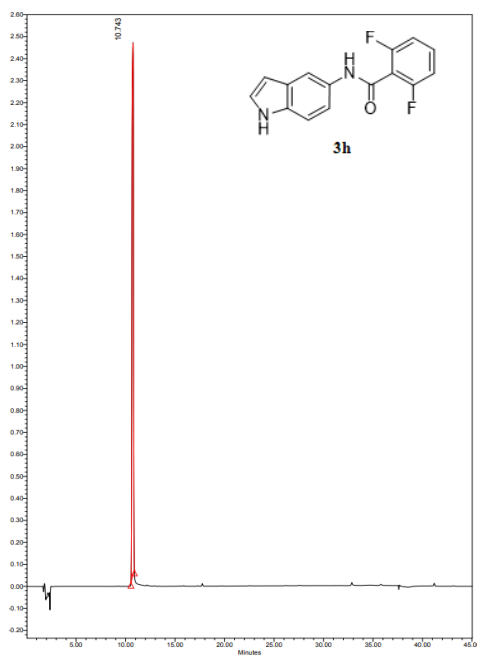

|   | Name | Retention Time (min) | Purity1 Angle | Purity1 Threshold | PDA Match1 Spect. Name | PDA Match1 Angle | PDA Match1 Threshold | PDA Match1 Lib. Name | Area (μV*sec) | % Area | Height (μV) | Int Type | Amount |
|---|------|----------------------|---------------|-------------------|------------------------|------------------|----------------------|----------------------|---------------|--------|-------------|----------|--------|
| 1 |      | 11.445               |               |                   |                        |                  |                      |                      | 4063          | 0.02   | 848         | bb       |        |
| 2 |      | 11.831               |               |                   |                        |                  |                      |                      | 18559470      | 99.94  | 2423051     | bb       |        |
| 3 |      | 14.755               |               |                   |                        |                  |                      |                      | 7772          | 0.04   | 2766        | bb       |        |

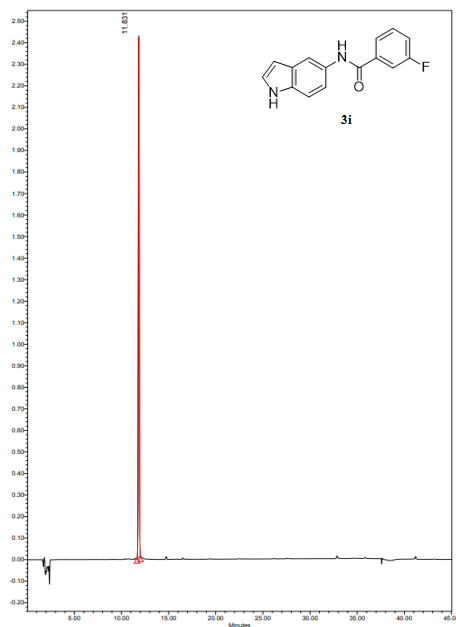

|   | Name | Retention Time (min) | Purity1 Angle | Purity1 Threshold | PDA Match1 Spect. Name | PDA Match1 Angle | PDA Match1 Threshold | PDA Match1 Lib. Name | Area (μV*sec) | % Area | Height (μV) | Int Type | Amount |
|---|------|----------------------|---------------|-------------------|------------------------|------------------|----------------------|----------------------|---------------|--------|-------------|----------|--------|
| 1 |      | 10.993               |               |                   |                        |                  |                      |                      | 4330          | 0.02   | 992         | bb       |        |
| 2 |      | 11.486               |               |                   |                        |                  |                      |                      | 23117939      | 99.27  | 2536209     | bb       |        |
| 3 |      | 12.155               |               |                   |                        |                  |                      |                      | 105518        | 0.45   | 8055        | bb       |        |
| 4 |      | 14.499               |               |                   |                        |                  |                      |                      | 60075         | 0.26   | 11099       | bb       |        |

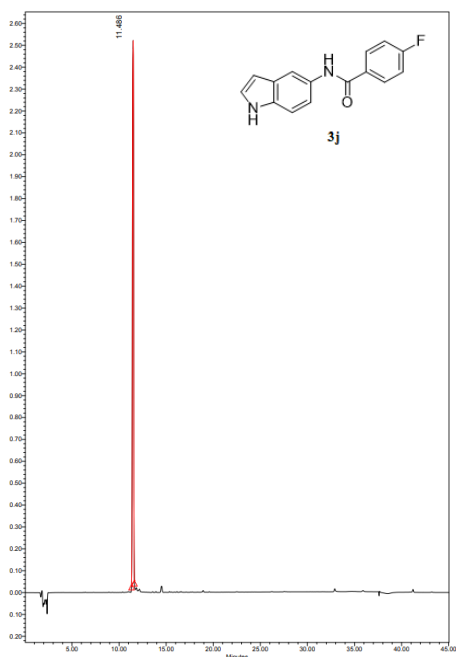

| Name | Retention Time (min) | Purity1 Angle | Purity1 Threshold | PDA Match1 Spect. Name | PDA Match1 Angle | PDA Match1 Threshold | PDA Match1 Lib. Name | Area (μV*sec) | % Area | Height (μV) | Int Type | Amount |
|------|----------------------|---------------|-------------------|------------------------|------------------|----------------------|----------------------|---------------|--------|-------------|----------|--------|
| 1    | 11.214               |               |                   |                        |                  |                      |                      | 25516432      | 99.98  | 2505335     | bb       |        |
| 2    | 11.866               |               |                   |                        |                  |                      |                      | 5432          | 0.02   | 1299        | bb       |        |

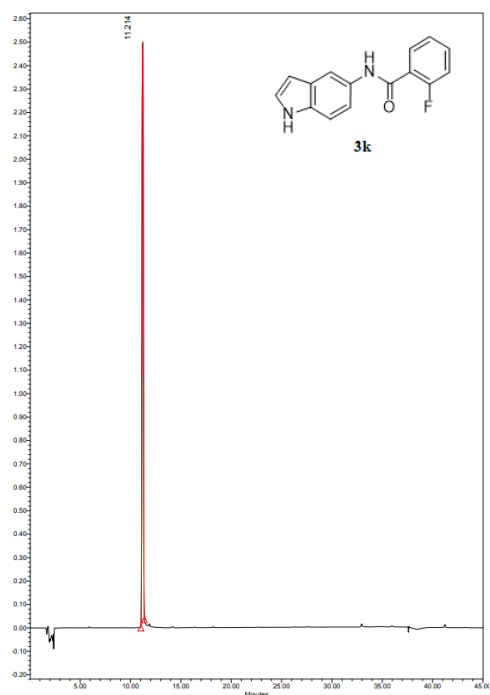

| Name | Retention Time (min) | Purity1 Angle | Purity1 Threshold | PDA Match1 Spect. Name | PDA Match1 Angle | PDA Match1 Threshold | PDA Match1 Lib. Name | Area (μV*sec) | % Area | Height (μV) | Int Type | Amount |
|------|----------------------|---------------|-------------------|------------------------|------------------|----------------------|----------------------|---------------|--------|-------------|----------|--------|
| 1    | 11.195               |               |                   |                        |                  |                      |                      | 247702        | 1.09   | 48572       | bb       |        |
| 2    | 13.051               |               |                   |                        |                  |                      |                      | 25392         | 0.11   | 5154        | bb       |        |
| 3    | 13.350               |               |                   |                        |                  |                      |                      | 22510345      | 98.80  | 2477503     | bb       |        |

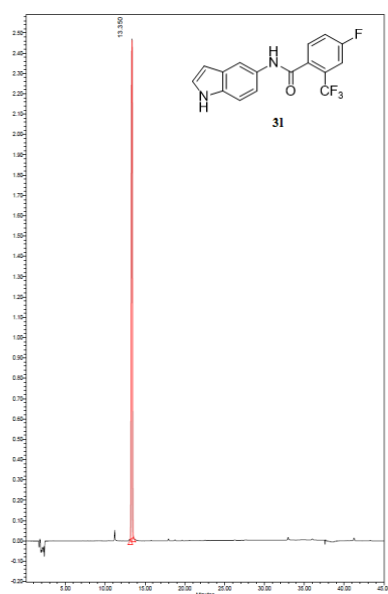



|   | Name | Retention Time (min) | Purity1 Angle | Purity1 Threshold | PDA Match1 Spect. Name | PDA Match1 Angle | PDA Match1 Threshold | PDA Match1 Lib. Name | Area (μV*sec) | % Area | Height (μV) | Int Type | Amount |
|---|------|----------------------|---------------|-------------------|------------------------|------------------|----------------------|----------------------|---------------|--------|-------------|----------|--------|
| 1 |      | 5.348                |               |                   |                        |                  |                      |                      | 341917        | 1.19   | 49608       | bb       |        |
| 2 |      | 7.726                |               |                   |                        |                  |                      |                      | 120456        | 0.42   | 28160       | bb       |        |
| 3 |      | 10.964               |               |                   |                        |                  |                      |                      | 27885896      | 97.06  | 2589526     | bb       |        |
| 4 |      | 12.798               |               |                   |                        |                  |                      |                      | 302127        | 1.05   | 19118       | bb       |        |
| 5 |      | 15.733               |               |                   |                        |                  |                      |                      | 81303         | 0.28   | 16951       | bb       |        |

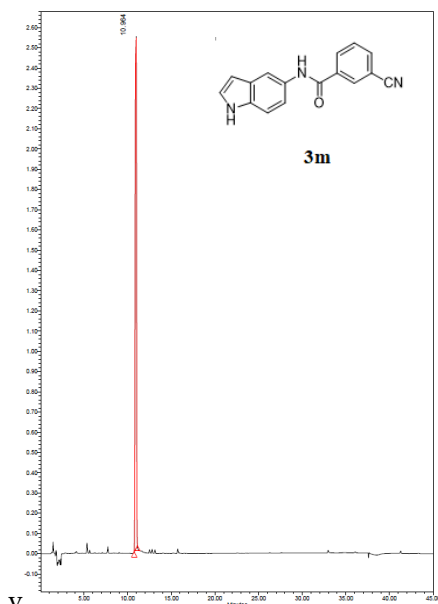

|   | Name | Retention Time (min) | Purity1 Angle | Purity1 Threshold | PDA Match1 Spect. Name | PDA Match1 Angle | PDA Match1 Threshold | PDA Match1 Lib. Name | Area (μV*sec) | % Area | Height (μV) | Int Type | Amount |
|---|------|----------------------|---------------|-------------------|------------------------|------------------|----------------------|----------------------|---------------|--------|-------------|----------|--------|
| 1 |      | 11.230               |               |                   |                        |                  |                      |                      | 64483         | 0.23   | 15474       | bb       |        |
| 2 |      | 13.164               |               |                   |                        |                  |                      |                      | 67342         | 0.24   | 9602        | bb       |        |
| 3 |      | 13.875               |               |                   |                        |                  |                      |                      | 27736031      | 98.79  | 2555833     | bb       |        |
| 4 |      | 17.374               |               |                   |                        |                  |                      |                      | 207675        | 0.74   | 19992       | bb       |        |

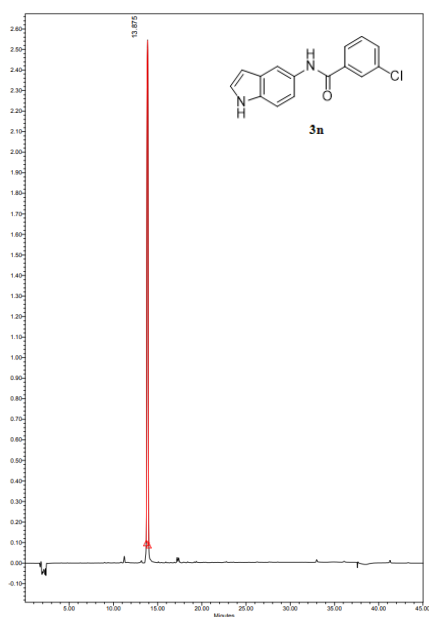

|   | Name | Retention Time (min) | Purity1 Angle | Purity1 Threshold | PDA Match1 Spect. Name | PDA Match1 Angle | PDA Match1 Threshold | PDA Match1 Lib. Name | Area (μV*sec) | % Area | Height (μV) | Int Type | Amount |
|---|------|----------------------|---------------|-------------------|------------------------|------------------|----------------------|----------------------|---------------|--------|-------------|----------|--------|
| 1 |      | 7.374                |               |                   |                        |                  |                      |                      | 131151        | 0.33   | 25900       | bb       |        |
| 2 |      | 11.355               |               |                   |                        |                  |                      |                      | 38566049      | 96.81  | 2617879     | bb       |        |
| 3 |      | 14.045               |               |                   |                        |                  |                      |                      | 1138043       | 2.86   | 86959       | bb       |        |

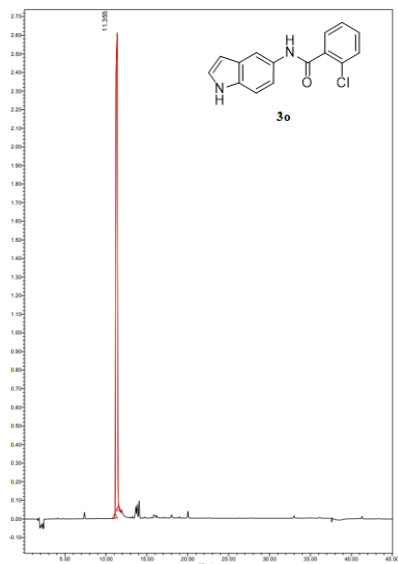

|   | Name | Retention Time (min) | Purity1 Angle | Purity1 Threshold | PDA Match1 Spect. Name | PDA Match1 Angle | PDA Match1 Threshold | PDA Match1 Lib. Name | Area (μV*sec) | % Area | Height (μV) | Int Type | Amount |
|---|------|----------------------|---------------|-------------------|------------------------|------------------|----------------------|----------------------|---------------|--------|-------------|----------|--------|
| 1 |      | 9.718                |               |                   |                        |                  |                      |                      | 135831        | 0.44   | 26761       | bb       |        |
| 2 |      | 13.361               |               |                   |                        |                  |                      |                      | 30485         | 0.10   | 5746        | bb       |        |
| 3 |      | 13.748               |               |                   |                        |                  |                      |                      | 30382869      | 97.74  | 2605835     | bb       |        |
| 4 |      | 14.257               |               |                   |                        |                  |                      |                      | 55625         | 0.18   | 11829       | bb       |        |
| 5 |      | 15.267               |               |                   |                        |                  |                      |                      | 93708         | 0.30   | 15387       | bb       |        |
| 6 |      | 16.472               |               |                   |                        |                  |                      |                      | 43692         | 0.14   | 10354       | bb       |        |
| 7 |      | 17.614               |               |                   |                        |                  |                      |                      | 343782        | 1.11   | 30899       | bb       |        |

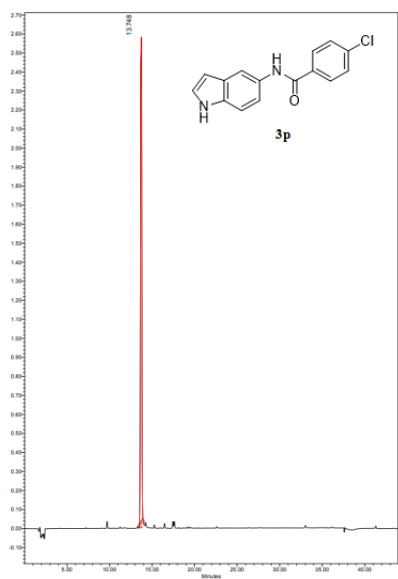

|   | Name | Retention Time (min) | Purity1 Angle | Purity1 Threshold | PDA Match1 Spect. Name | PDA Match1 Angle | PDA Match1 Threshold | PDA Match1 Lib. Name | Area (μV*sec) | % Area | Height (μV) | Int Type | Amount |
|---|------|----------------------|---------------|-------------------|------------------------|------------------|----------------------|----------------------|---------------|--------|-------------|----------|--------|
| 1 |      | 17.291               |               |                   |                        |                  |                      |                      | 23093841      | 100.00 | 2401255     | bb       |        |

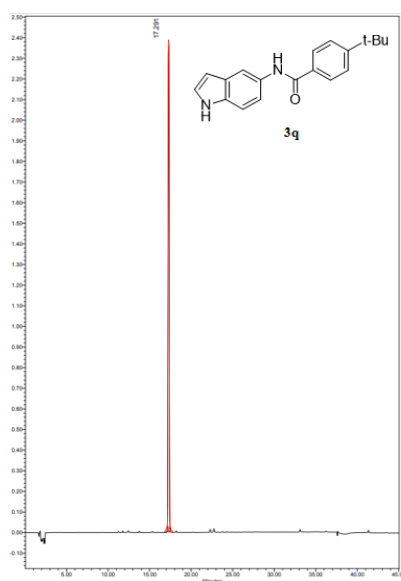

|   | Name | Retention Time (min) | Purity1 Angle | Purity1 Threshold | PDA Match1 Spect. Name | PDA Match1 Angle | PDA Match1 Threshold | PDA Match1 Lib. Name | Area (μV*sec) | % Area | Height (μV) | Int Type | Amount |
|---|------|----------------------|---------------|-------------------|------------------------|------------------|----------------------|----------------------|---------------|--------|-------------|----------|--------|
| 1 |      | 14.501               |               |                   |                        |                  |                      |                      | 26882669      | 99.80  | 2440766     | bb       |        |
| 2 |      | 20.866               |               |                   |                        |                  |                      |                      | 53116         | 0.20   | 11742       | bb       |        |

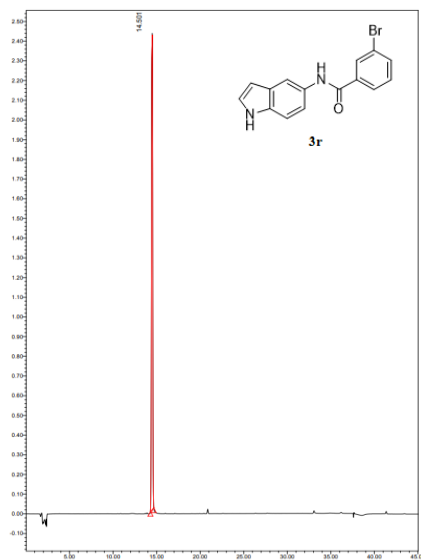

|   | Name | Retention Time (min) | Purity1 Angle | Purity1 Threshold | PDA Match1 Spect. Name | PDA Match1 Angle | PDA Match1 Threshold | PDA Match1 Lib. Name | Area (μV*sec) | % Area | Height (μV) | Int Type | Amount |
|---|------|----------------------|---------------|-------------------|------------------------|------------------|----------------------|----------------------|---------------|--------|-------------|----------|--------|
| 1 |      | 15.821               |               |                   |                        |                  |                      |                      | 7902091       | 100.00 | 1219456     | bb       |        |

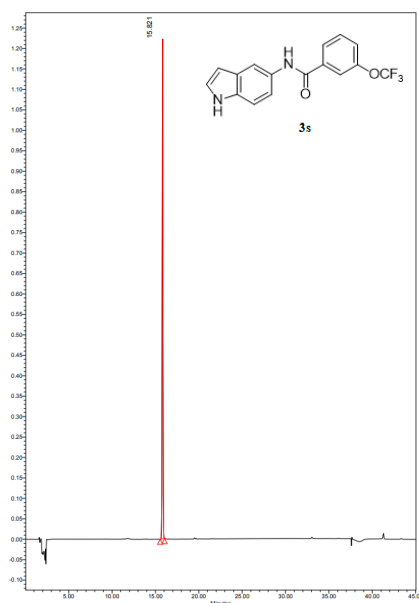

|   | Name | Retention Time (min) | Purity1 Angle | Purity1 Threshold | PDA Match1 Spect. Name | PDA Match1 Angle | PDA Match1 Threshold | PDA Match1 Lib. Name | Area (μV*sec) | % Area | Height (μV) | Int Type | Amount |
|---|------|----------------------|---------------|-------------------|------------------------|------------------|----------------------|----------------------|---------------|--------|-------------|----------|--------|
| 1 |      | 13.518               |               |                   |                        |                  |                      |                      | 30816         | 0.14   | 7913        | bb       |        |
| 2 |      | 15.710               |               |                   |                        |                  |                      |                      | 21523563      | 99.65  | 2411299     | bb       |        |
| 3 |      | 19.739               |               |                   |                        |                  |                      |                      | 44224         | 0.20   | 5786        | bb       |        |

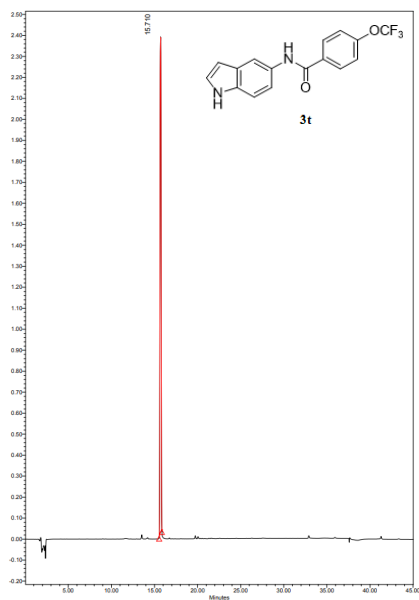

|   | Name | Retention Time (min) | Purity1 Angle | Purity1 Threshold | PDA Match1 Spect. Name | PDA Match1 Angle | PDA Match1 Threshold | PDA Match1 Lib. Name | Area (μV*sec) | % Area | Height (μV) | Int Type | Amount |
|---|------|----------------------|---------------|-------------------|------------------------|------------------|----------------------|----------------------|---------------|--------|-------------|----------|--------|
| 1 |      | 15.174               |               |                   |                        |                  |                      |                      | 13095325      | 99.74  | 1931903     | bb       |        |
| 2 |      | 17.541               |               |                   |                        |                  |                      |                      | 33569         | 0.26   | 7442        | bb       |        |

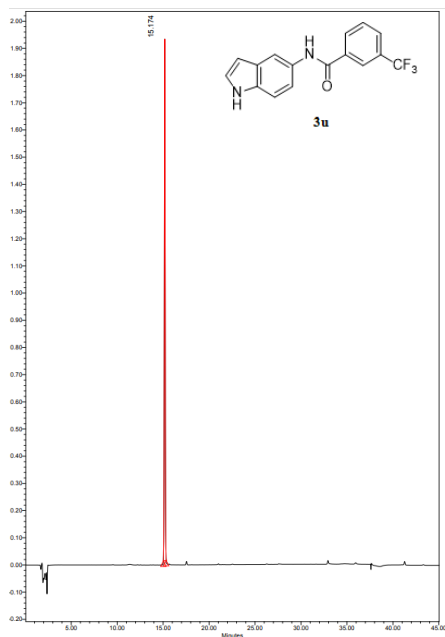

|   | Name | Retention Time (min) | Purity1 Angle | Purity1 Threshold | PDA Match1 Spect. Name | PDA Match1 Angle | PDA Match1 Threshold | PDA Match1 Lib. Name | Area (μV*sec) | % Area | Height (μV) | Int Type | Amount | Units |
|---|------|----------------------|---------------|-------------------|------------------------|------------------|----------------------|----------------------|---------------|--------|-------------|----------|--------|-------|
| 1 |      | 15.191               |               |                   |                        |                  |                      |                      | 5061562       | 99.98  | 775599      | bb       |        |       |
| 2 |      | 20.883               |               |                   |                        |                  |                      |                      | 832           | 0.02   | -271        | bb       |        |       |

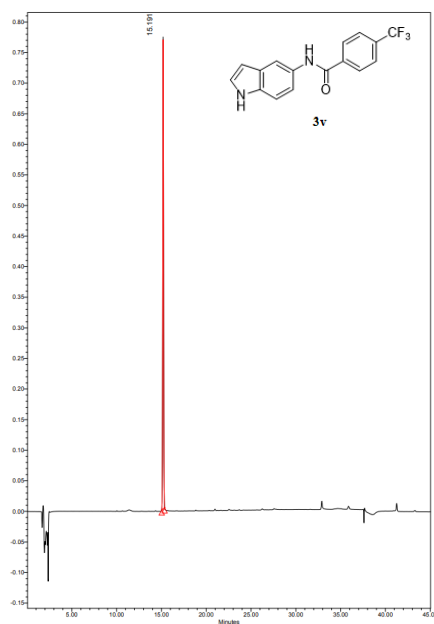

|   | Name | Retention Time (min) | Purity1 Angle | Purity1 Threshold | PDA Match1 Spect. Name | PDA Match1 Angle | PDA Match1 Threshold | PDA Match1 Lib. Name | Area (μV*sec) | % Area | Height (μV) | Int Type | Amount |
|---|------|----------------------|---------------|-------------------|------------------------|------------------|----------------------|----------------------|---------------|--------|-------------|----------|--------|
| 1 |      | 14.209               |               |                   |                        |                  |                      |                      | 4338          | 0.04   | 352         | bb       |        |
| 2 |      | 17.439               |               |                   |                        |                  |                      |                      | 9987329       | 99.96  | 1442664     | bb       |        |

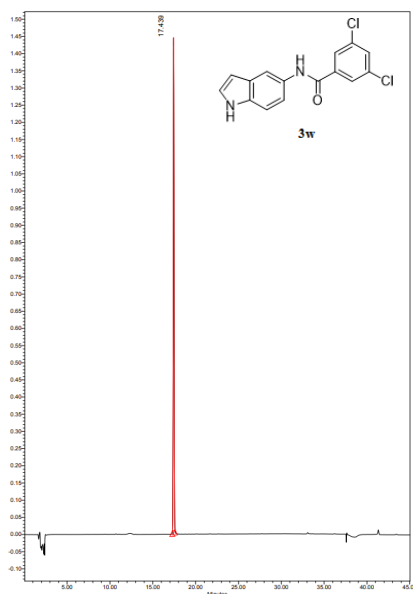

|   | Name | Retention Time (min) | Purity1 Angle | Purity1 Threshold | PDA Match1 Spect. Name | PDA Match1 Angle | PDA Match1 Threshold | PDA Match1 Lib. Name | Area (μV*sec) | % Area | Height (μV) | Int Type | Amount |
|---|------|----------------------|---------------|-------------------|------------------------|------------------|----------------------|----------------------|---------------|--------|-------------|----------|--------|
| 1 |      | 12.478               |               |                   |                        |                  |                      |                      | 25571048      | 100.00 | 1767966     | bb       |        |

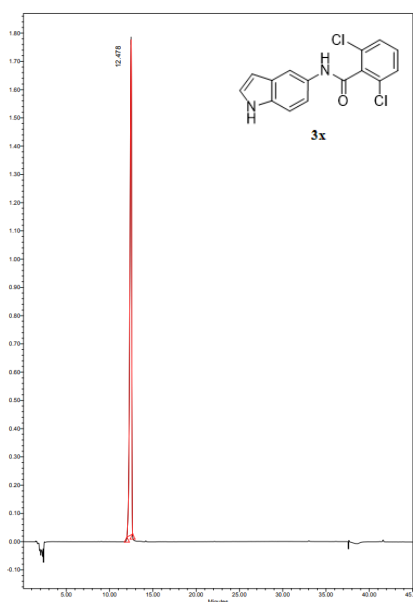

#### 4. HRMS charts

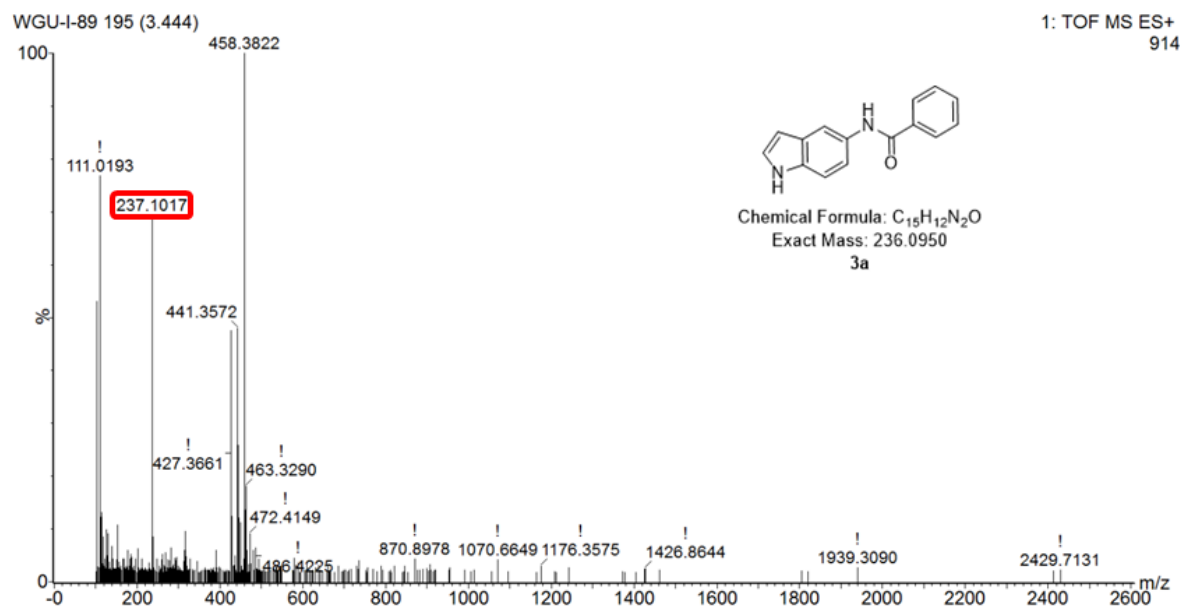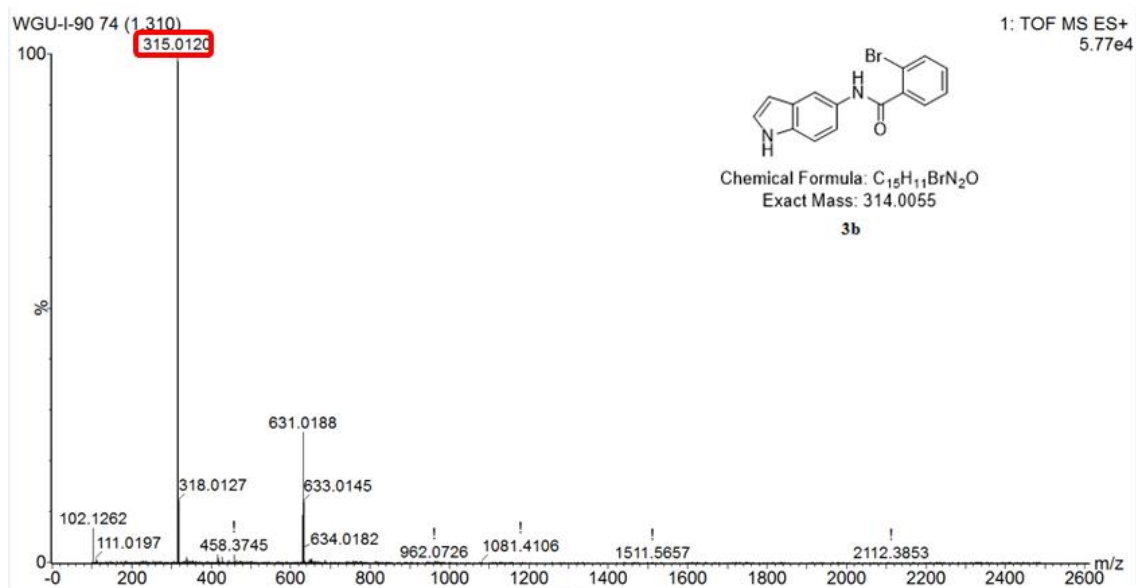

WGU-I-91 76 (1.344)

1: TOF MS ES+  
2.58e4

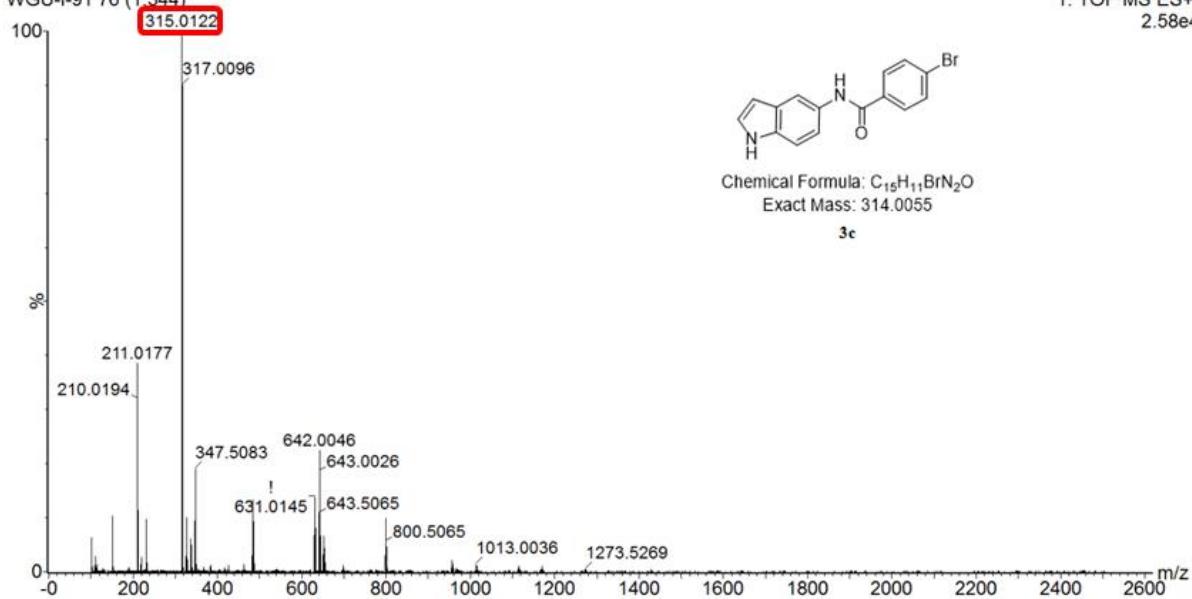

WGU-I-92 92 (1.627)

1: TOF MS ES+  
2.20e4

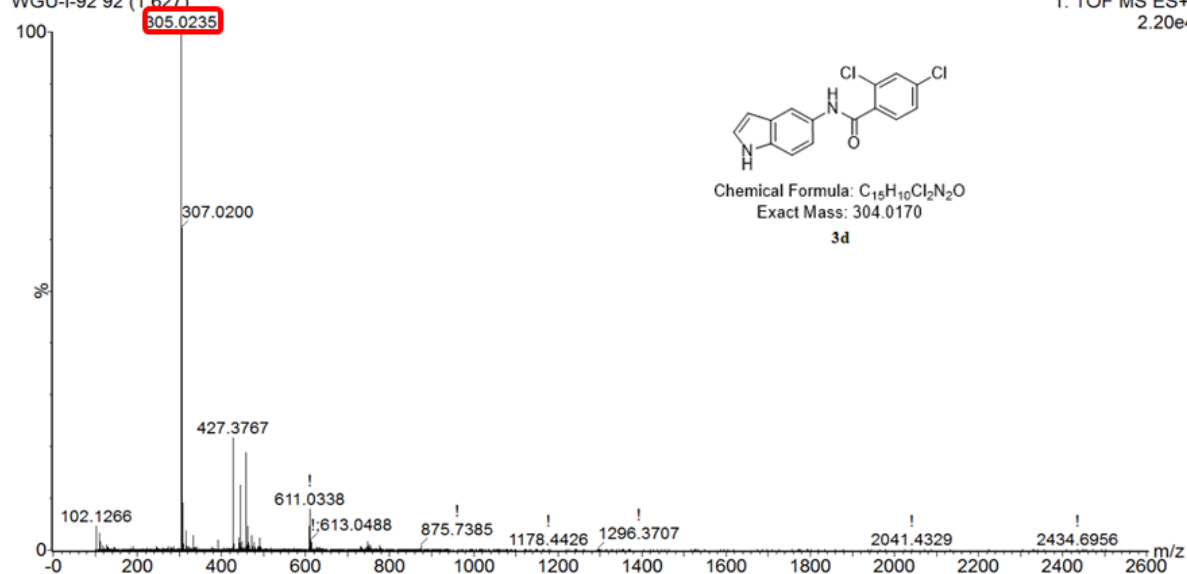



WGU-I-97 71 (1.258)

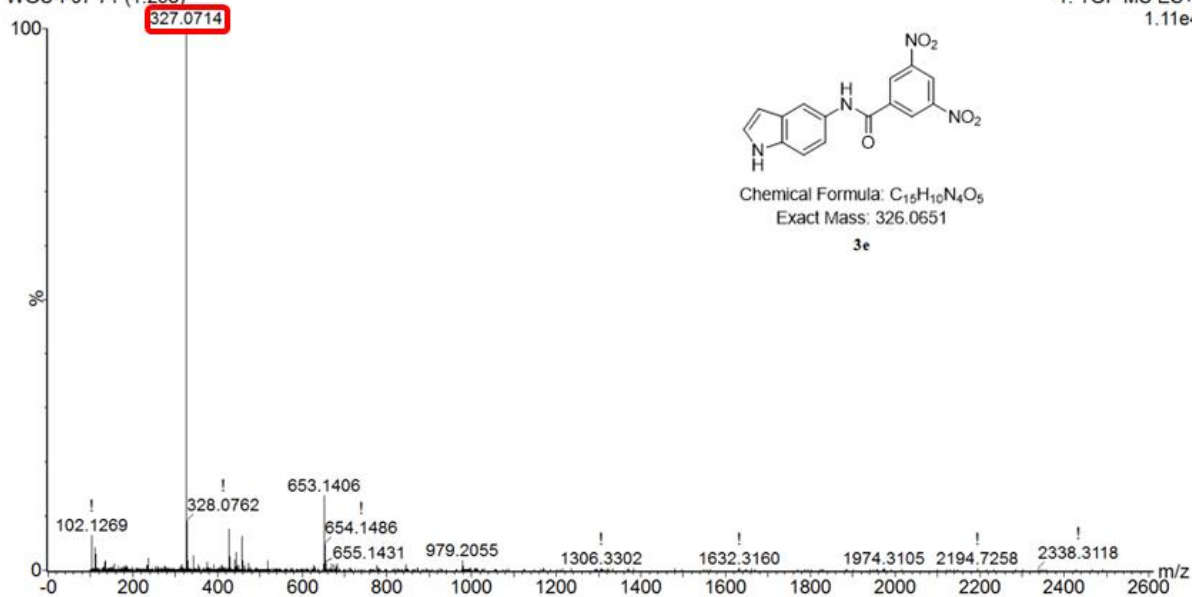

1: TOF MS ES+  
1.11e4

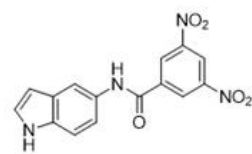

Chemical Formula:  $C_{15}H_{10}N_4O_5$   
Exact Mass: 326.0651  
**3e**

WGU-I-98 80 (1.422)

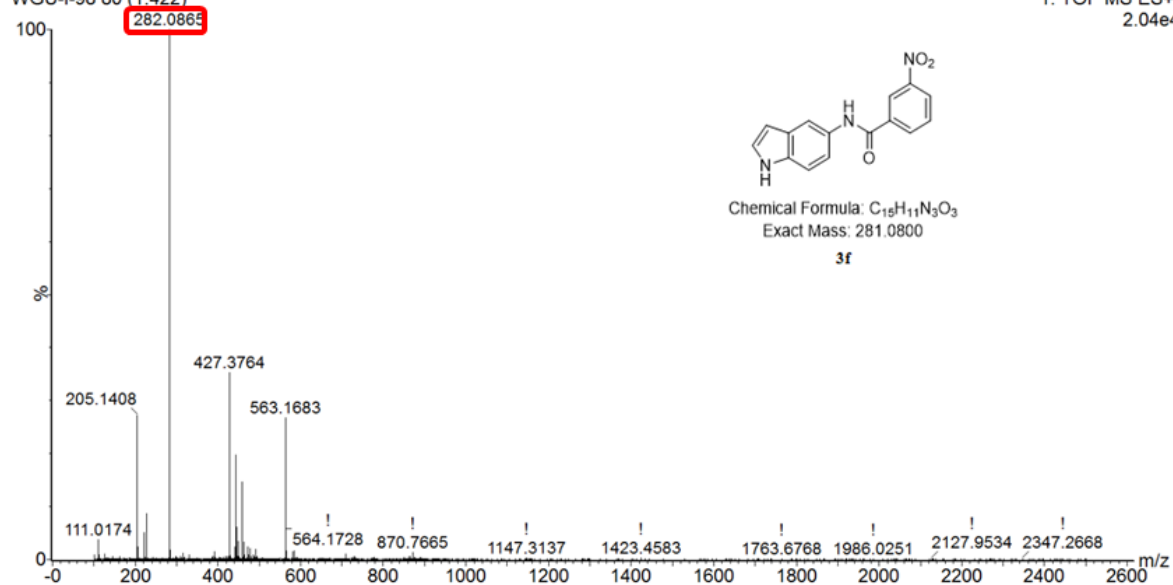

1: TOF MS ES+  
2.04e4

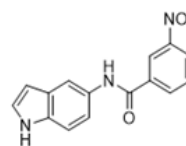

Chemical Formula:  $C_{15}H_{11}N_3O_3$   
Exact Mass: 281.0800  
**3f**

WGU-I-99 82 (1.455)

1: TOF MS ES+  
1.04e4

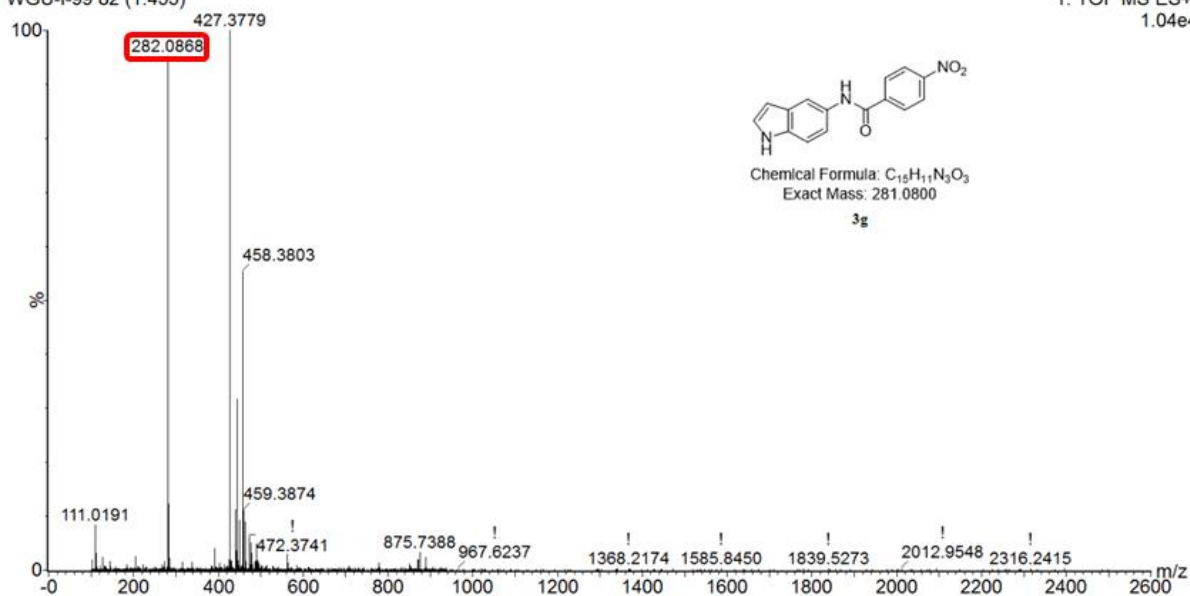

WGU-II-68 133 (2.346)

1: TOF MS ES+  
5.76e4

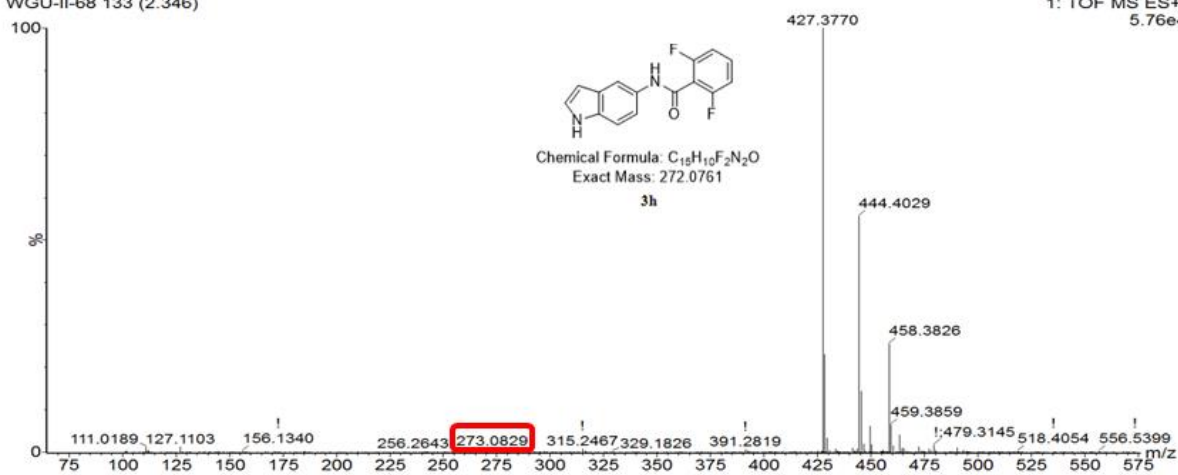

WGU-II-69 121 (2.140)

1: TOF MS ES+  
1.59e4

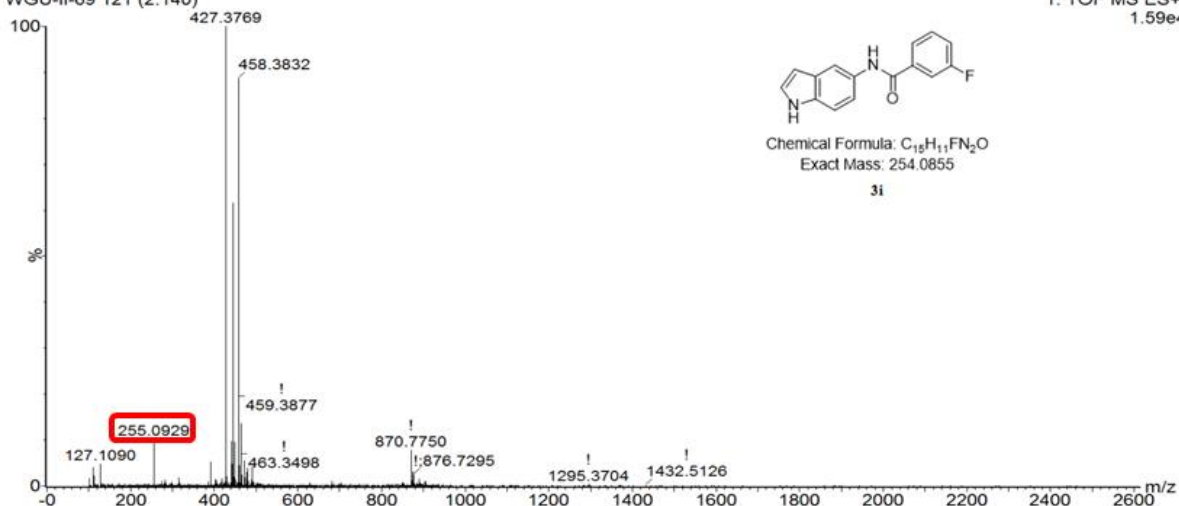

WGU-II-70 148 (2.613)

1: TOF MS ES+  
181

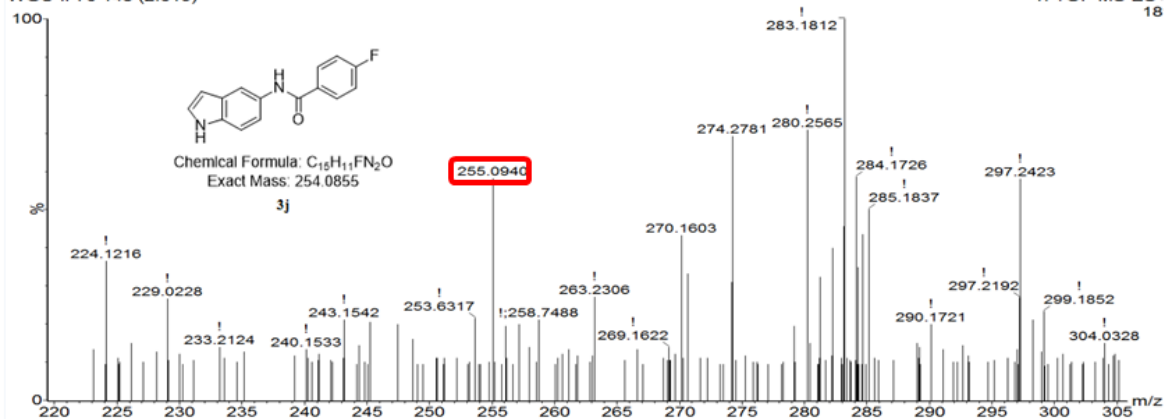

WGU-II-71 156 (2.757)

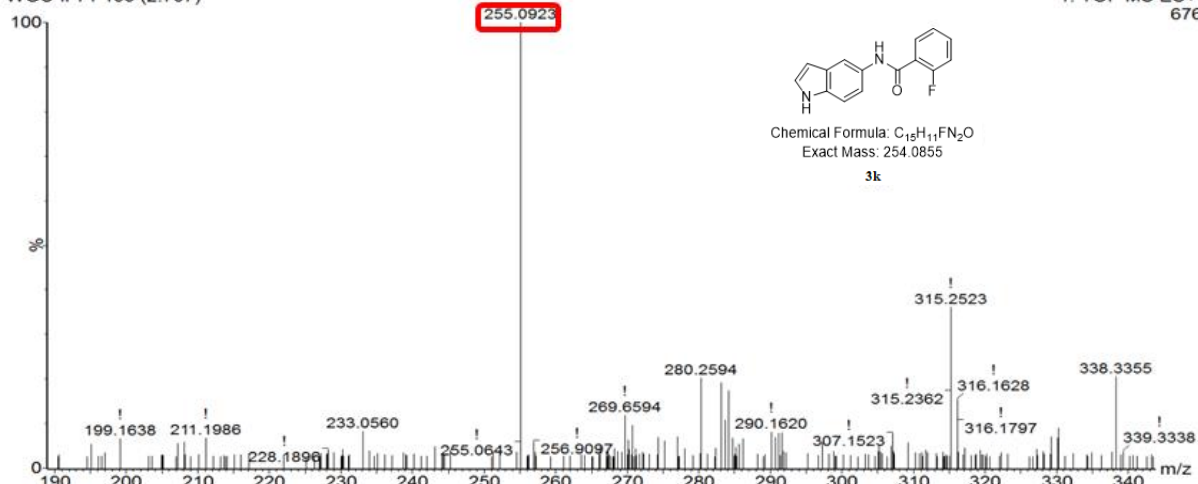

WGU-II-72 80 (1.422)

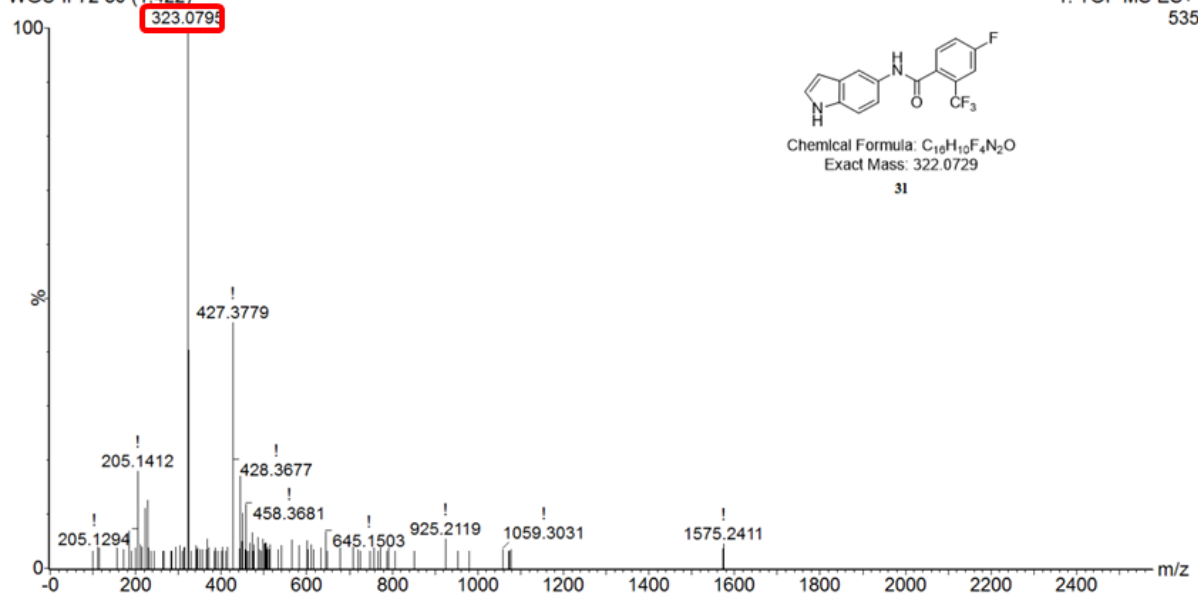

WGU-II-74 137 (2.423)

1: TOF MS ES+  
138

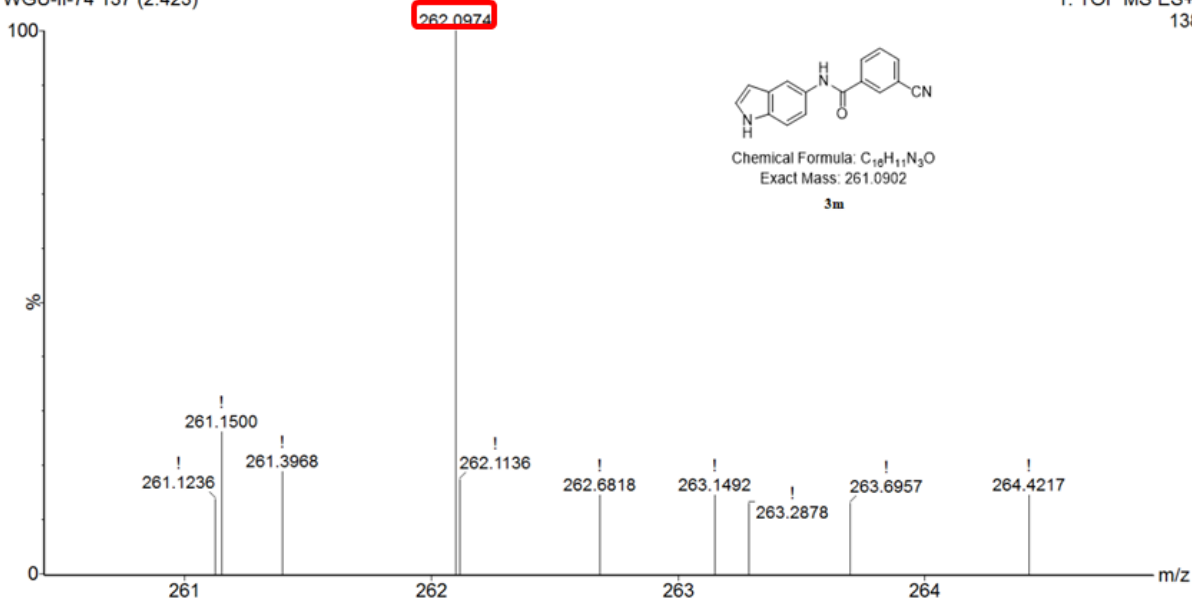

WGU-II-75 83 (1.472)

1: TOF MS ES+  
5.45e4

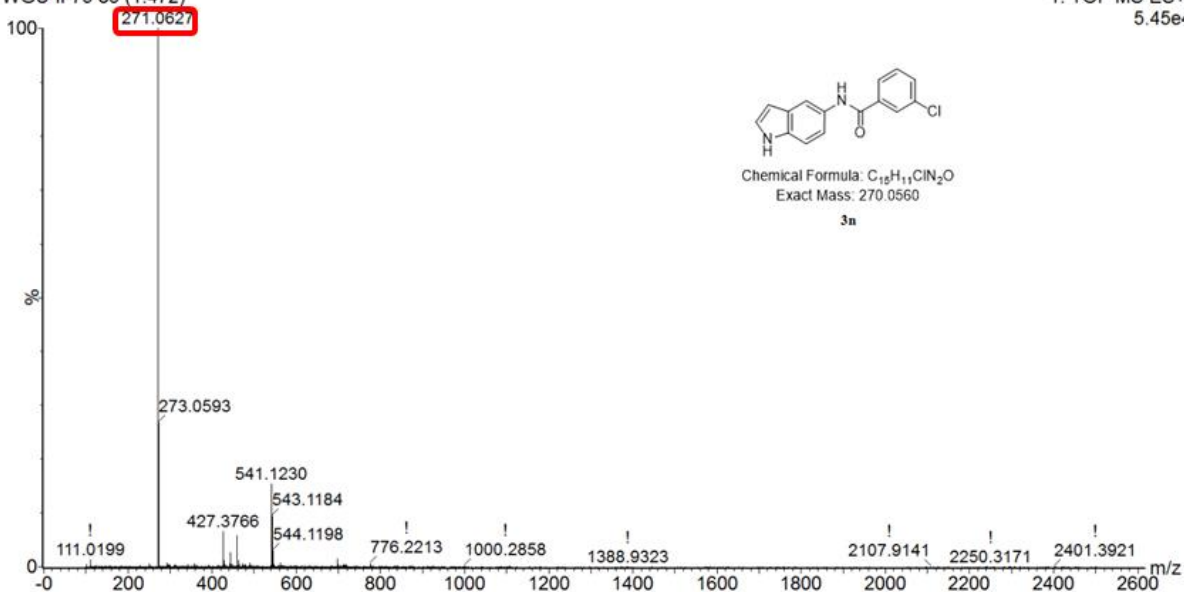

WGU-II-76 74 (1.310)

271.0627

1: TOF MS ES+  
1.38e5

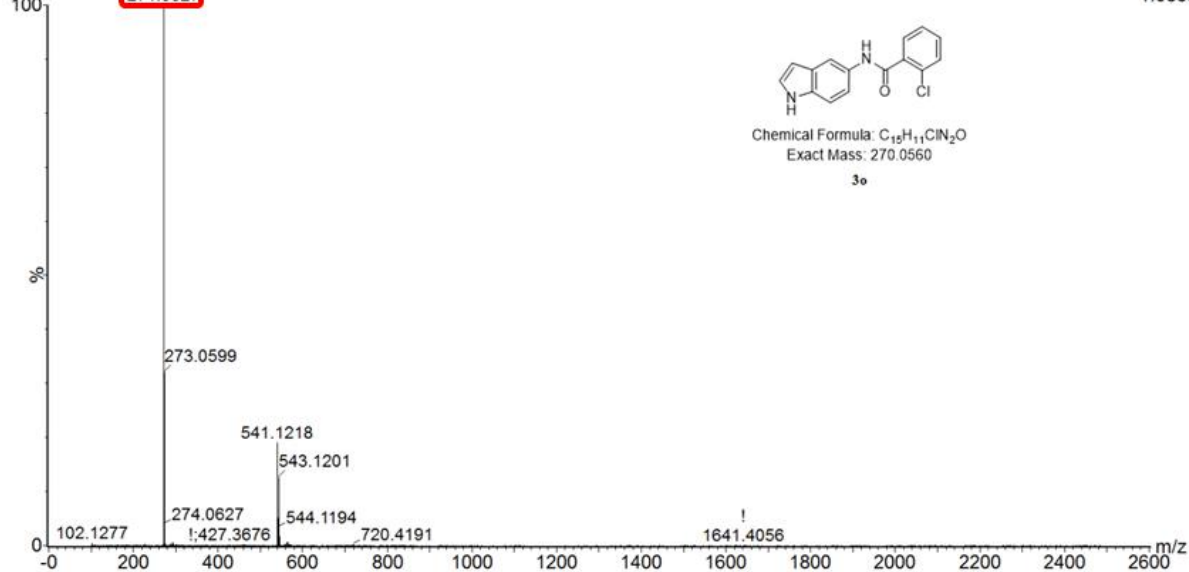

WGU-II-77 85 (1.508)

271.0625

1: TOF MS ES+  
7.34e4

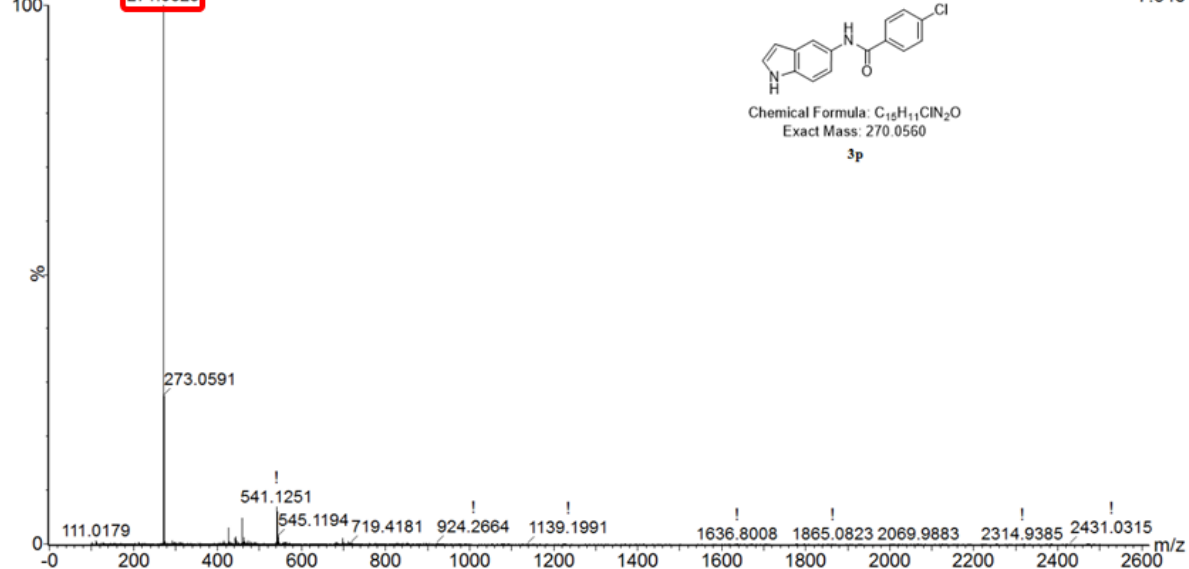

WGU-II-78 116 (2.056)

1: TOF MS ES+  
7.66e4

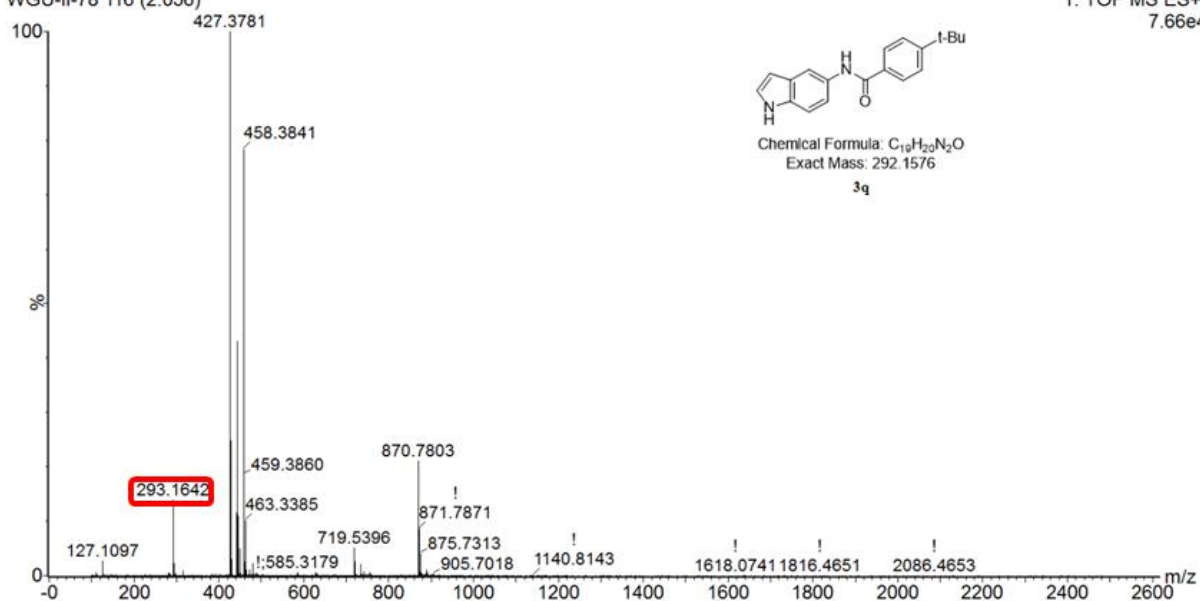

WGU-II-79 75 (1.327)

1: TOF MS ES+  
3.37e4

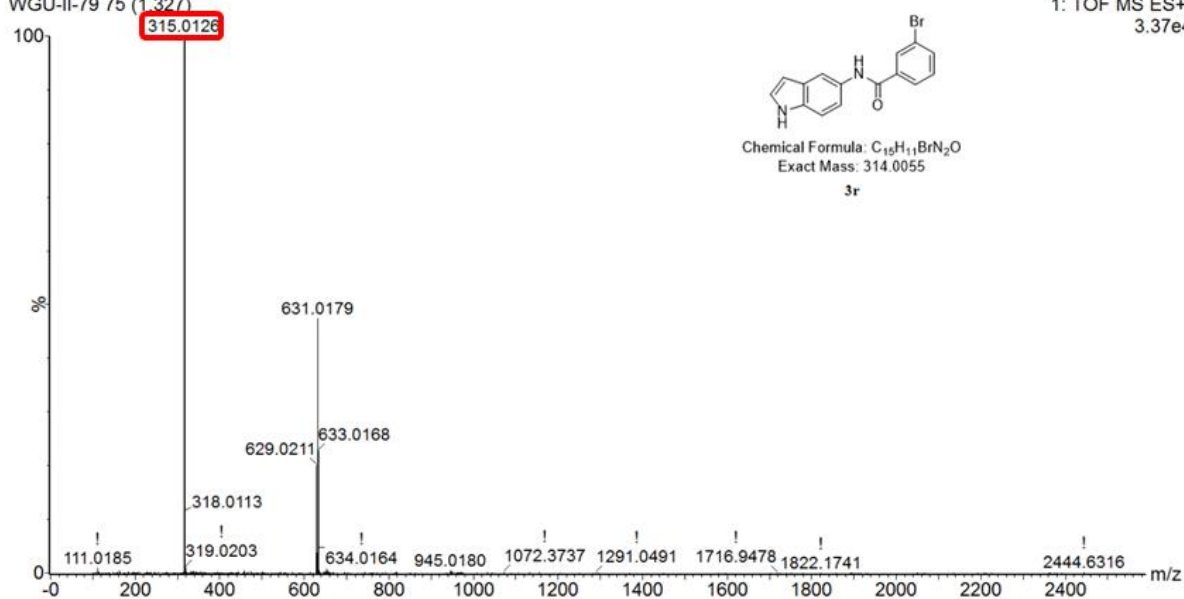

WGU-II-80 80 (1.421)

1: TOF MS ES+  
1.25e5

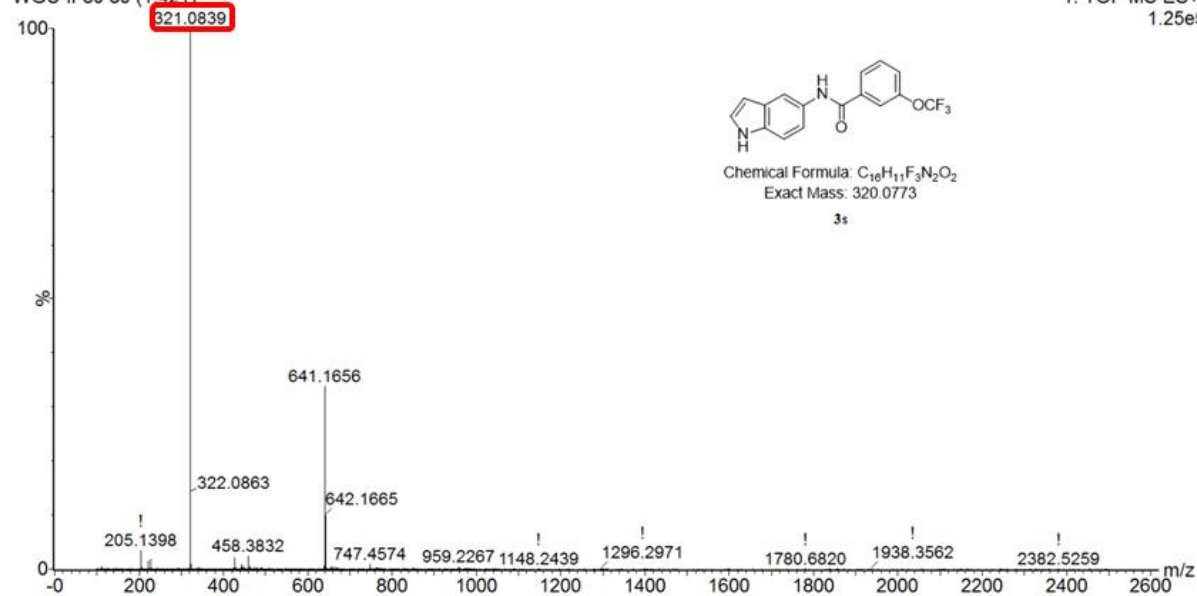

WGU-II-81 74 (1.310)

1: TOF MS ES+  
2.75e5

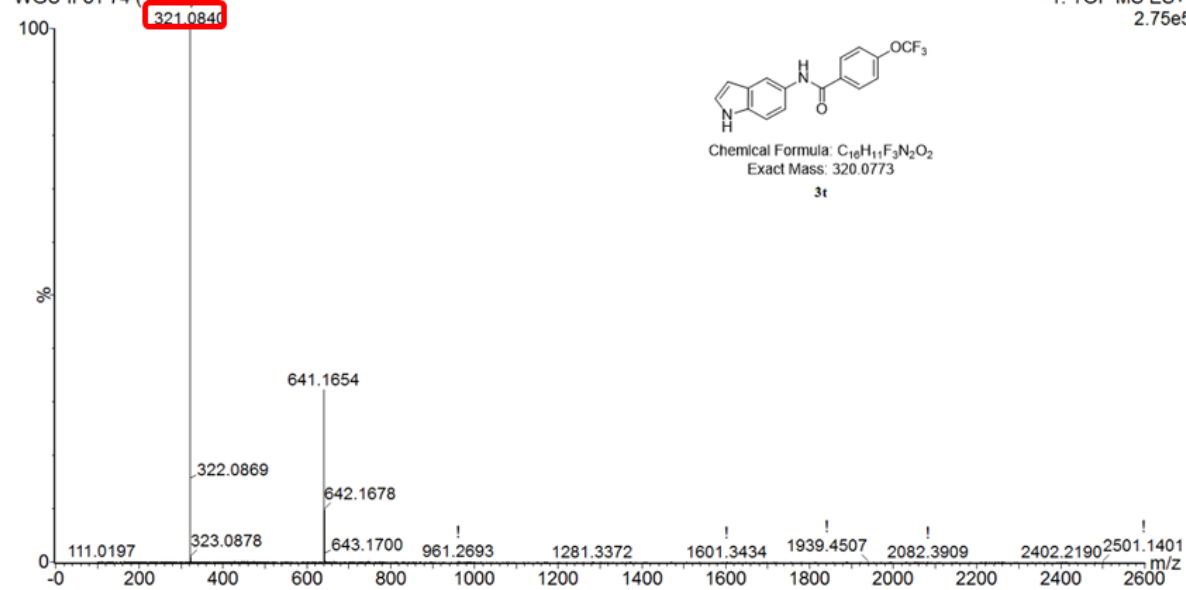



WGU-II-82 74 (1.310)

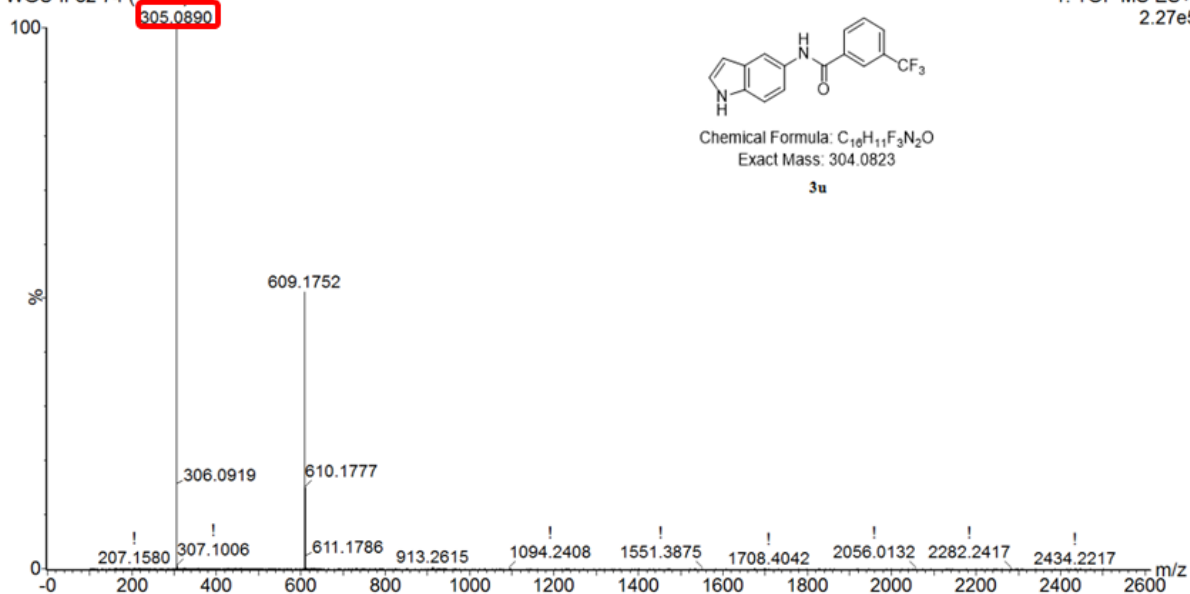

1: TOF MS ES+  
2.27e5

WGU-II-83 74 (1.310)

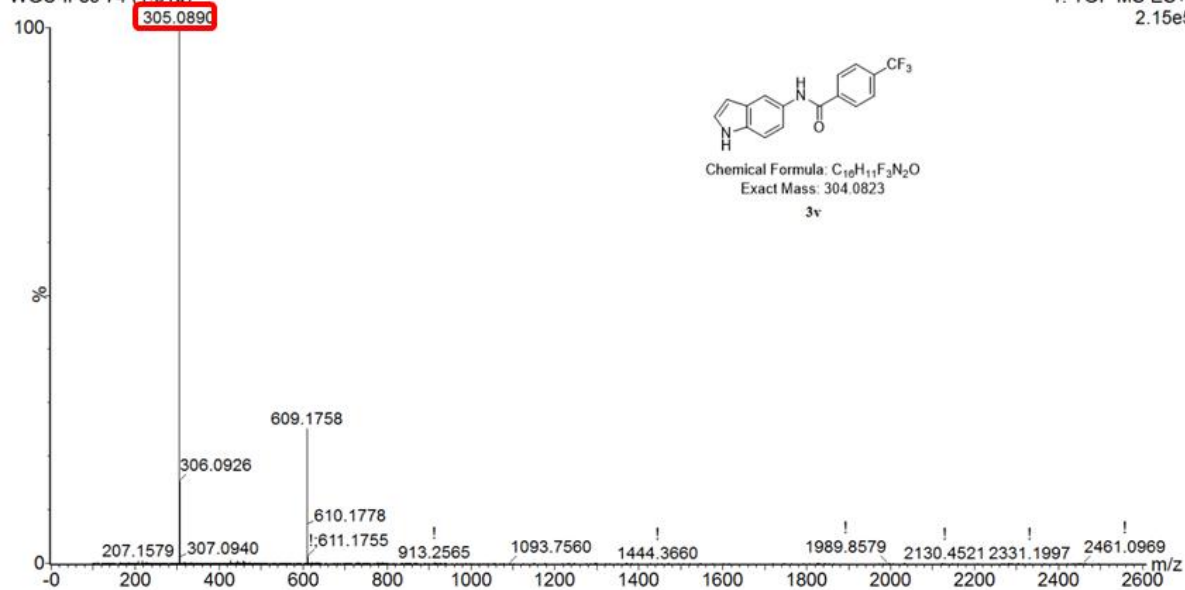

1: TOF MS ES+  
2.15e5

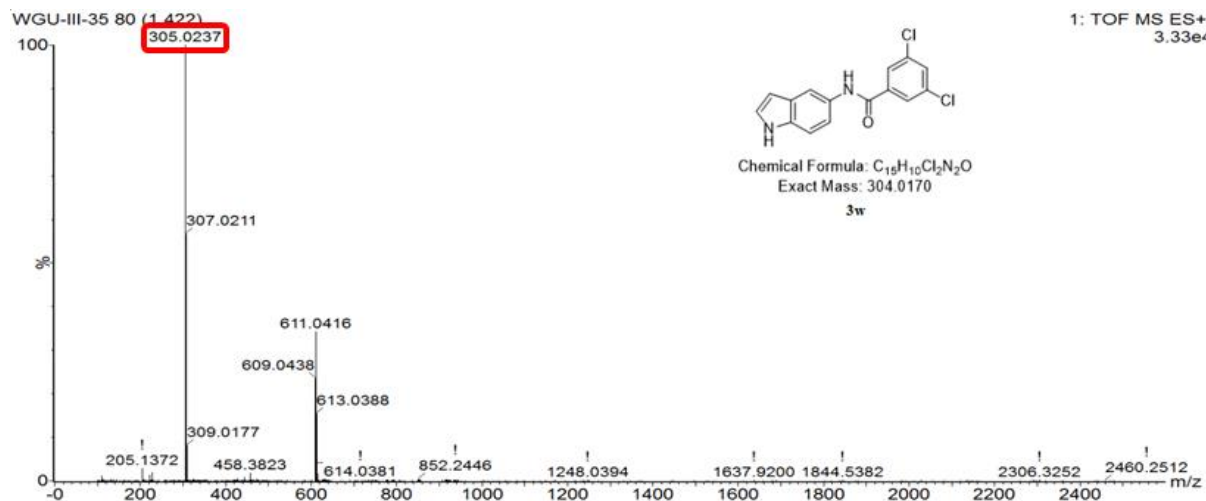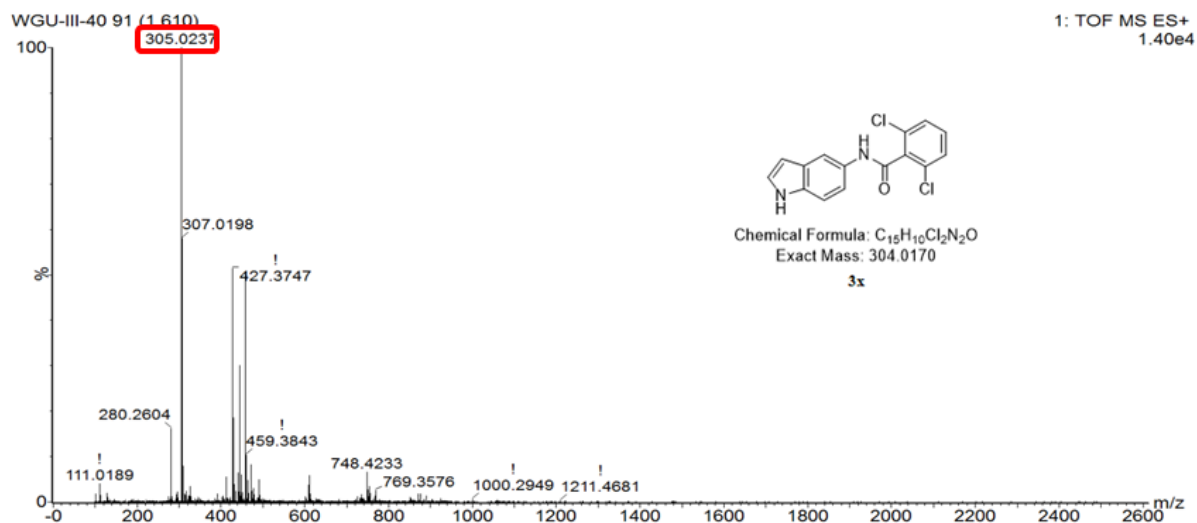

## 5. IR charts

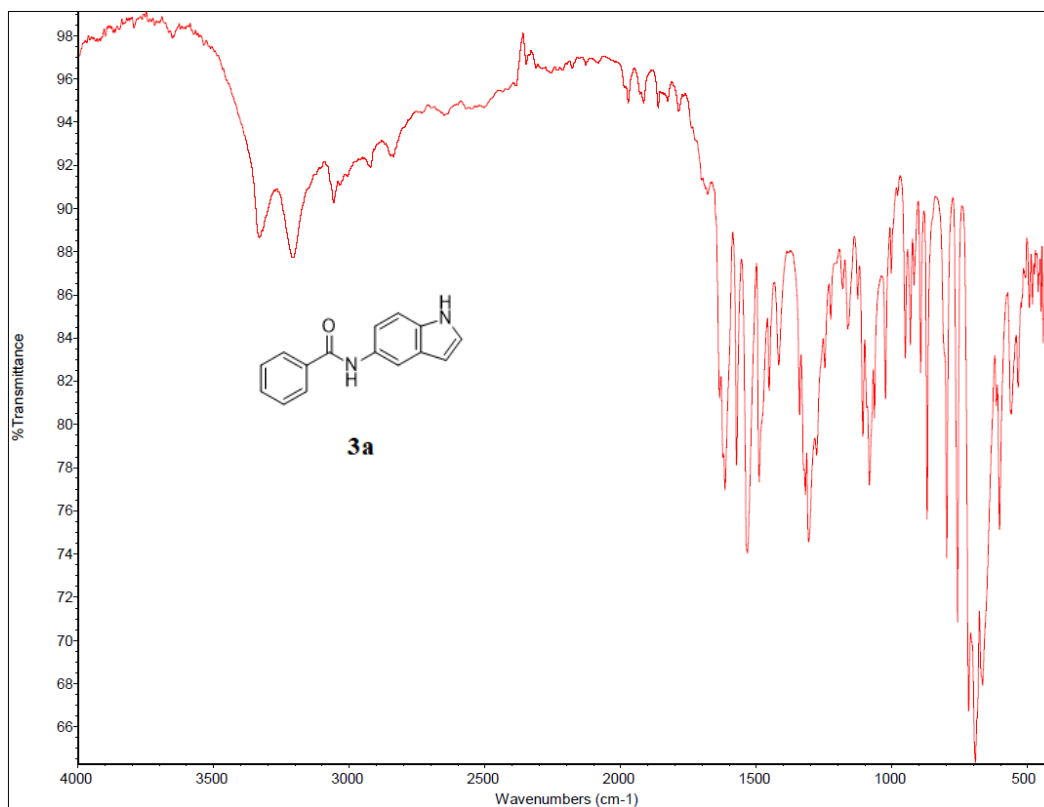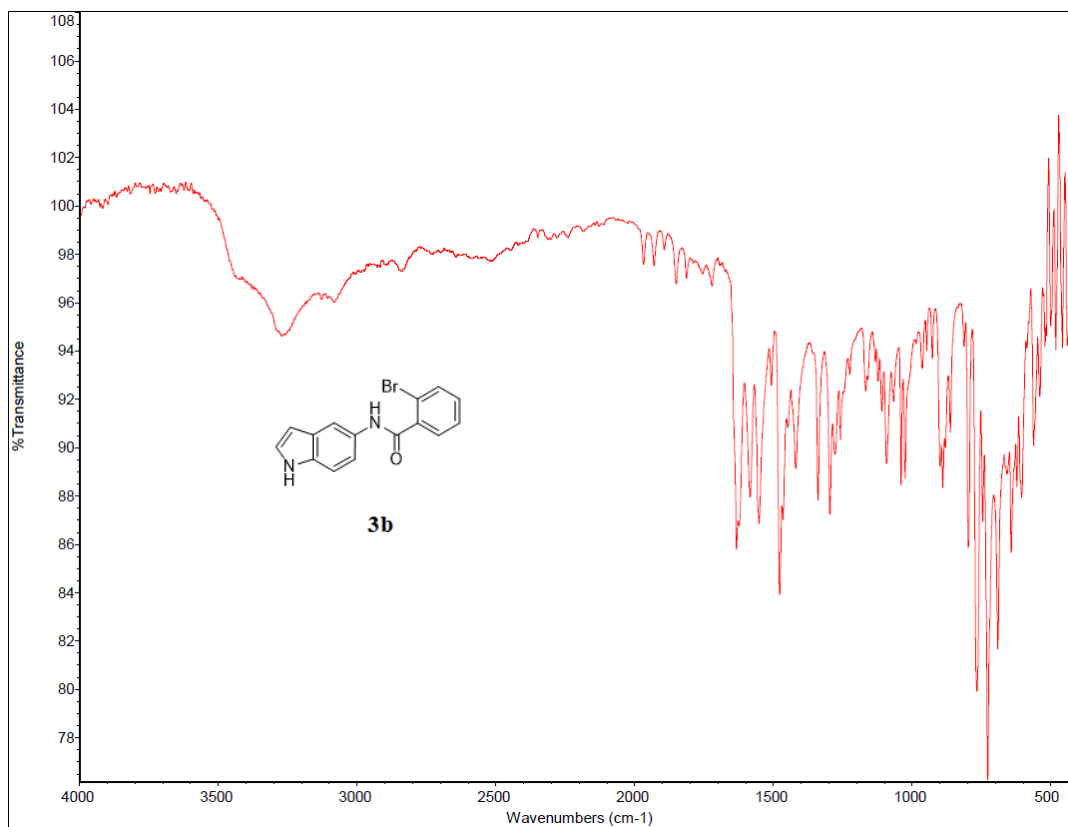

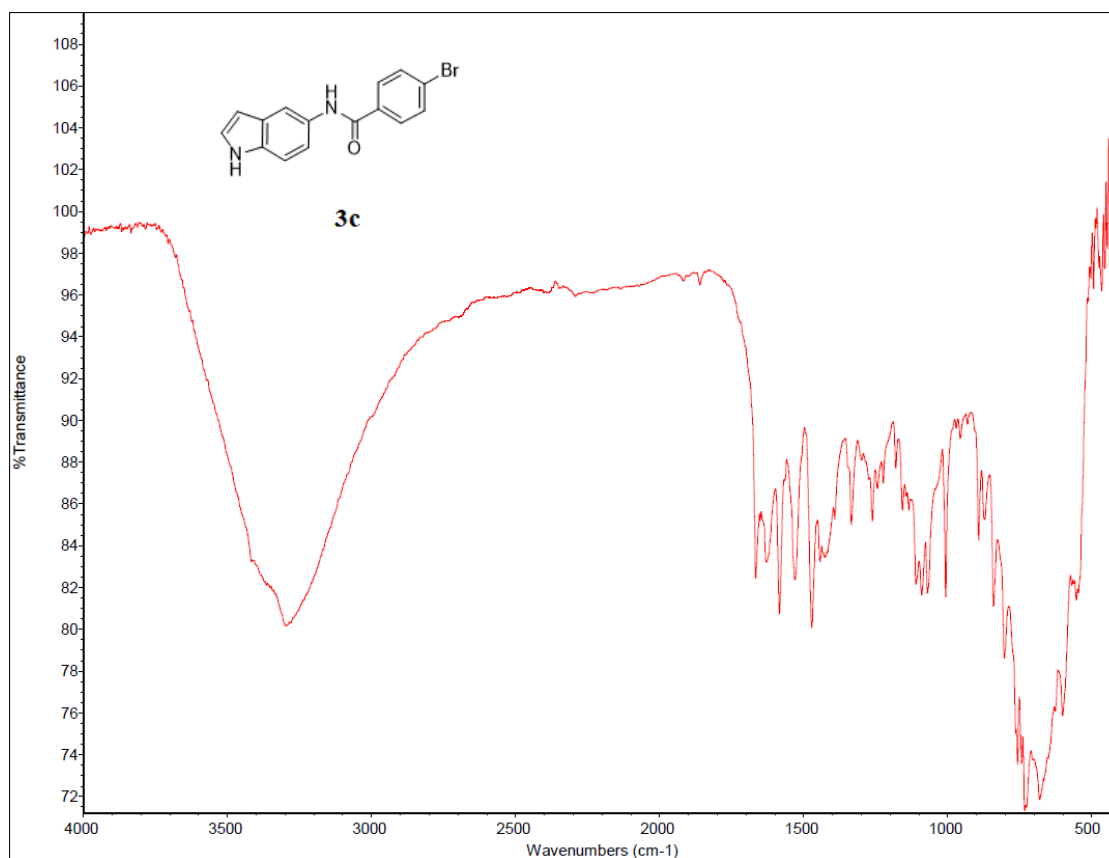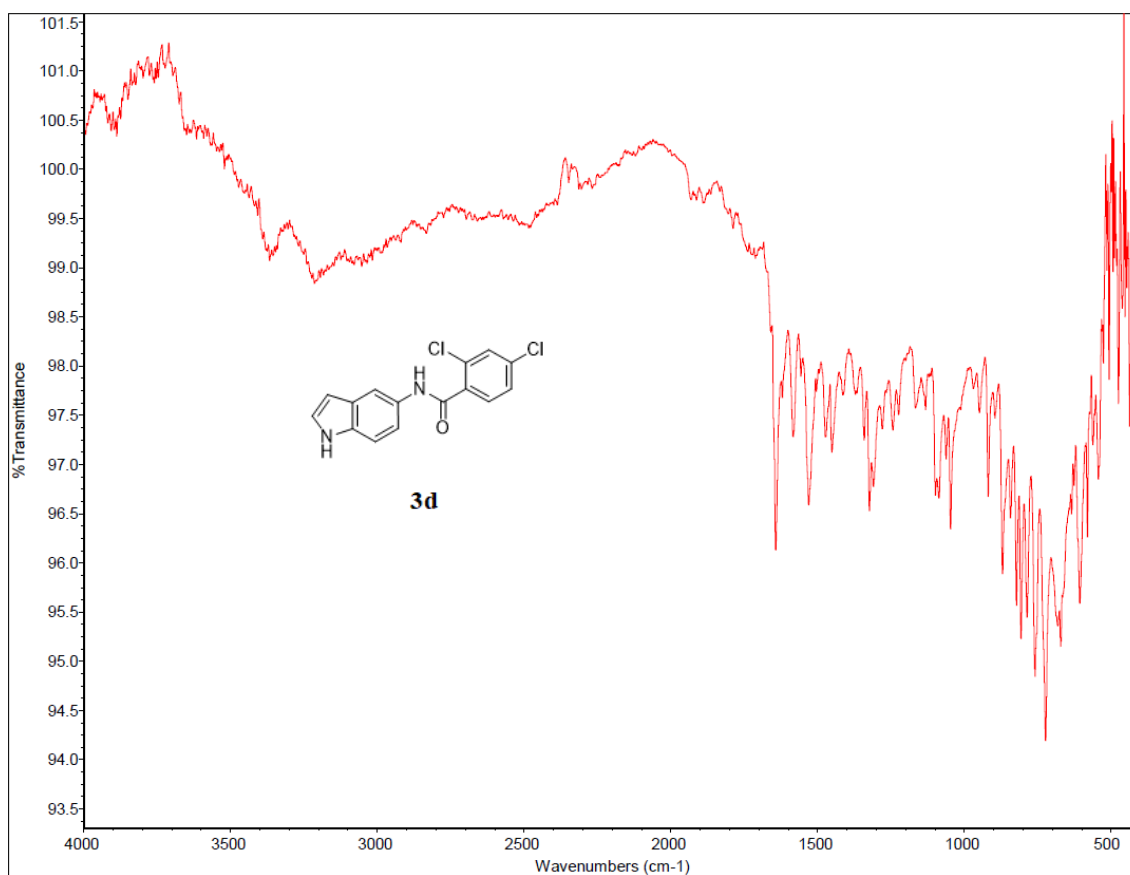

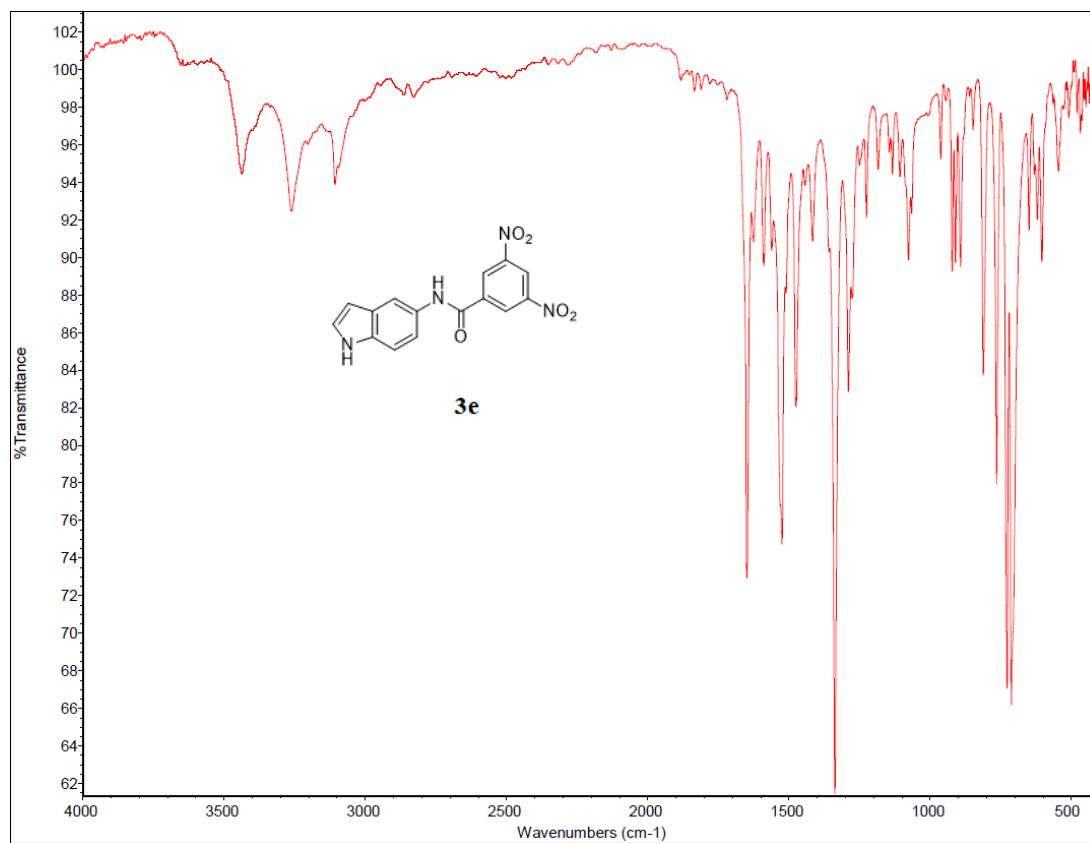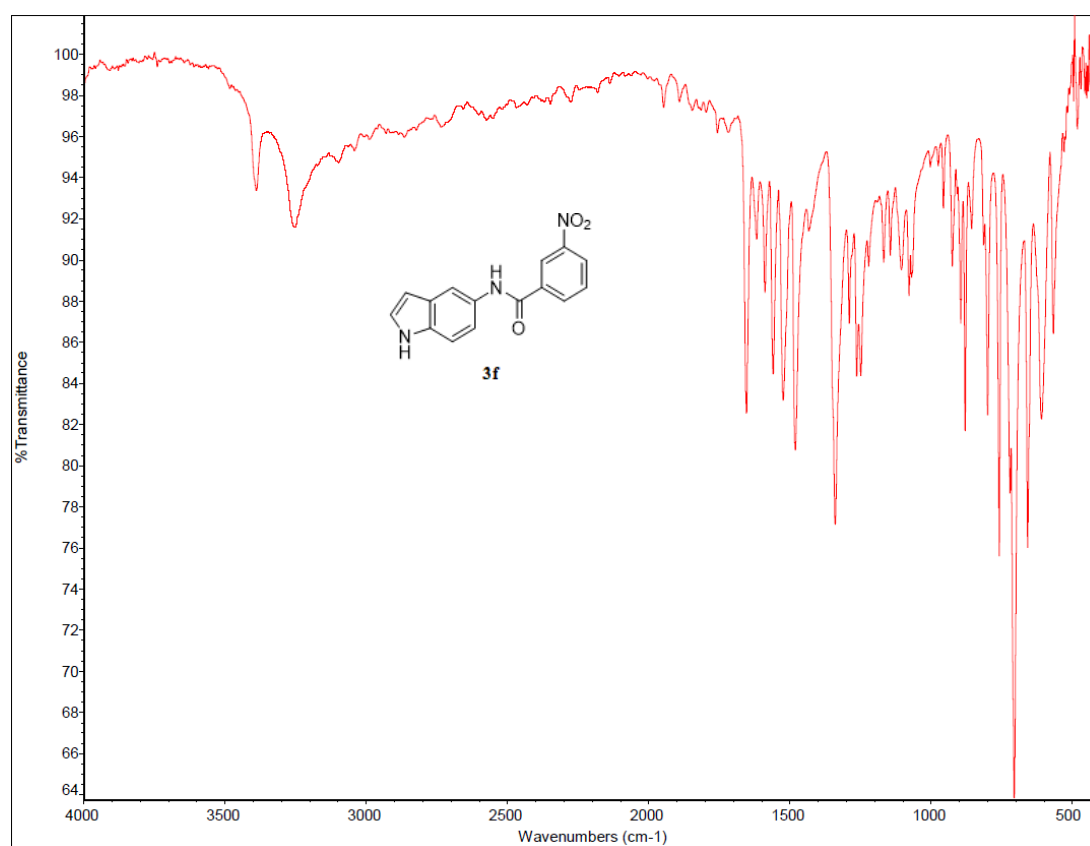

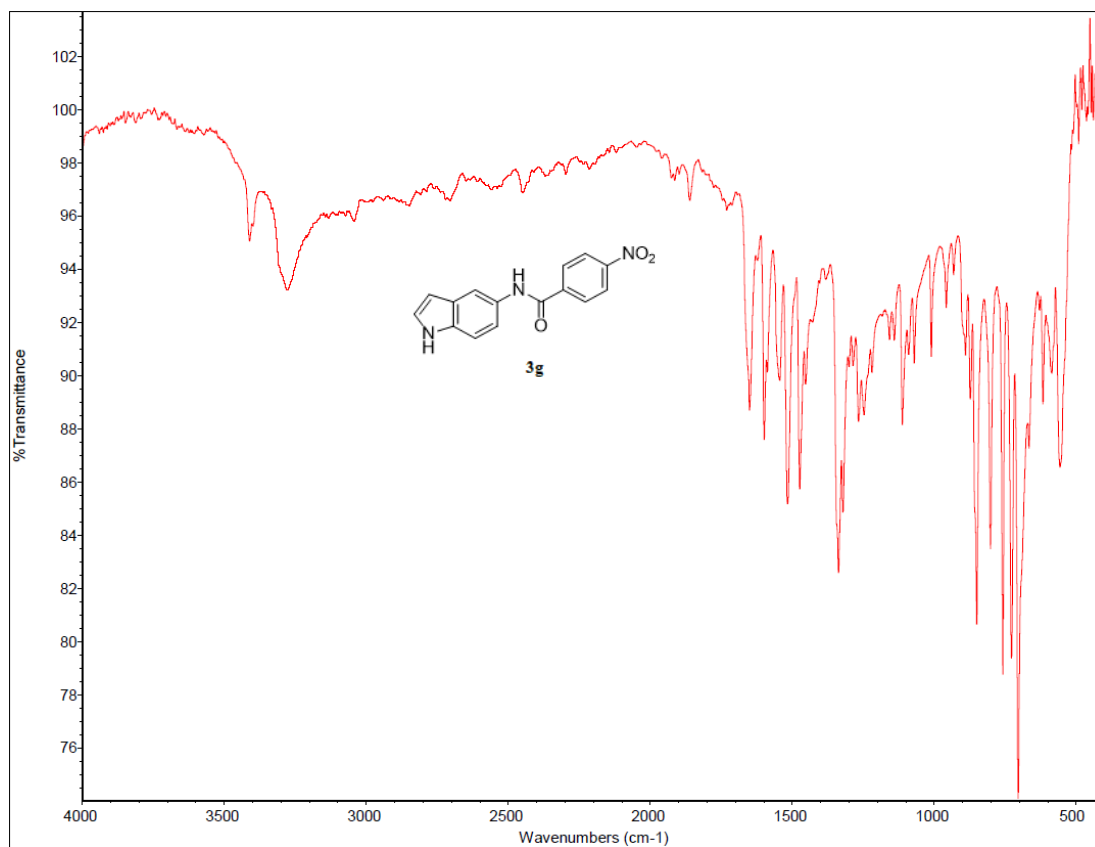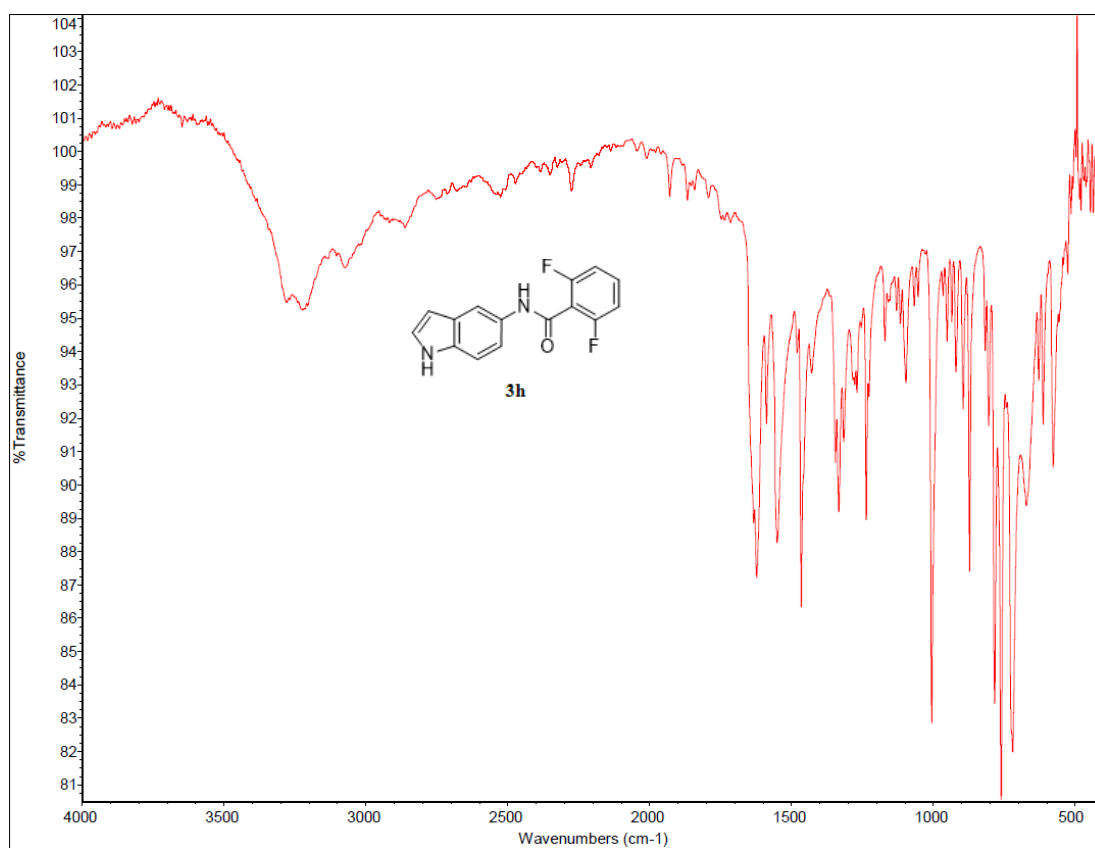

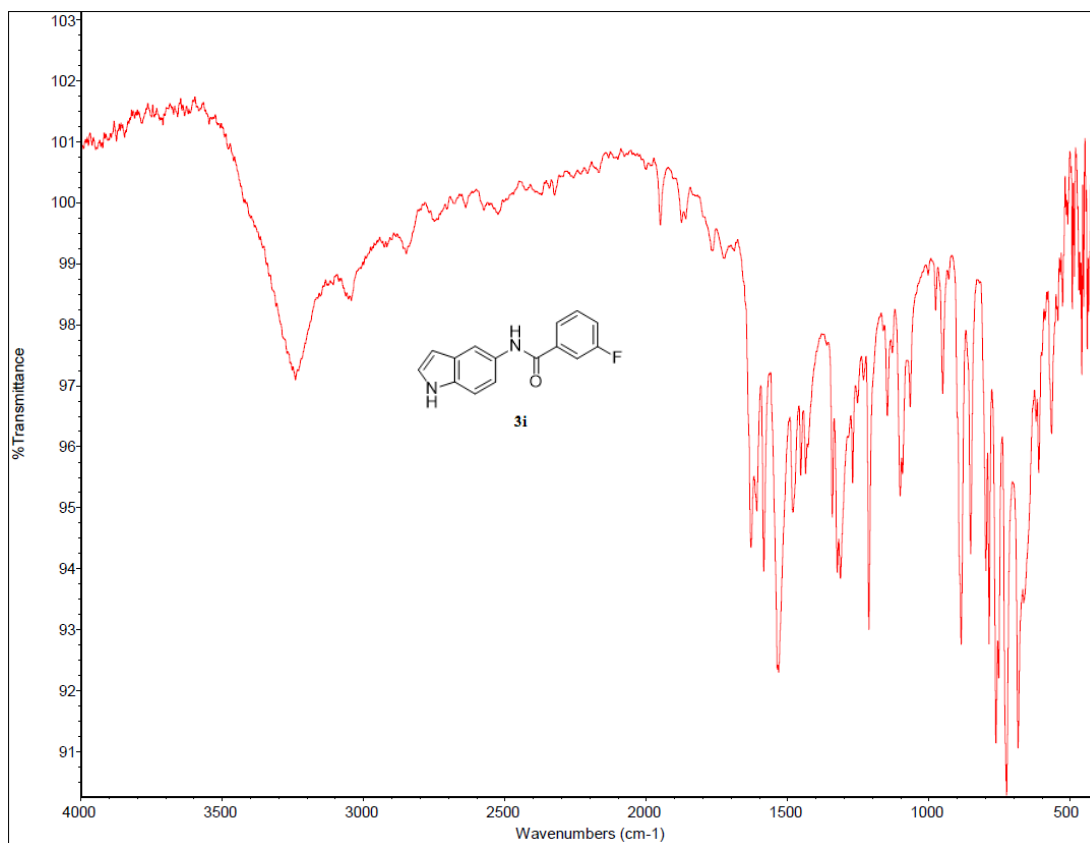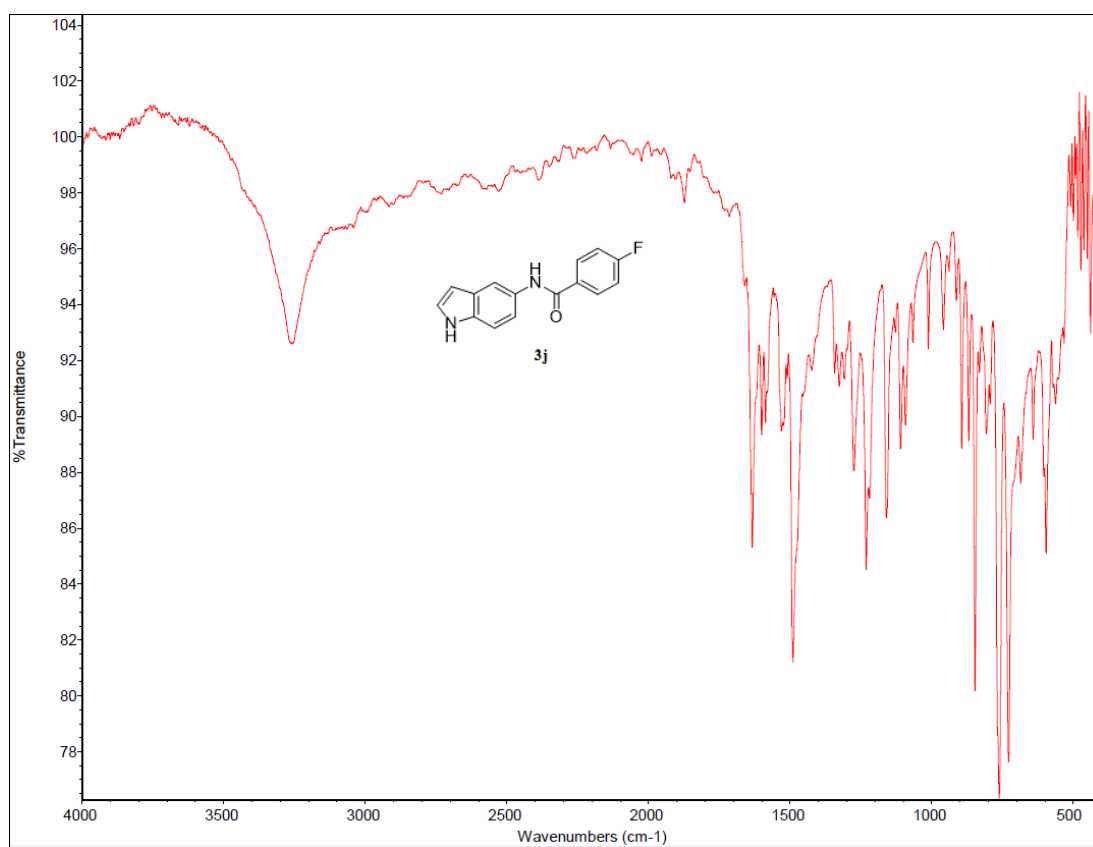

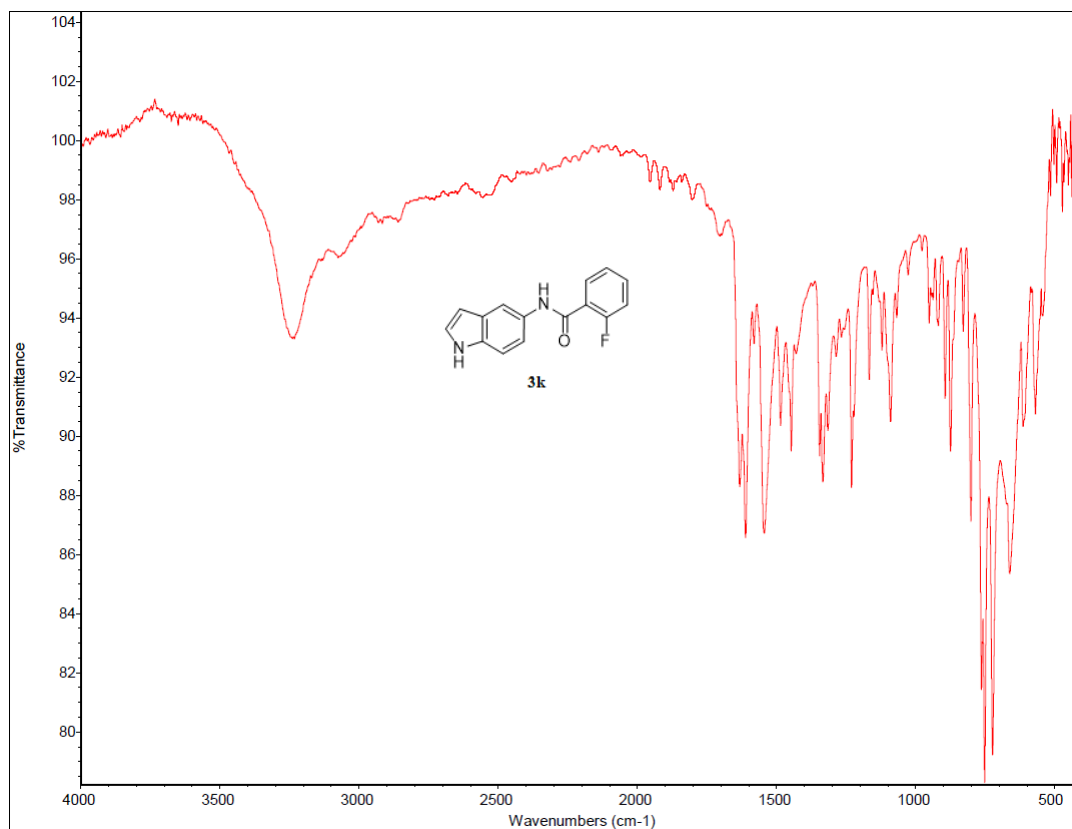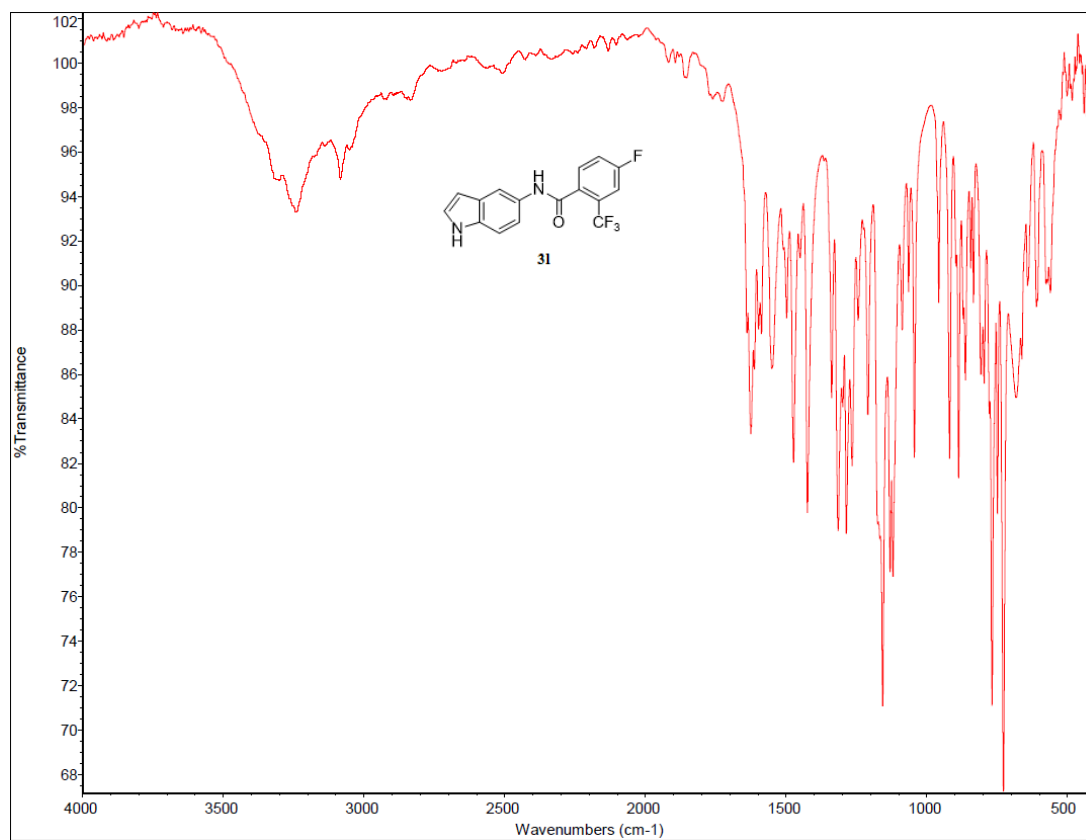



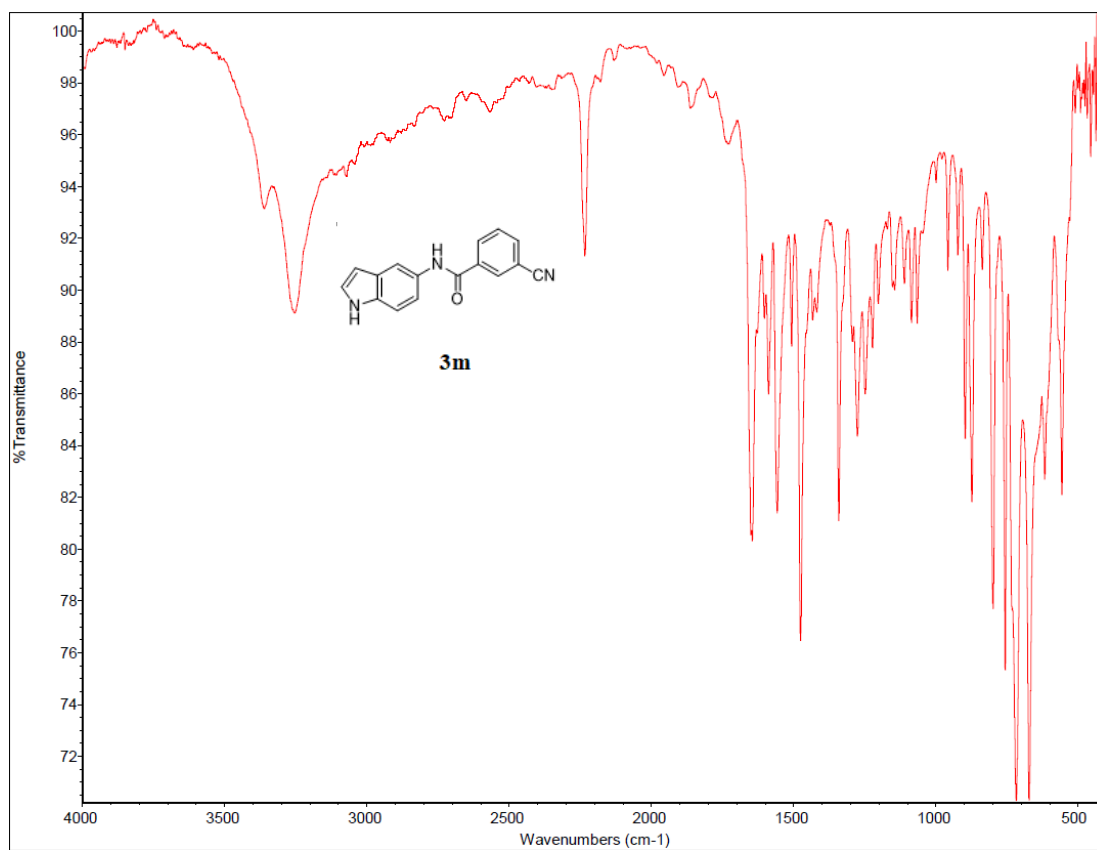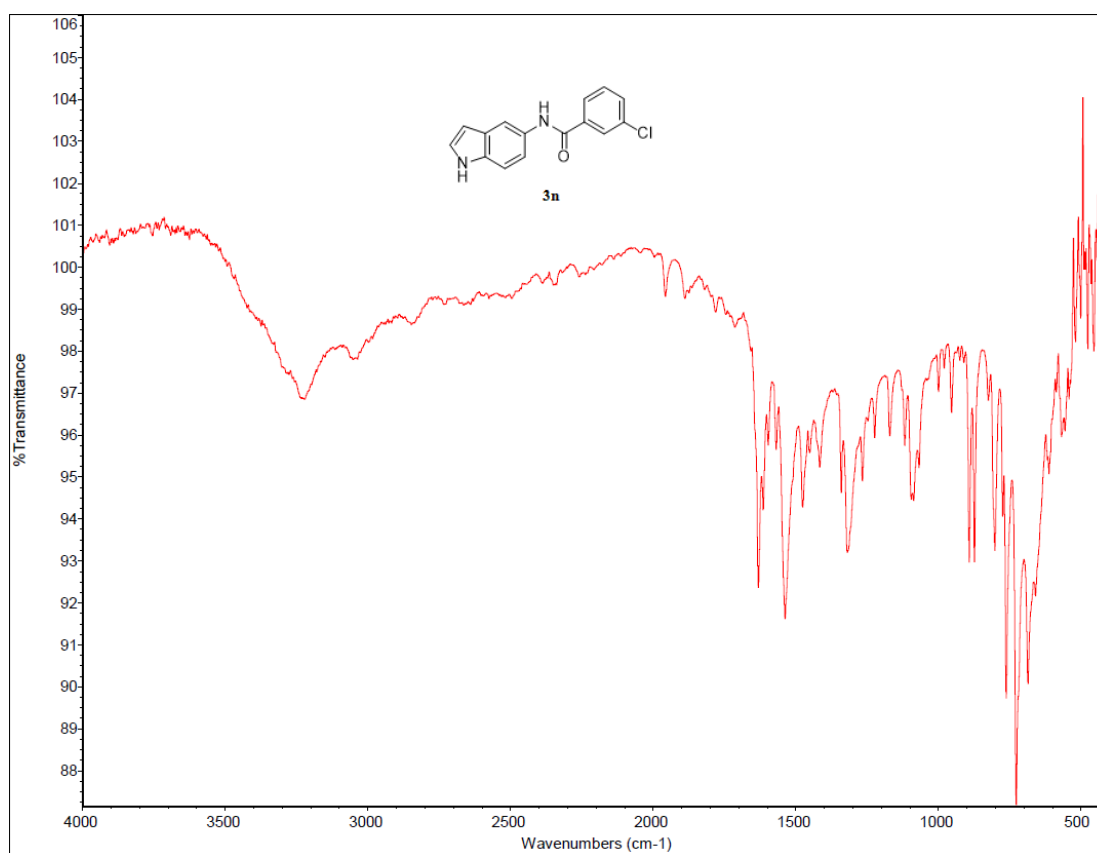

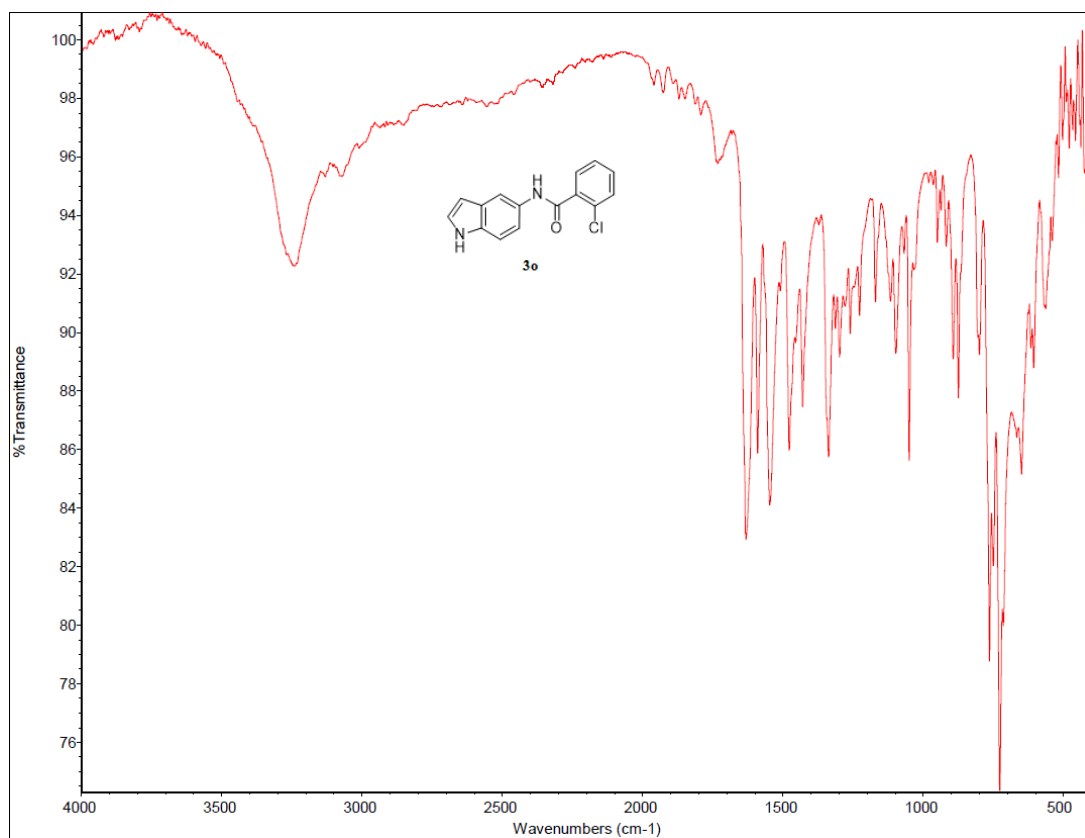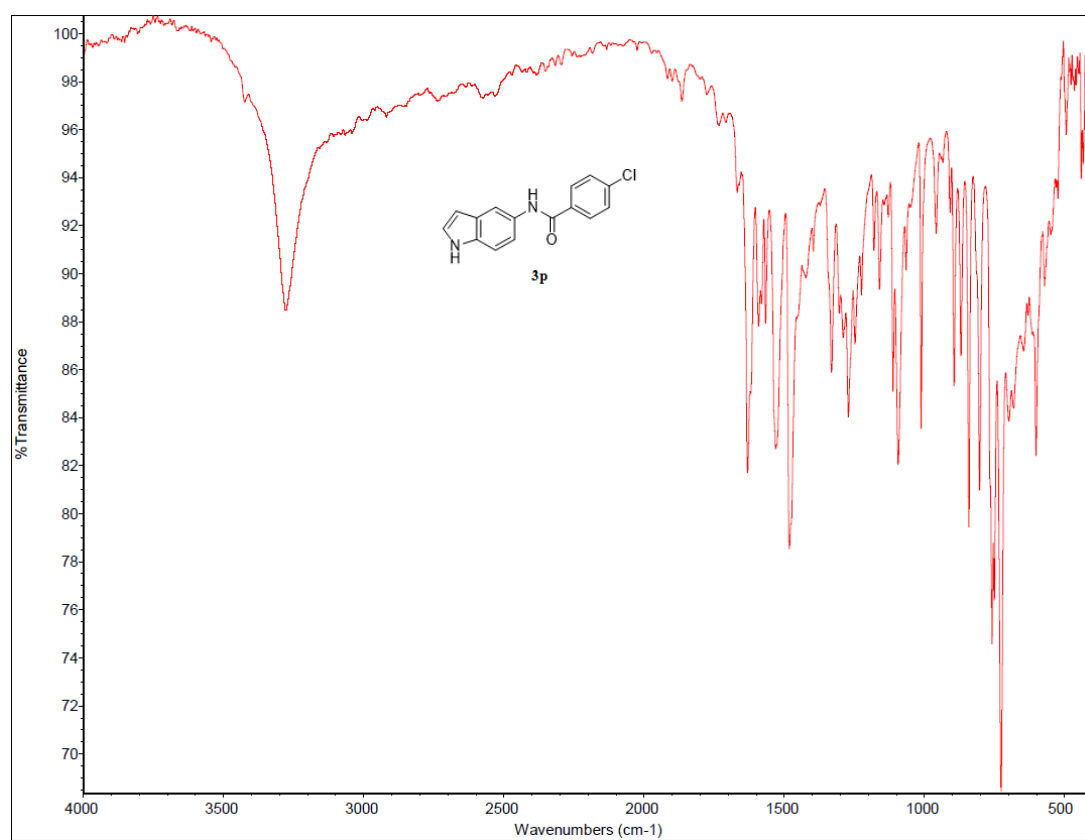

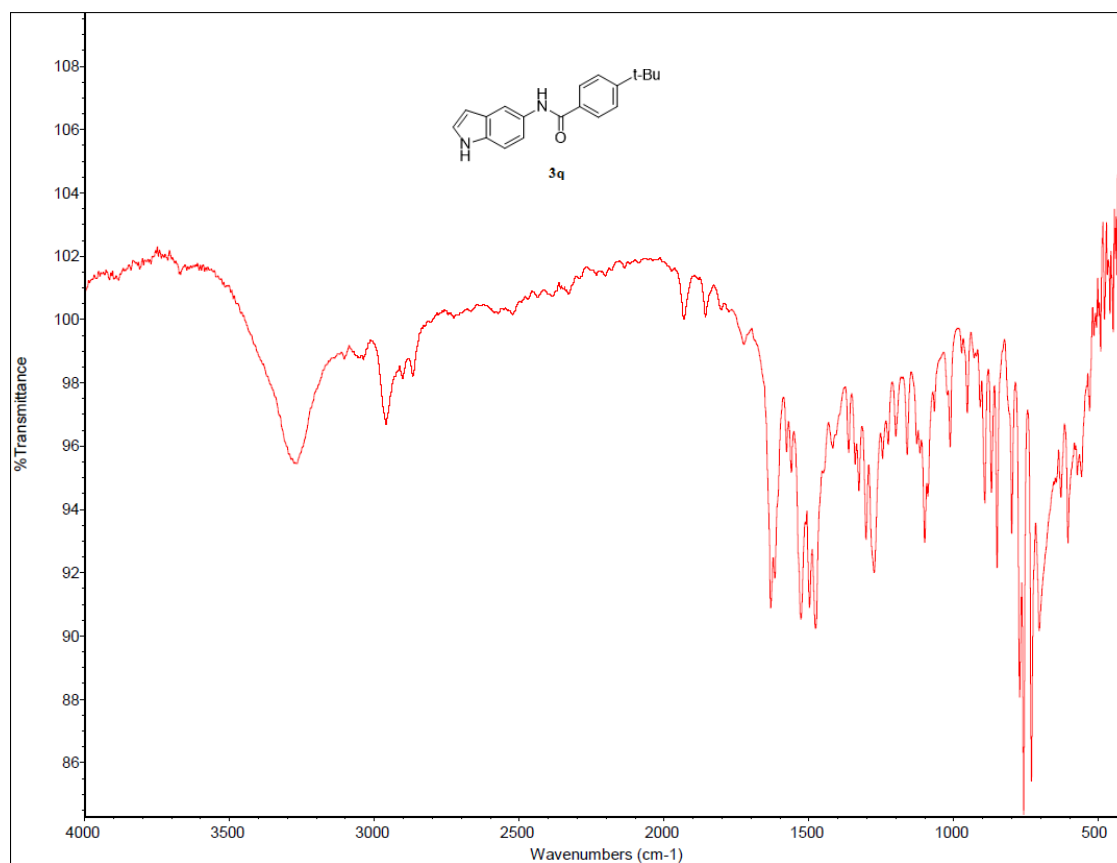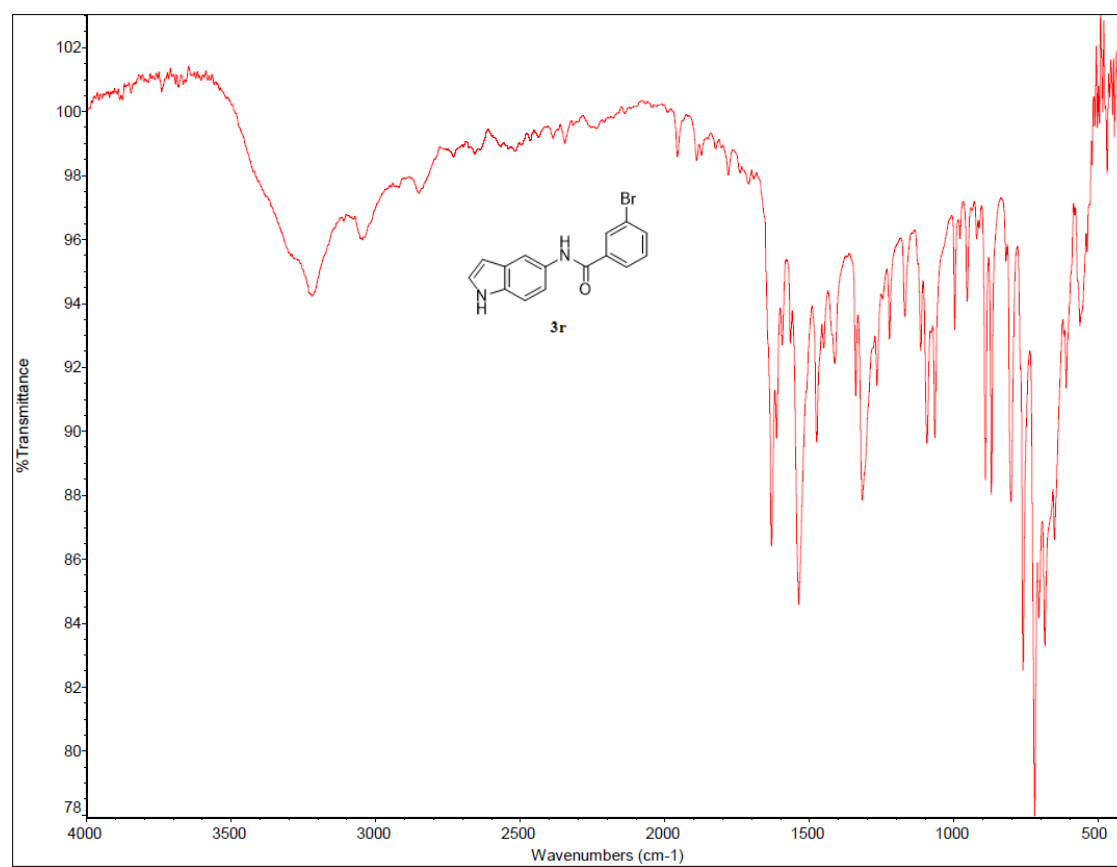

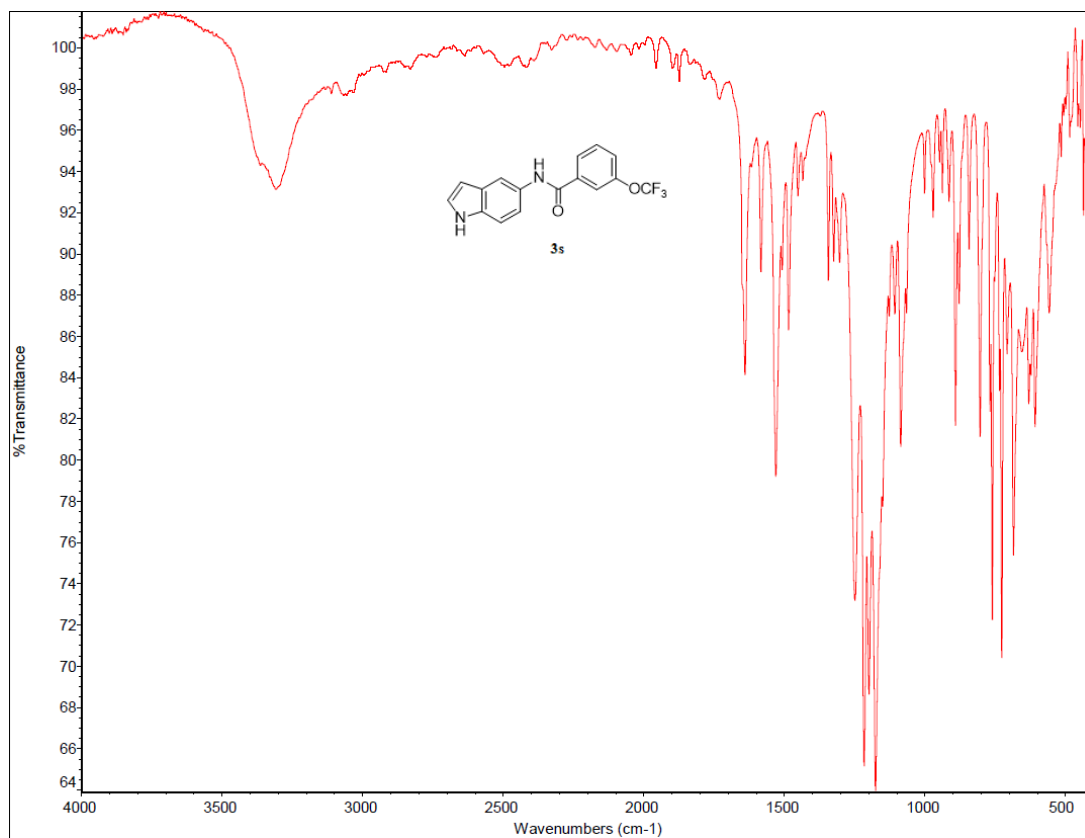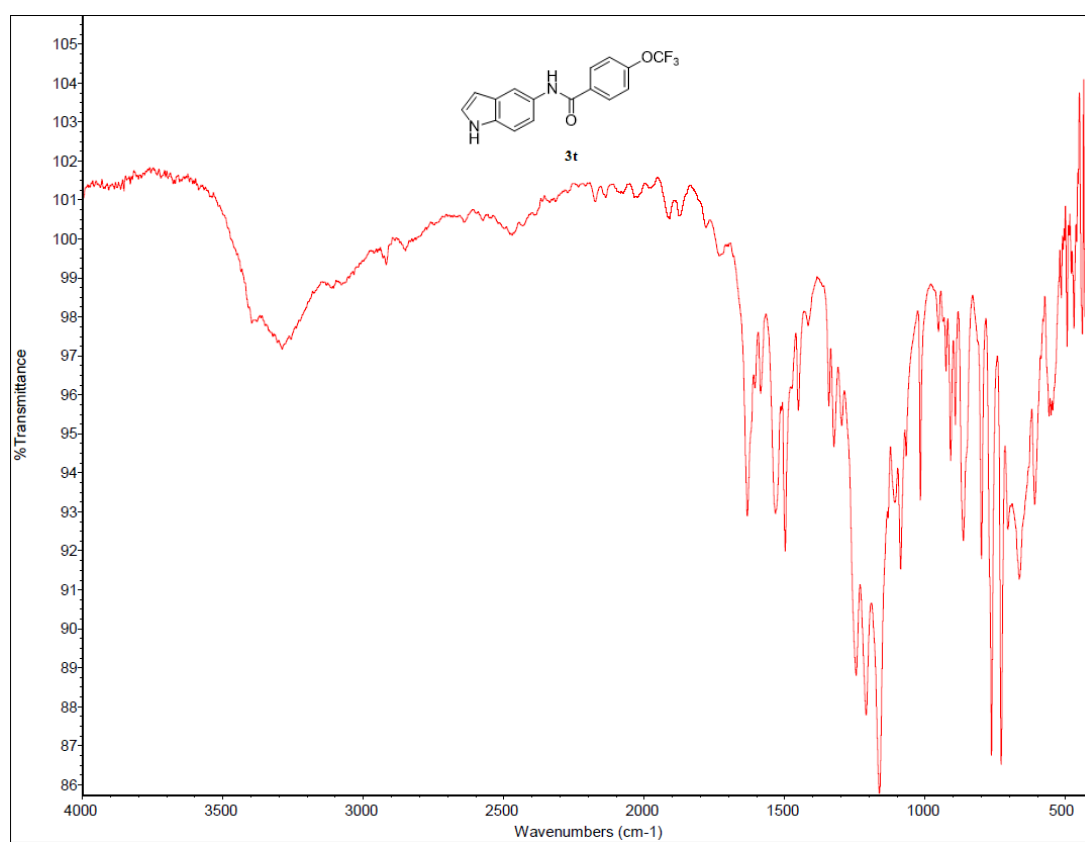

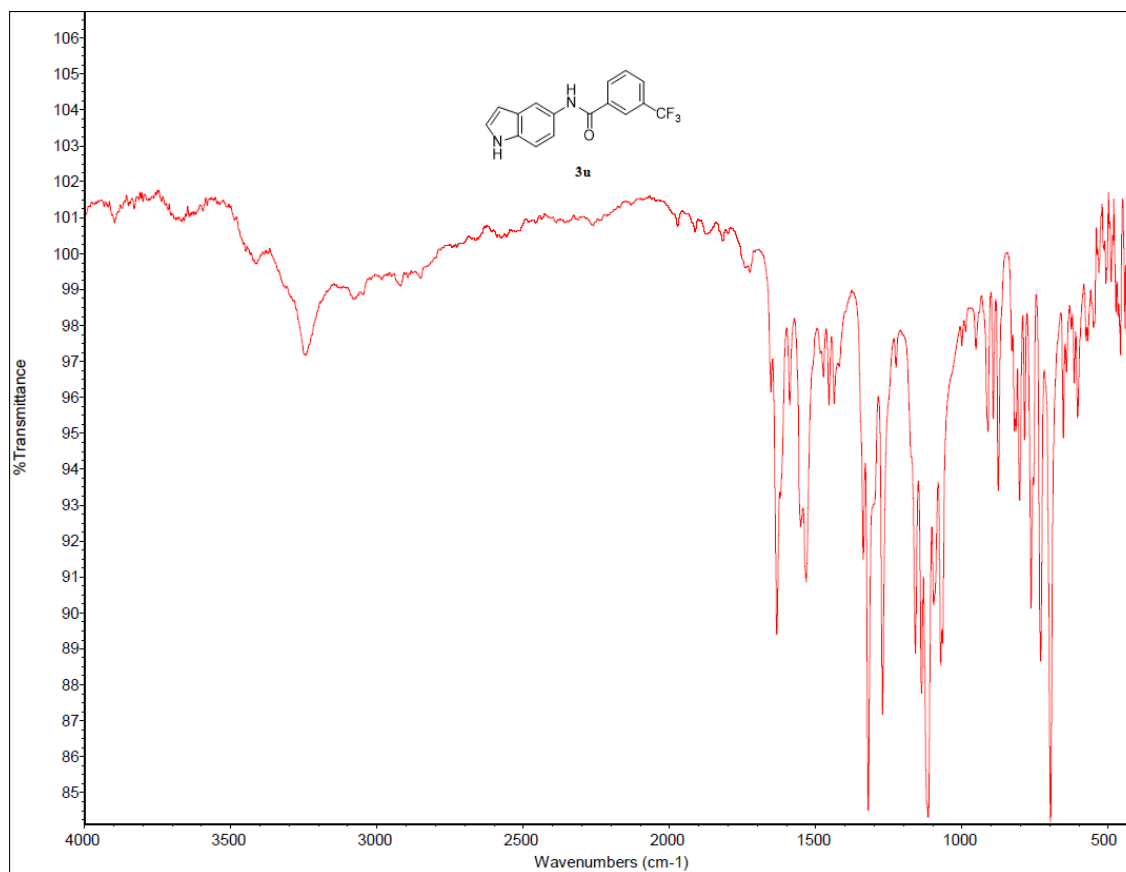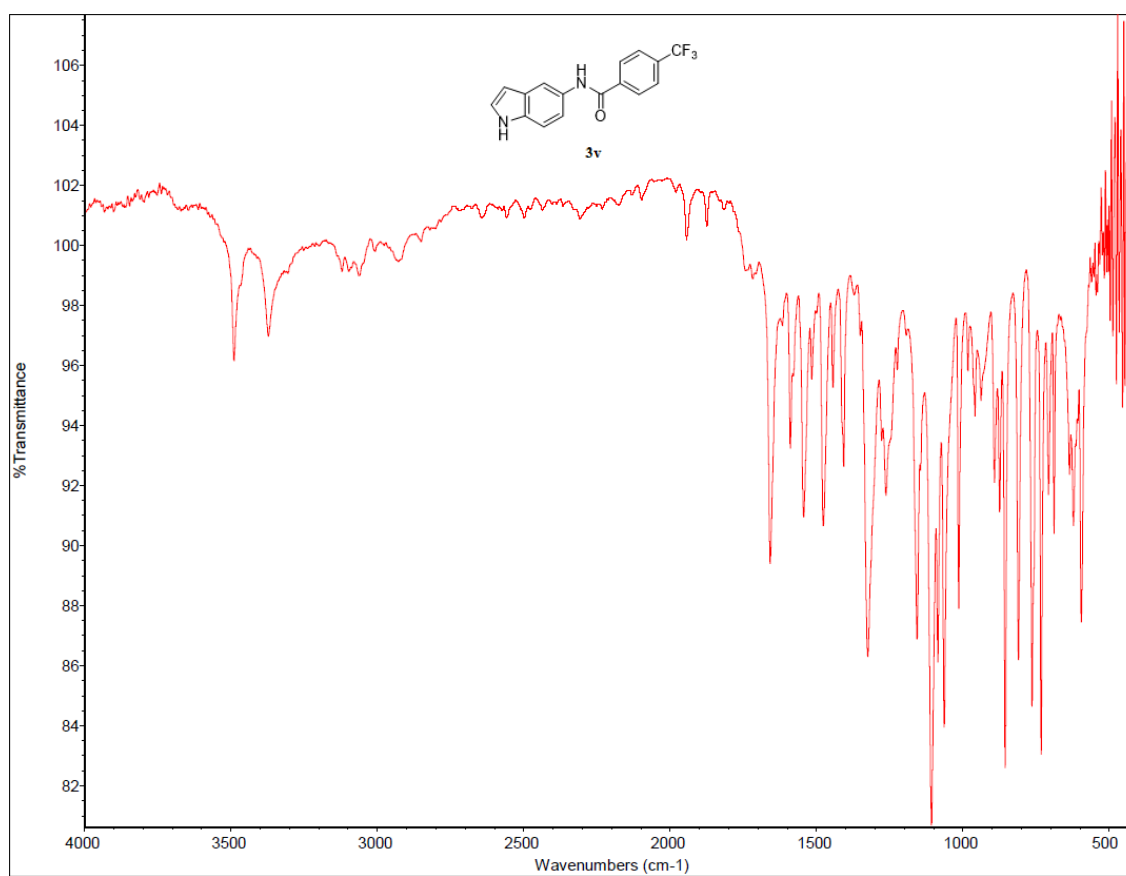

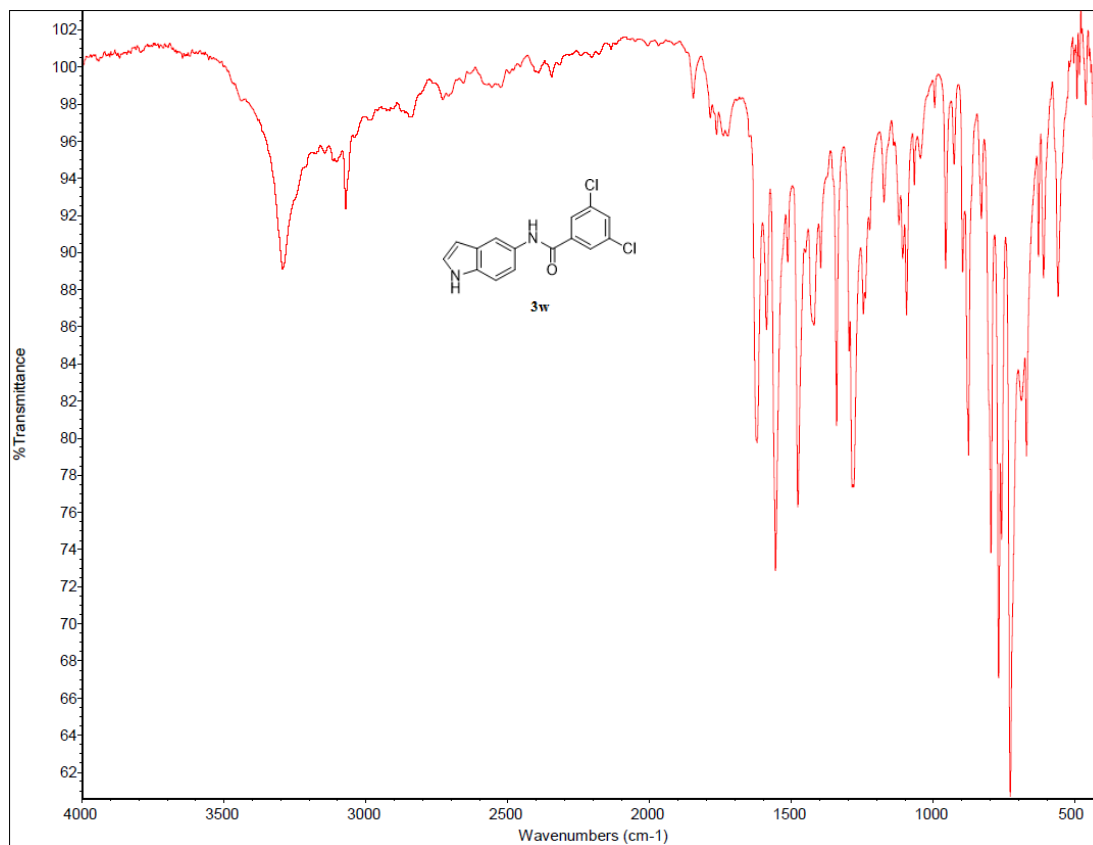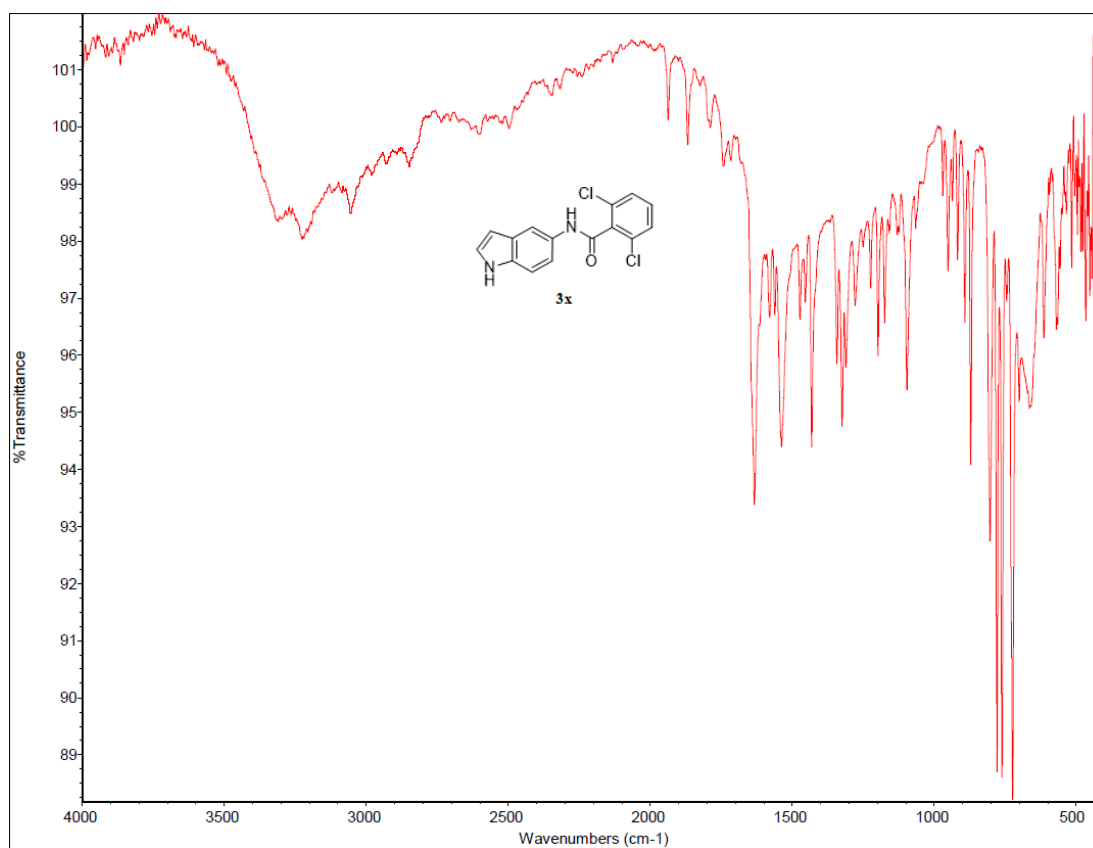

## 6. Materials and methods of monoamine oxidase (MAO) enzyme assay

The inhibitory activity of MAO-A, B enzyme of the compounds was evaluated based on previously described method [1]. The MAO activity was measured in relative fluorescence units (RFU) evoked by peroxidase-catalyzed oxidation of Amplex Red® to resorufin, in which H<sub>2</sub>O<sub>2</sub> generated by MAO reaction was used as the electron donor. Human recombinant MAO-A (*h*MAO-A) and MAO-B (*h*MAO-B) enzyme expressed in insect cells were obtained from Sigma Aldrich. The 2 µL of test compound in DMSO (final concentration: 1 nM – 10 µM) was treated with 98 µL of *h*MAO enzyme solution in 50 mM sodium phosphate buffer (pH 7.4, final protein amounts: ~1.25 µg protein/well for MAO-A and ~2.5 µg protein/well for MAO-B) on 96-well black plate and incubated for 15 min at 37 °C. Then 100 µL of reaction working solution which is mixed solution of 400 µM Amplex Red® (Cayman, final concentration: 200 µM), 2 U/mL horseradish peroxidase (Sigma-Aldrich, final concentration: 1 U/mL) and 2 mM substrate (*p*-tyramine for MAO-A, benzylamine for MAO-B, Sigma-Aldrich, final concentration: 1 mM) in 50 mM sodium phosphate buffer (pH 7.4) were added and incubated for 20 min at 37 °C in the dark. The fluorescent intensity was quantified using a microplate reader (SpectraMax®i3, Molecular Device) with an excitation at 545 nm and an emission at 590 nm. The 50% inhibitory concentrations (IC<sub>50</sub>) of compounds were determined as the mean ± S.E.M. in triplicate from the dose-response inhibition curves using SigmaPlot® 13.0.

## References

1. Choi, J.W.; Jang, B.K.; Cho, N.C.; Park, J.H.; Yeon, S.K.; Ju, E.J.; Lee, Y.S.; Han, G.; Pae, A.N.; Kim, D.J., et al. Synthesis of a series of unsaturated ketone derivatives as selective and reversible monoamine oxidase inhibitors. *Bioorganic & medicinal chemistry* **2015**, *23*, 6486-6496, doi:10.1016/j.bmc.2015.08.012.
